# Supplementary material for: Hexokinase 2 confers radio-resistance in hepatocellular carcinoma by promoting autophagy-dependent degradation of AIMP2
Source: PubMed Central journal article supplement (PMC10390495; doi:10.1038/s41419-023-06009-2), 2023-08-01

**A**

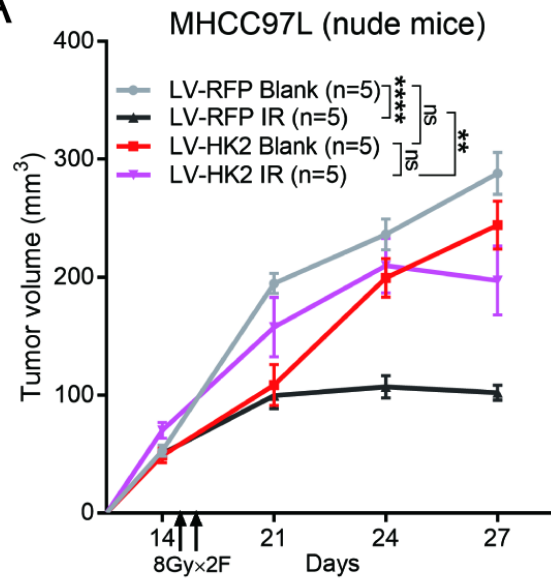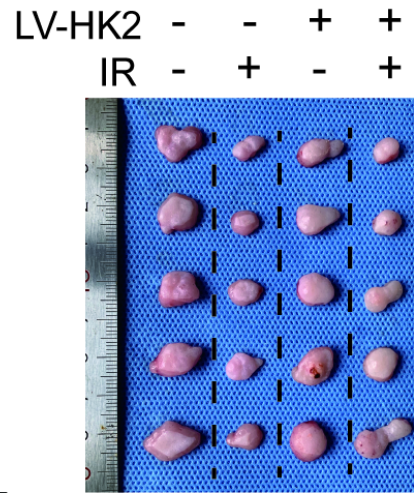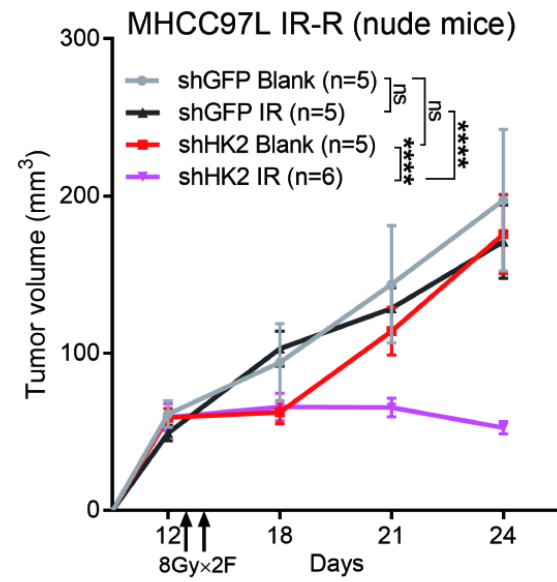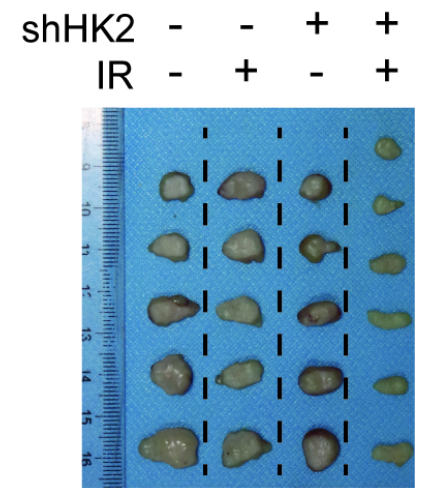

B

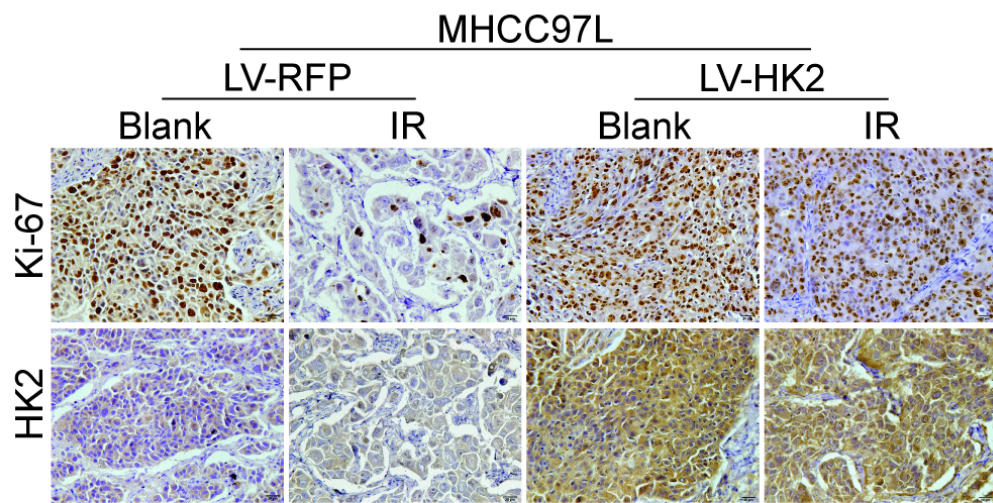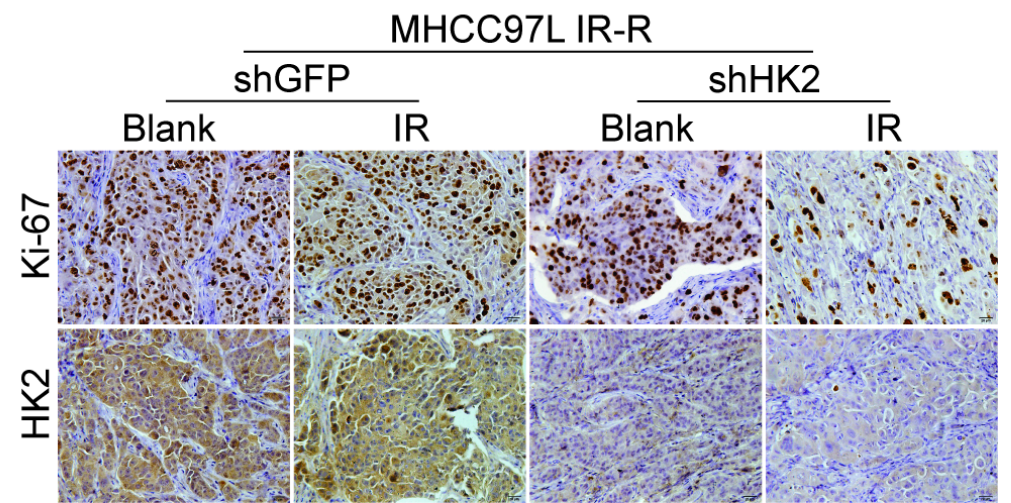

C

H22 (Nude mice)

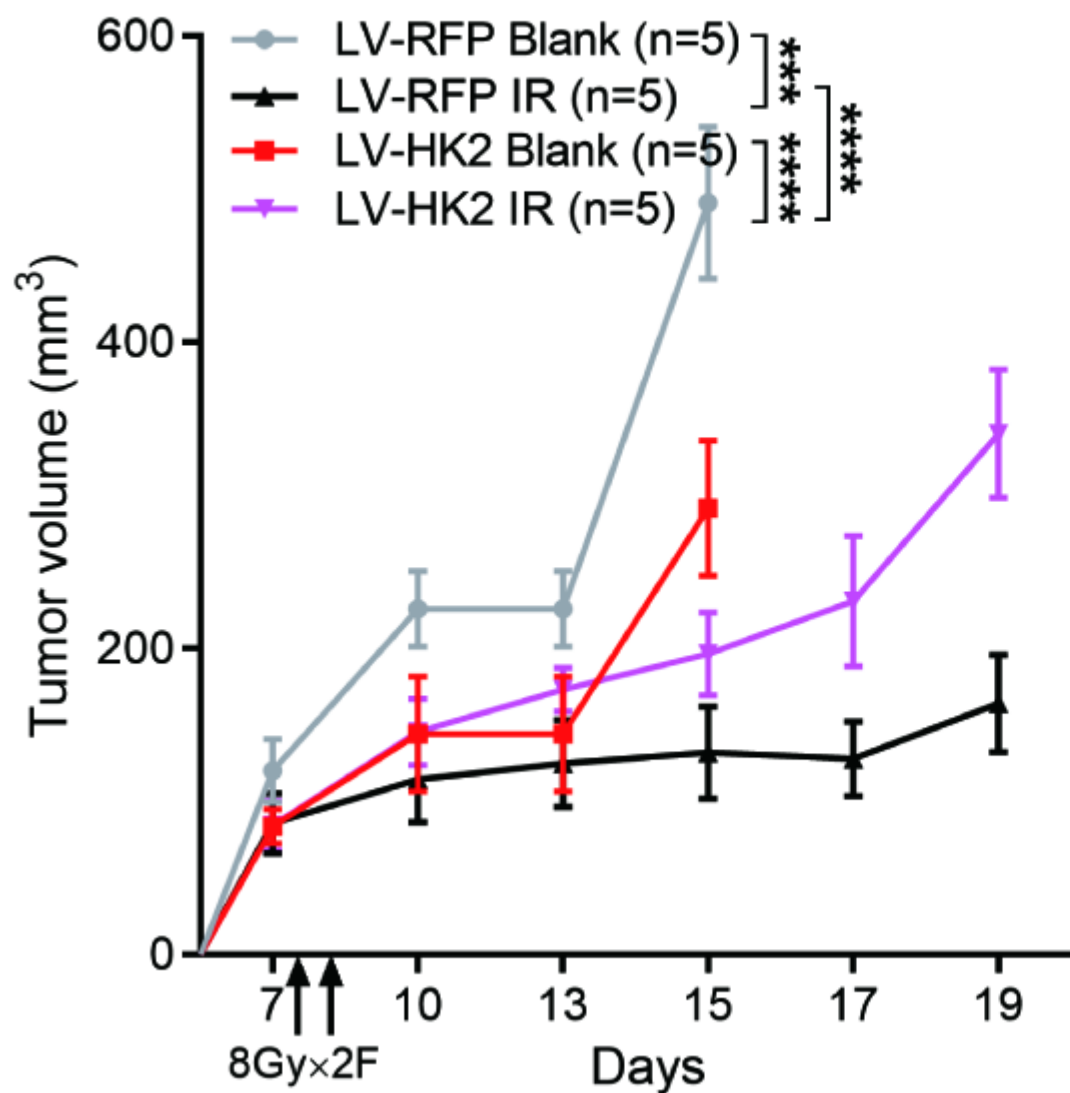

|        |   |   |   |   |
|--------|---|---|---|---|
| LV-HK2 | - | + | - | + |
| IR     | - | - | + | + |

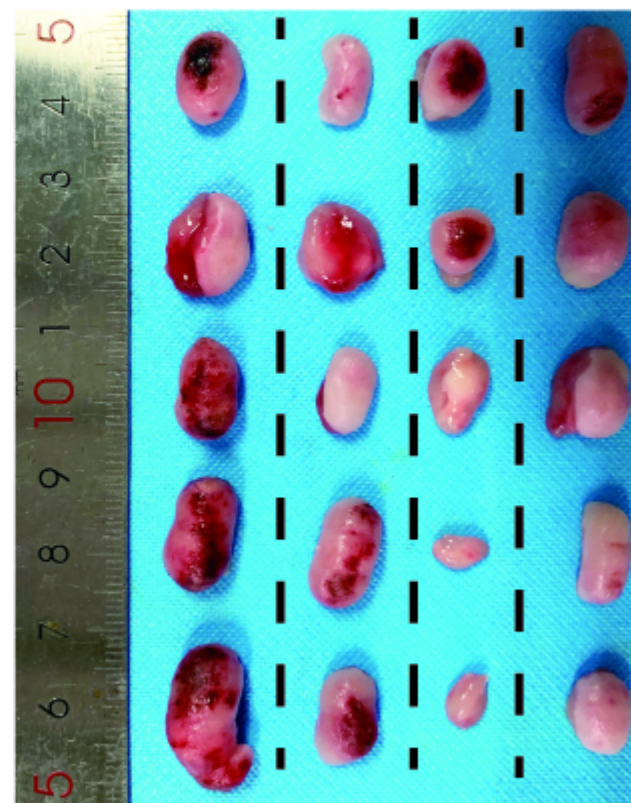

D

H22 cells (nude mice)

LV-RFP

LV-HK2

Blank

IR

Blank

IR

PCNA

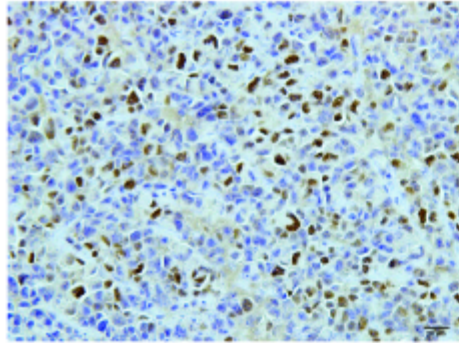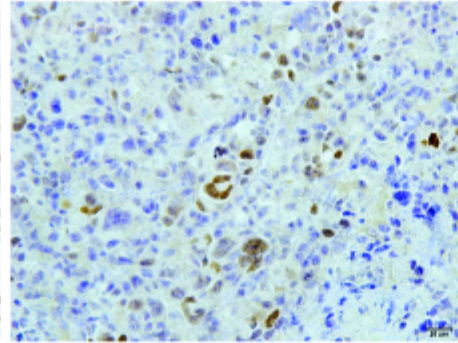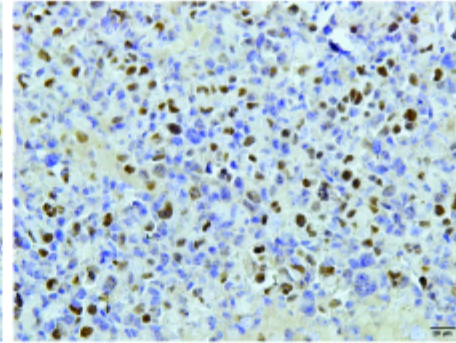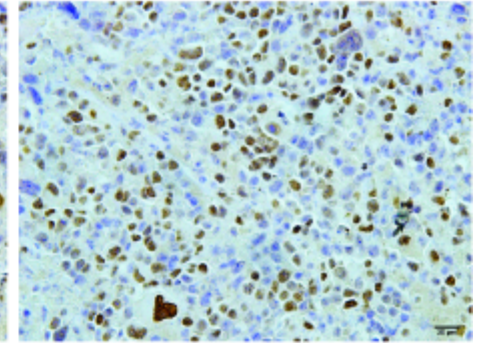

HK2

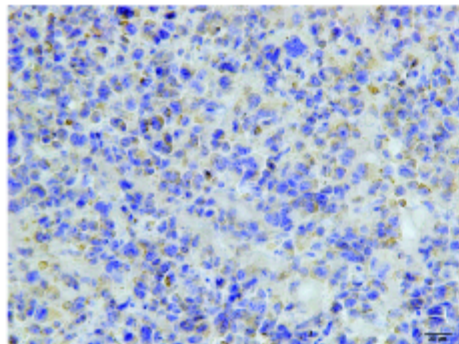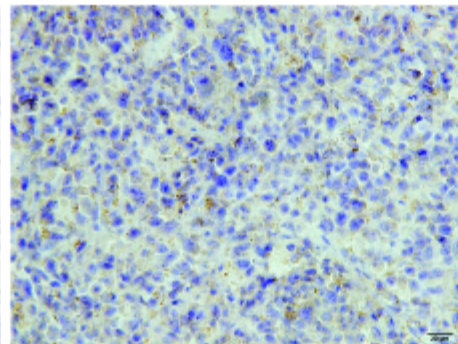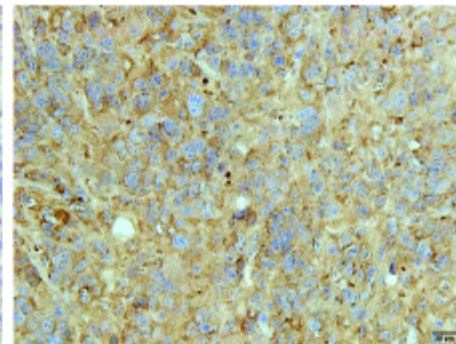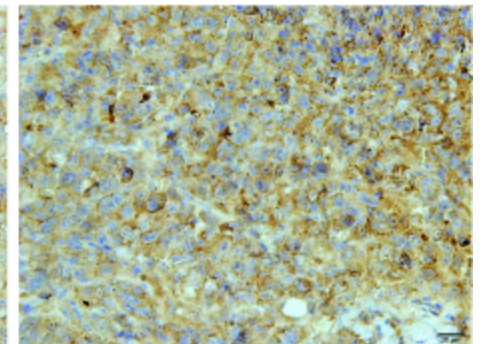

# E

## H22 (C57BL/6 mice)

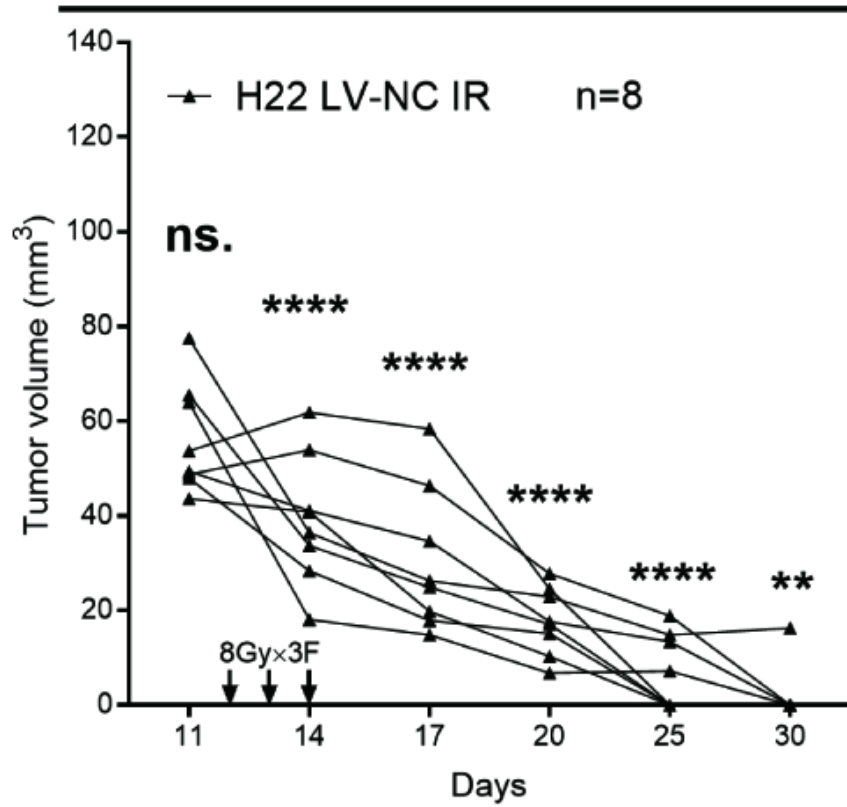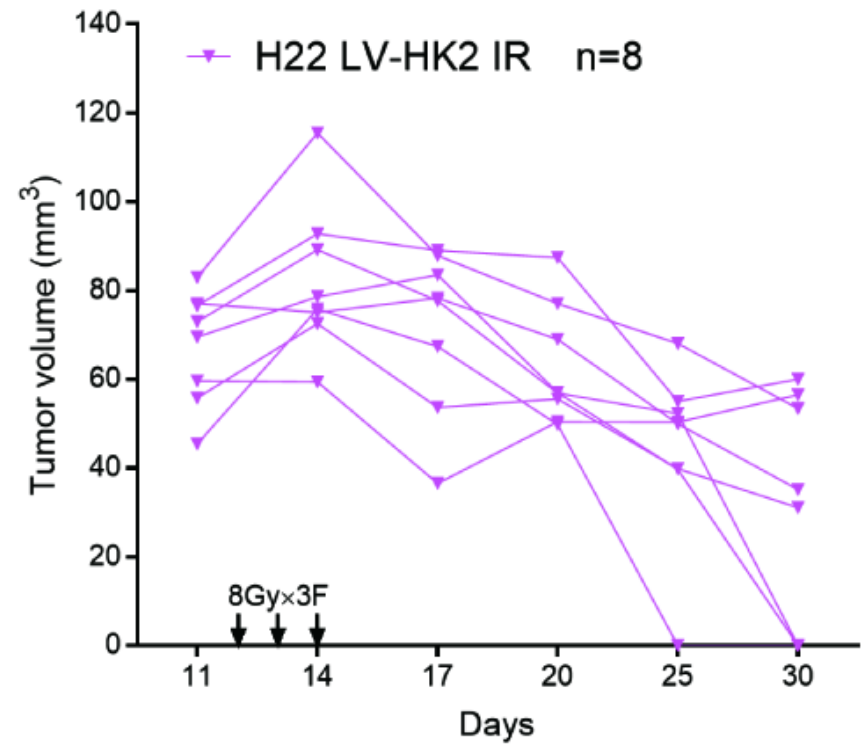

F

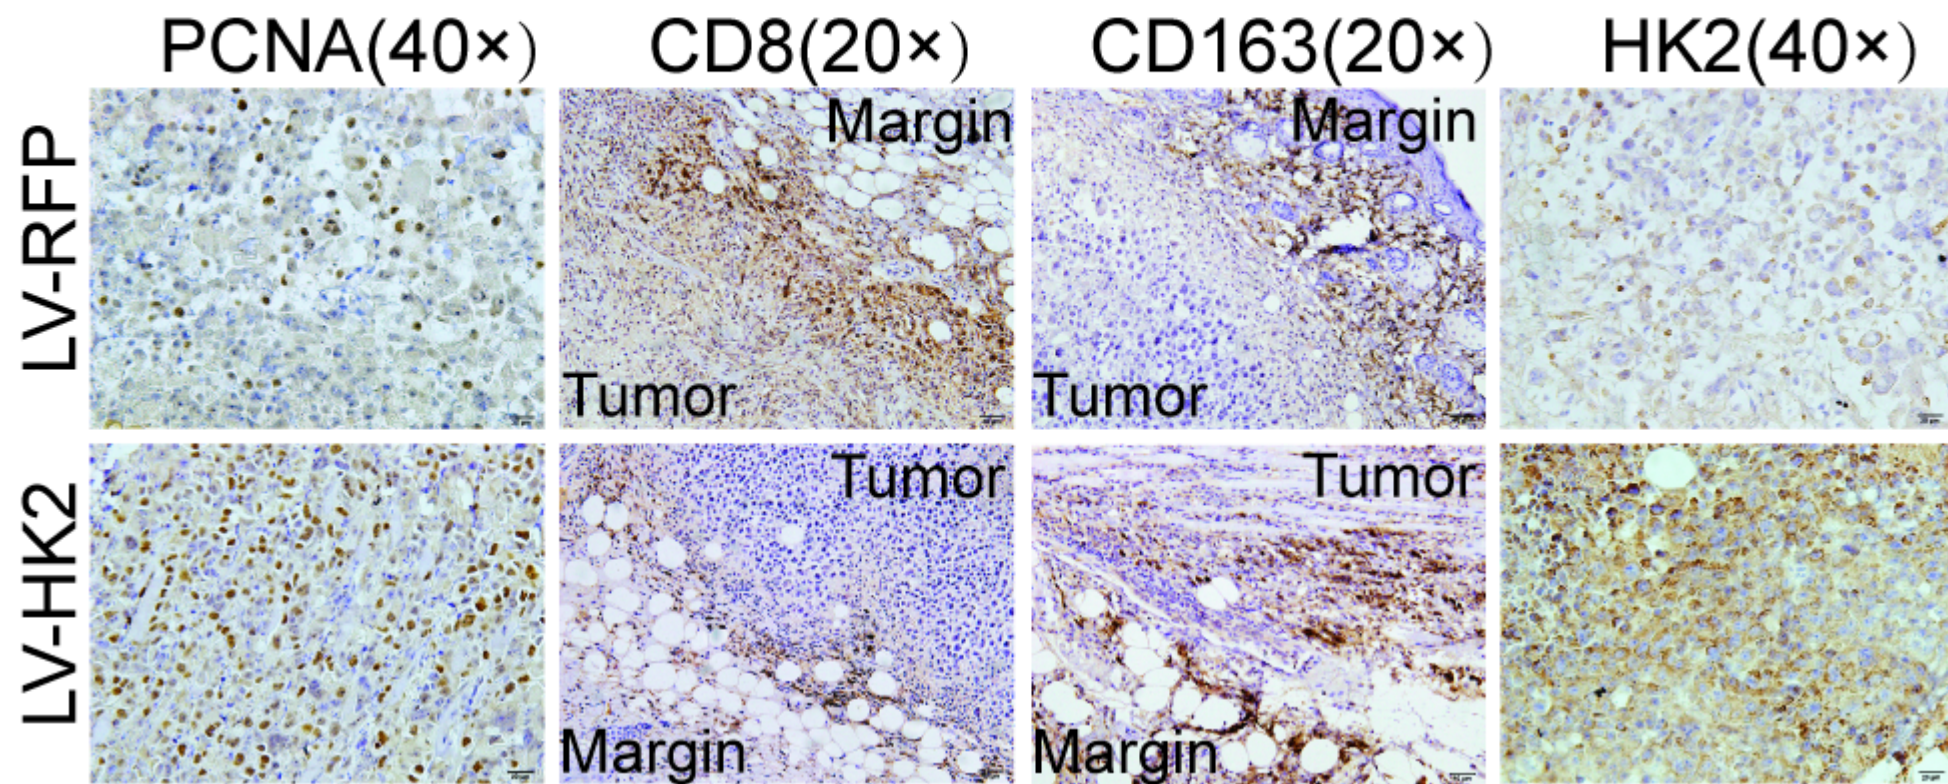

Supplement: 41419_2023_6009_MOESM3_ESM.pdf [file 41419_2023_6009_MOESM3_ESM.pdf]
