# Supplementary material for: Hexokinase 2 confers radio-resistance in hepatocellular carcinoma by promoting autophagy-dependent degradation of AIMP2
Source: PubMed Central journal article supplement (PMC10390495; doi:10.1038/s41419-023-06009-2), 2023-08-01

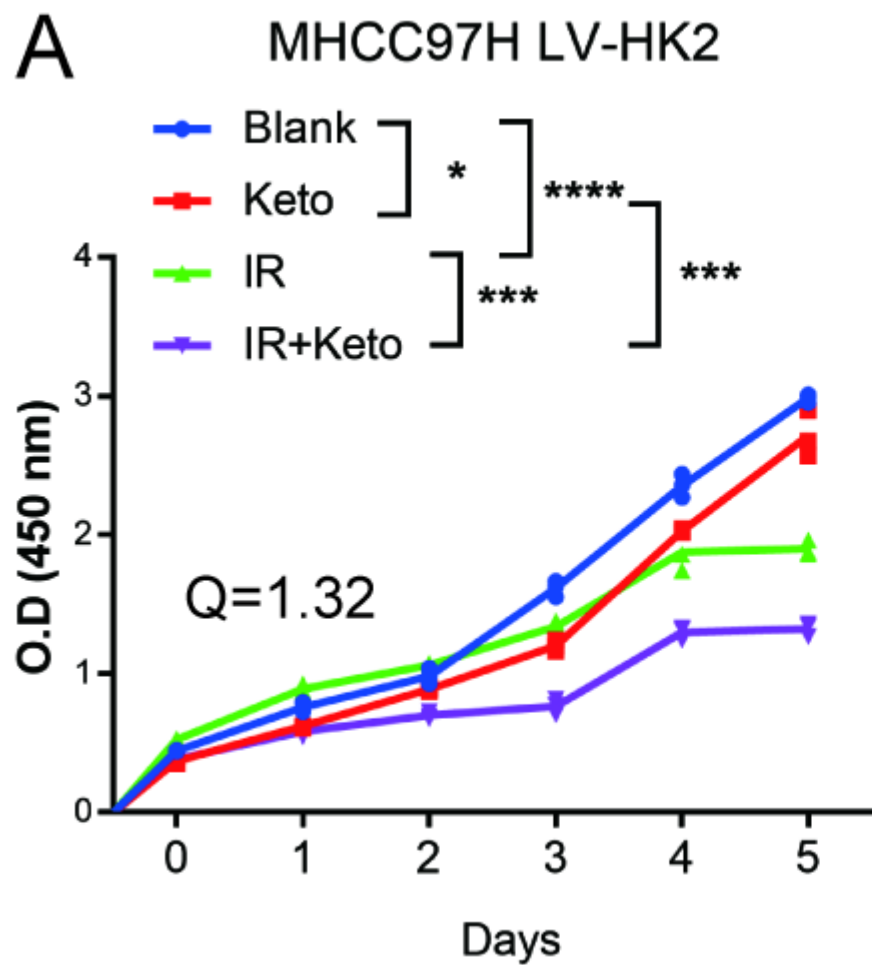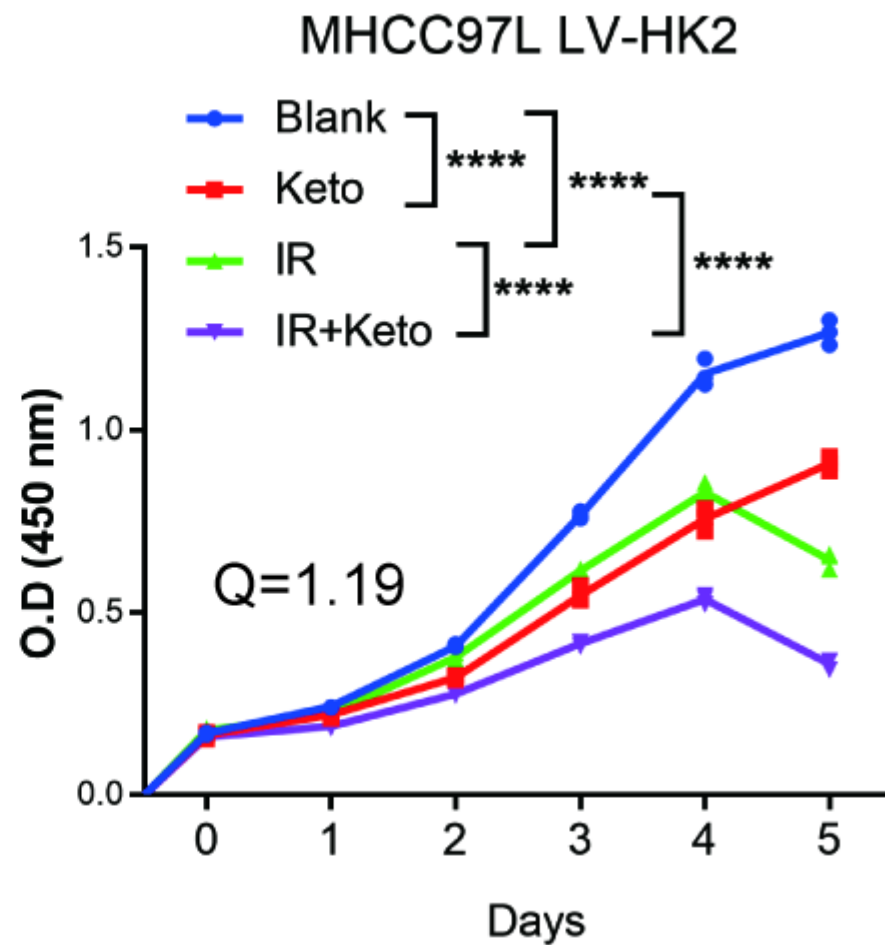

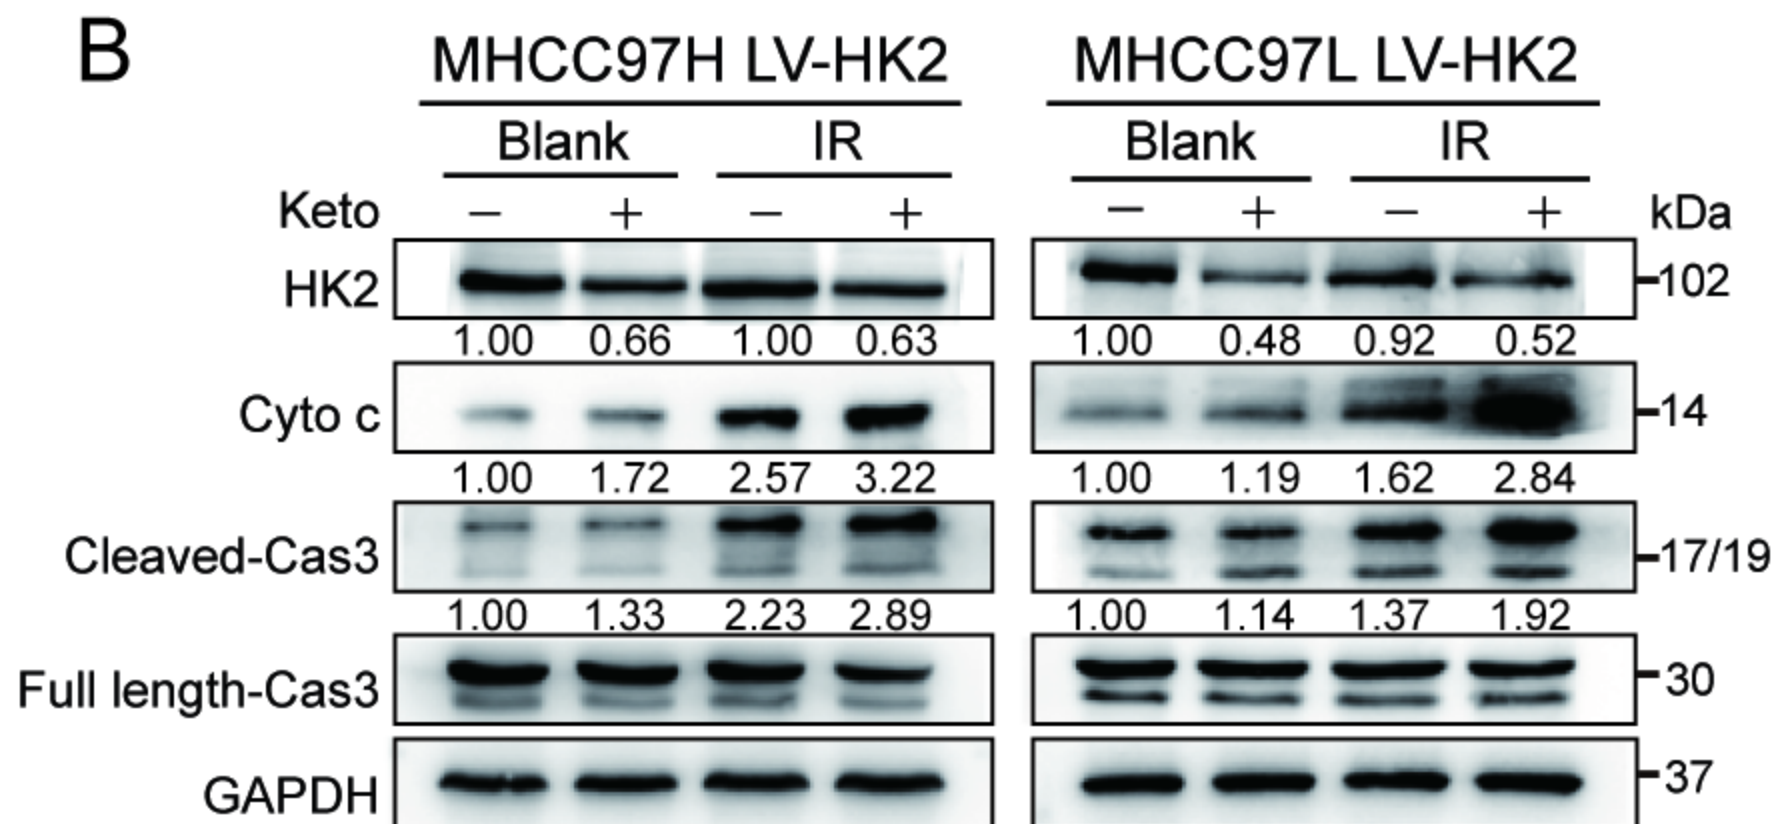

C

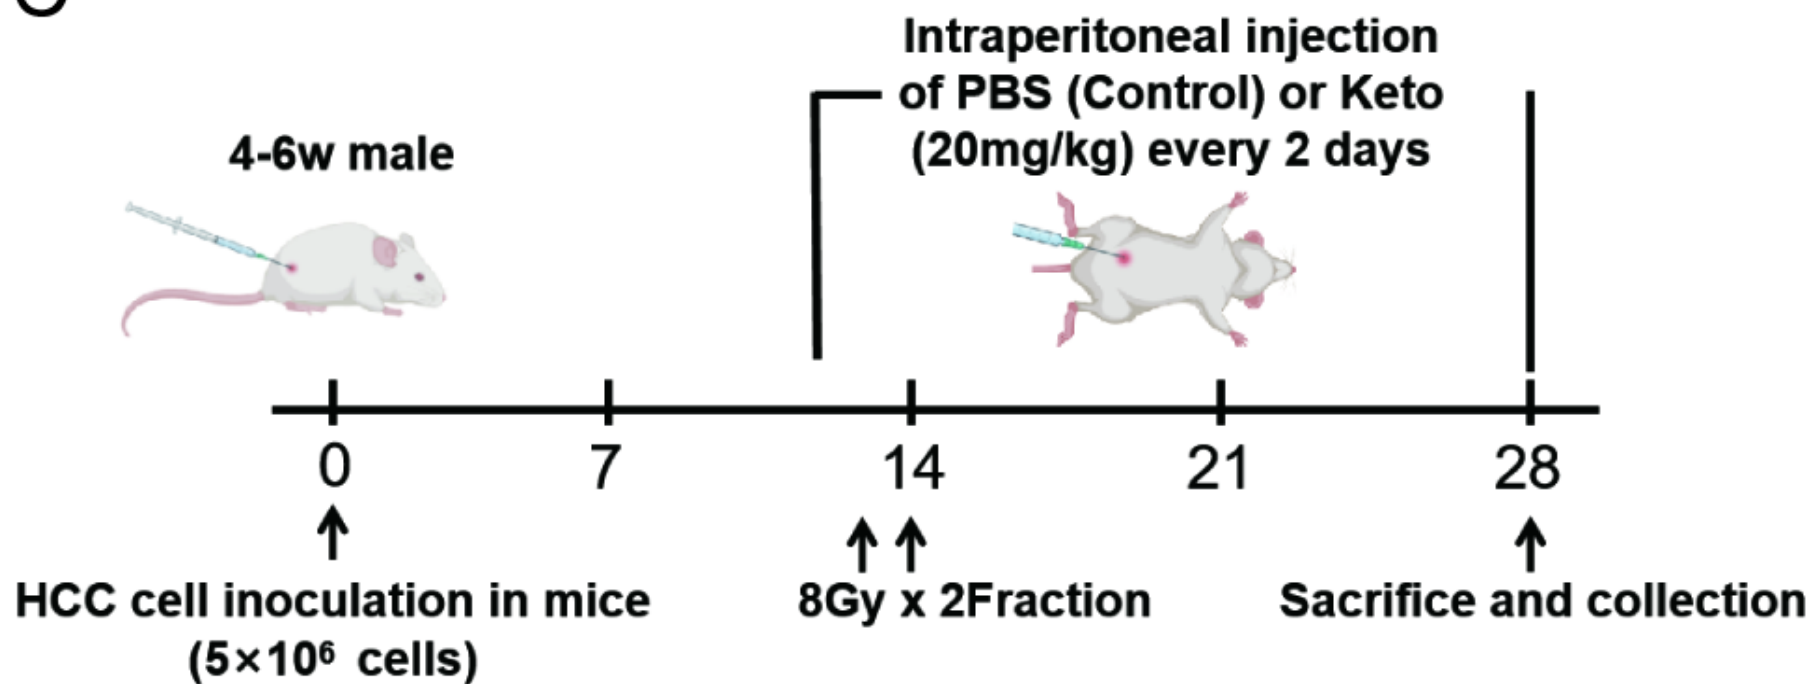

**D**

MHCC97H LV-HK2 (nude mice)

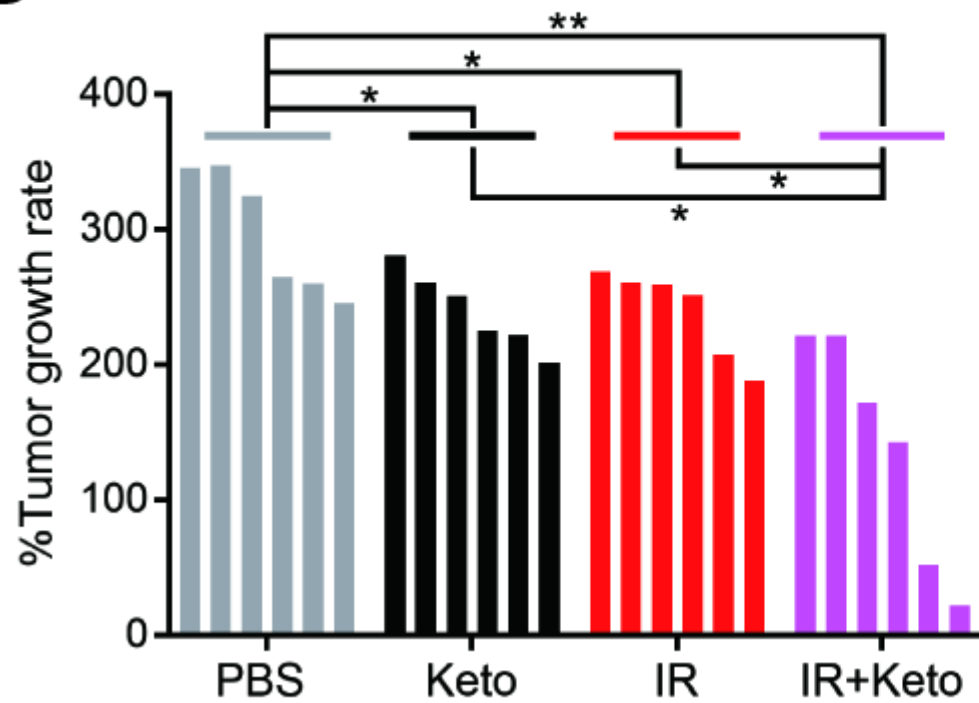

| IR   | - | - | + | + |
|------|---|---|---|---|
| Keto | - | + | - | + |

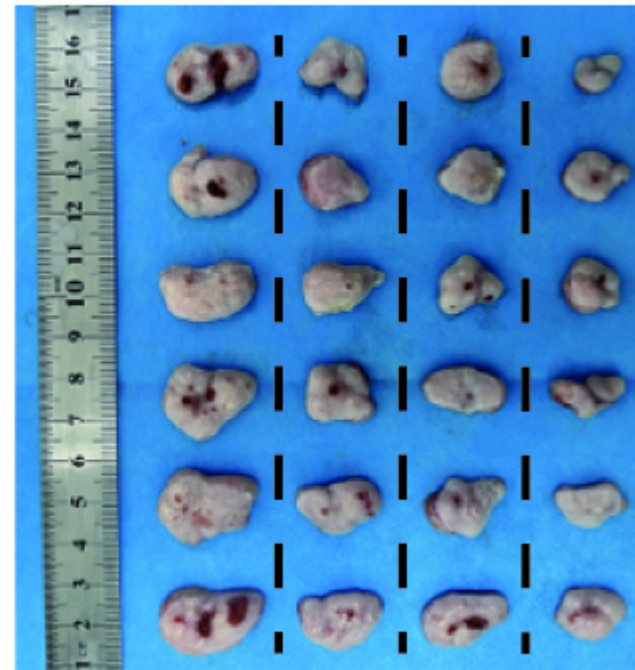

E

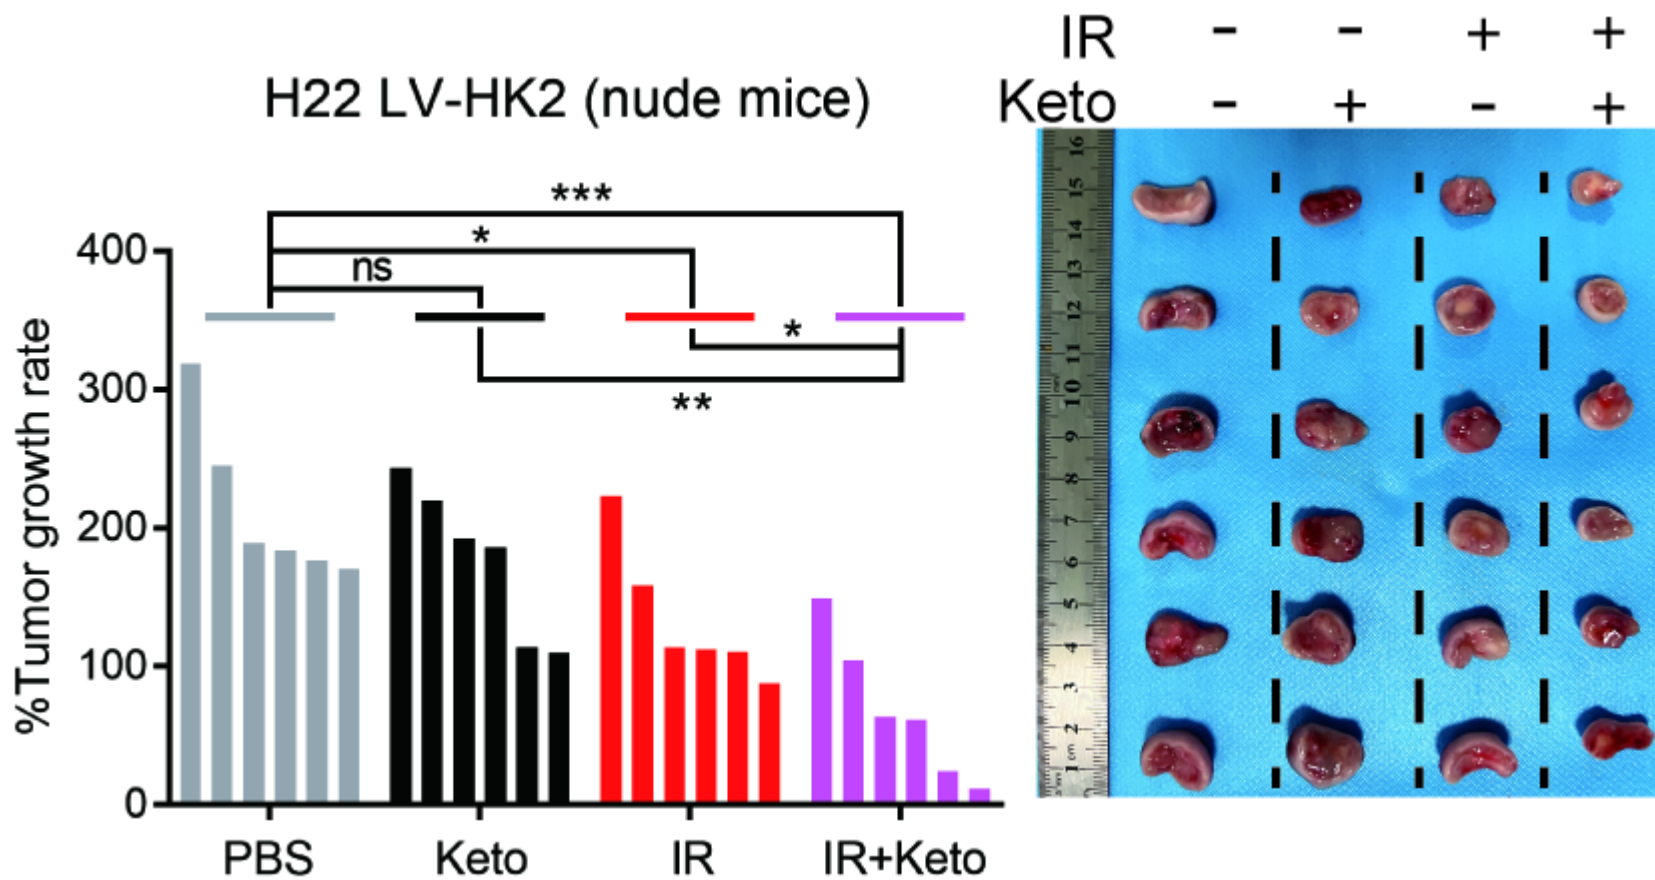

F

H22 LV-HK2 (C57 mice)

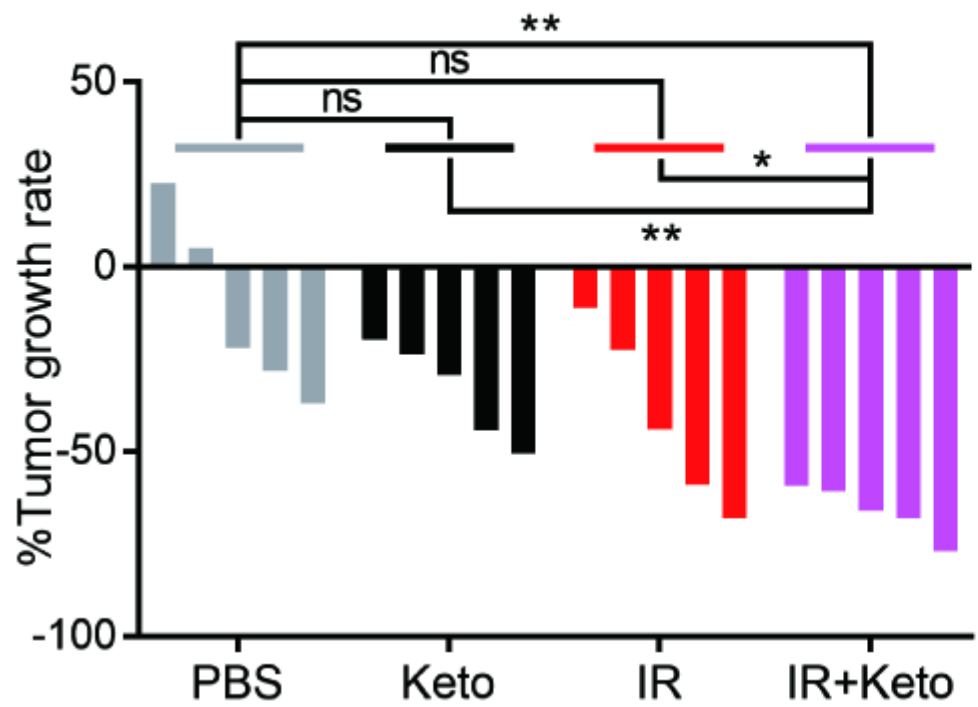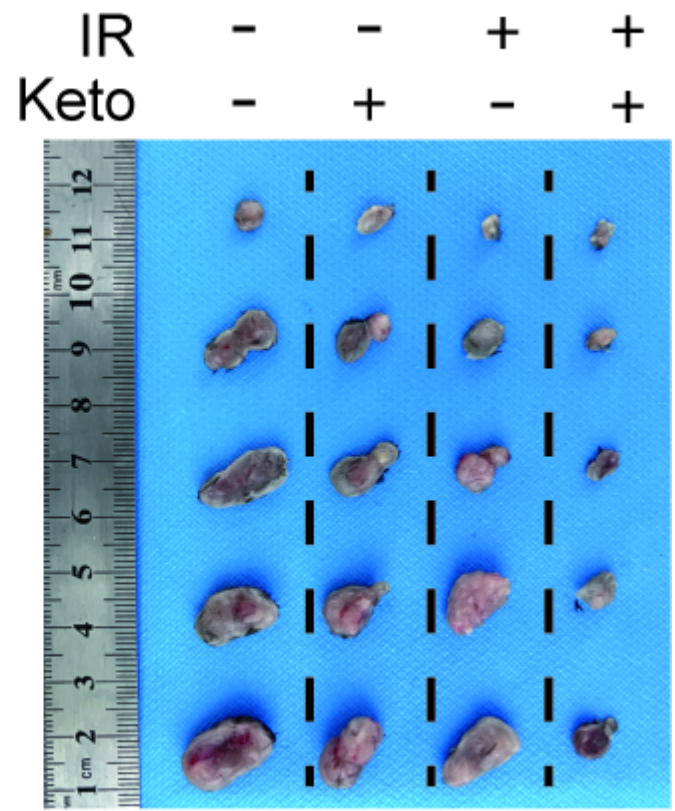

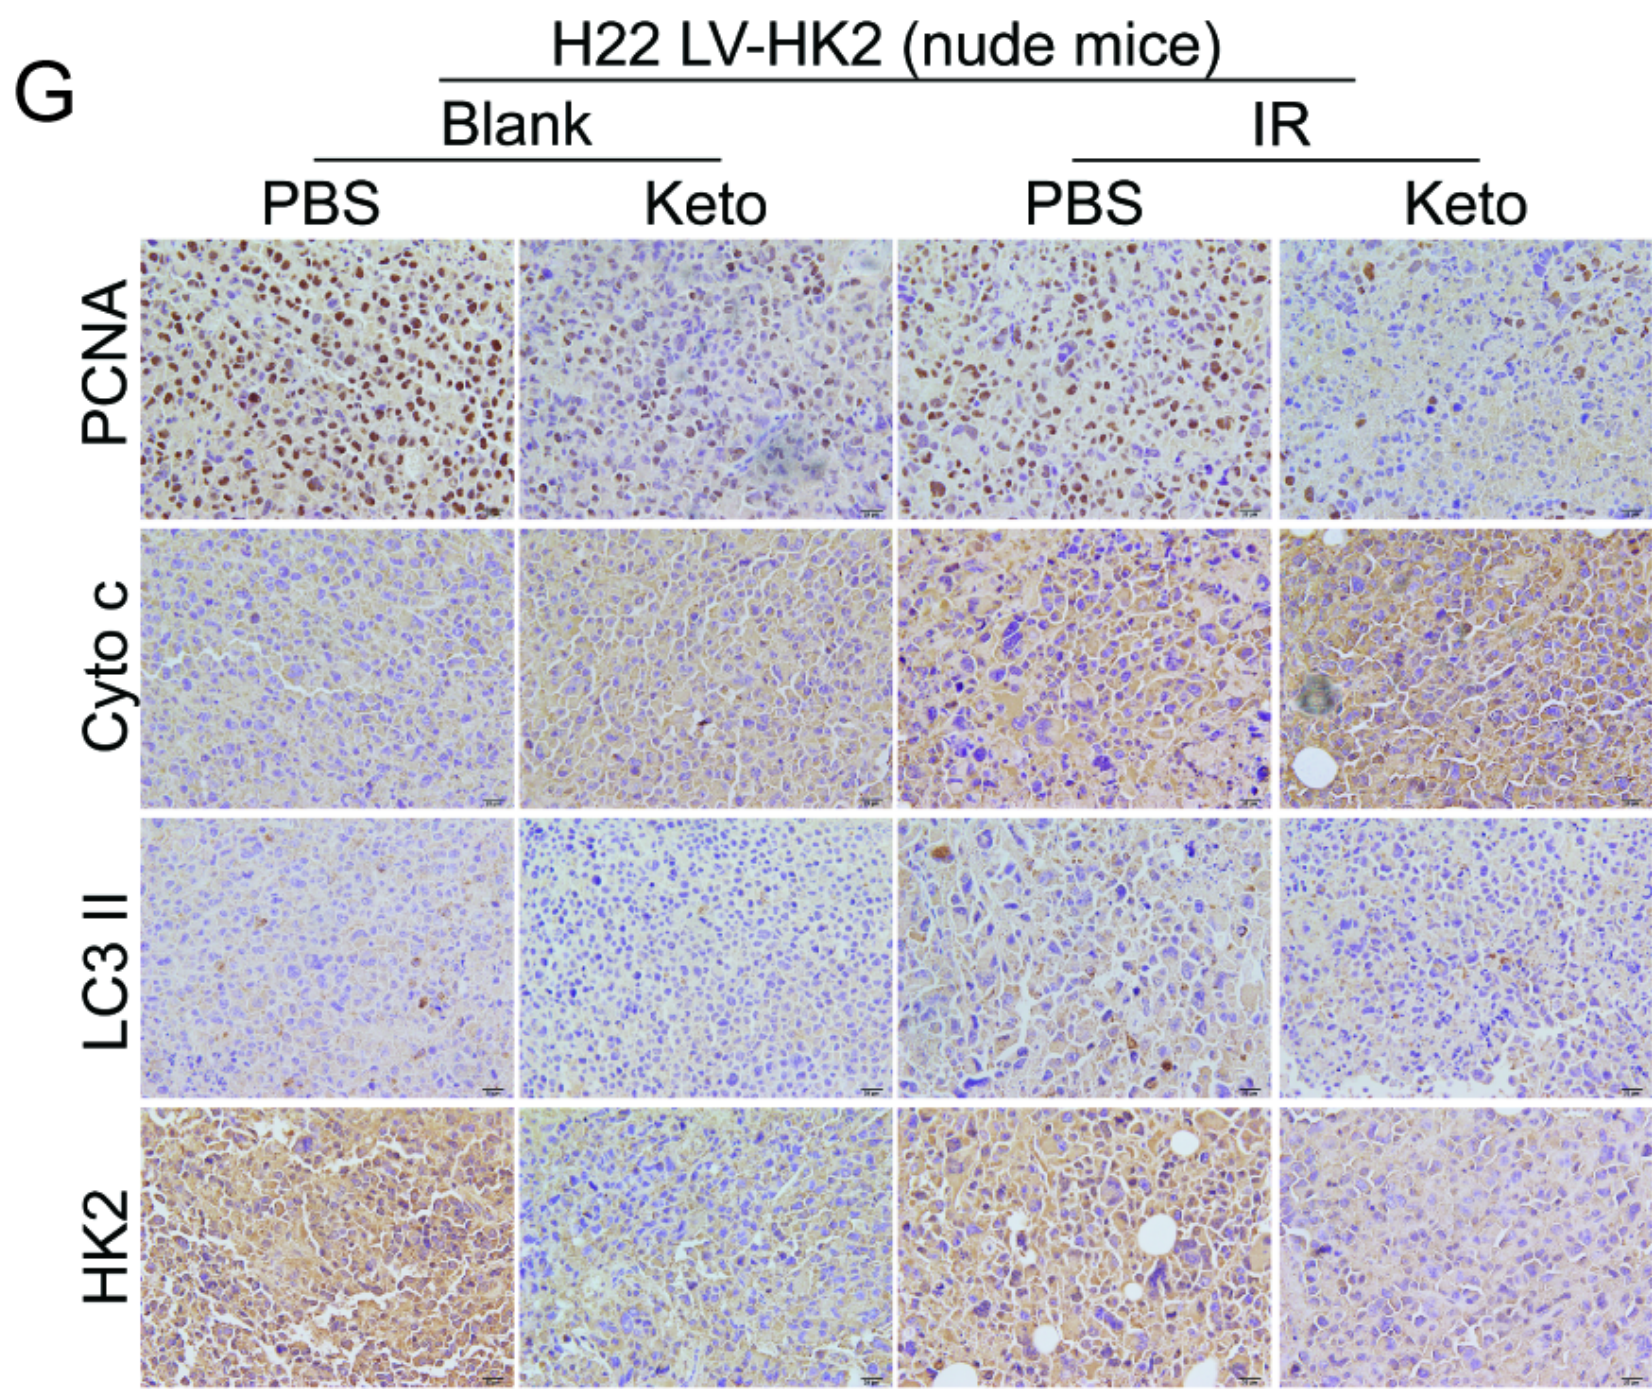

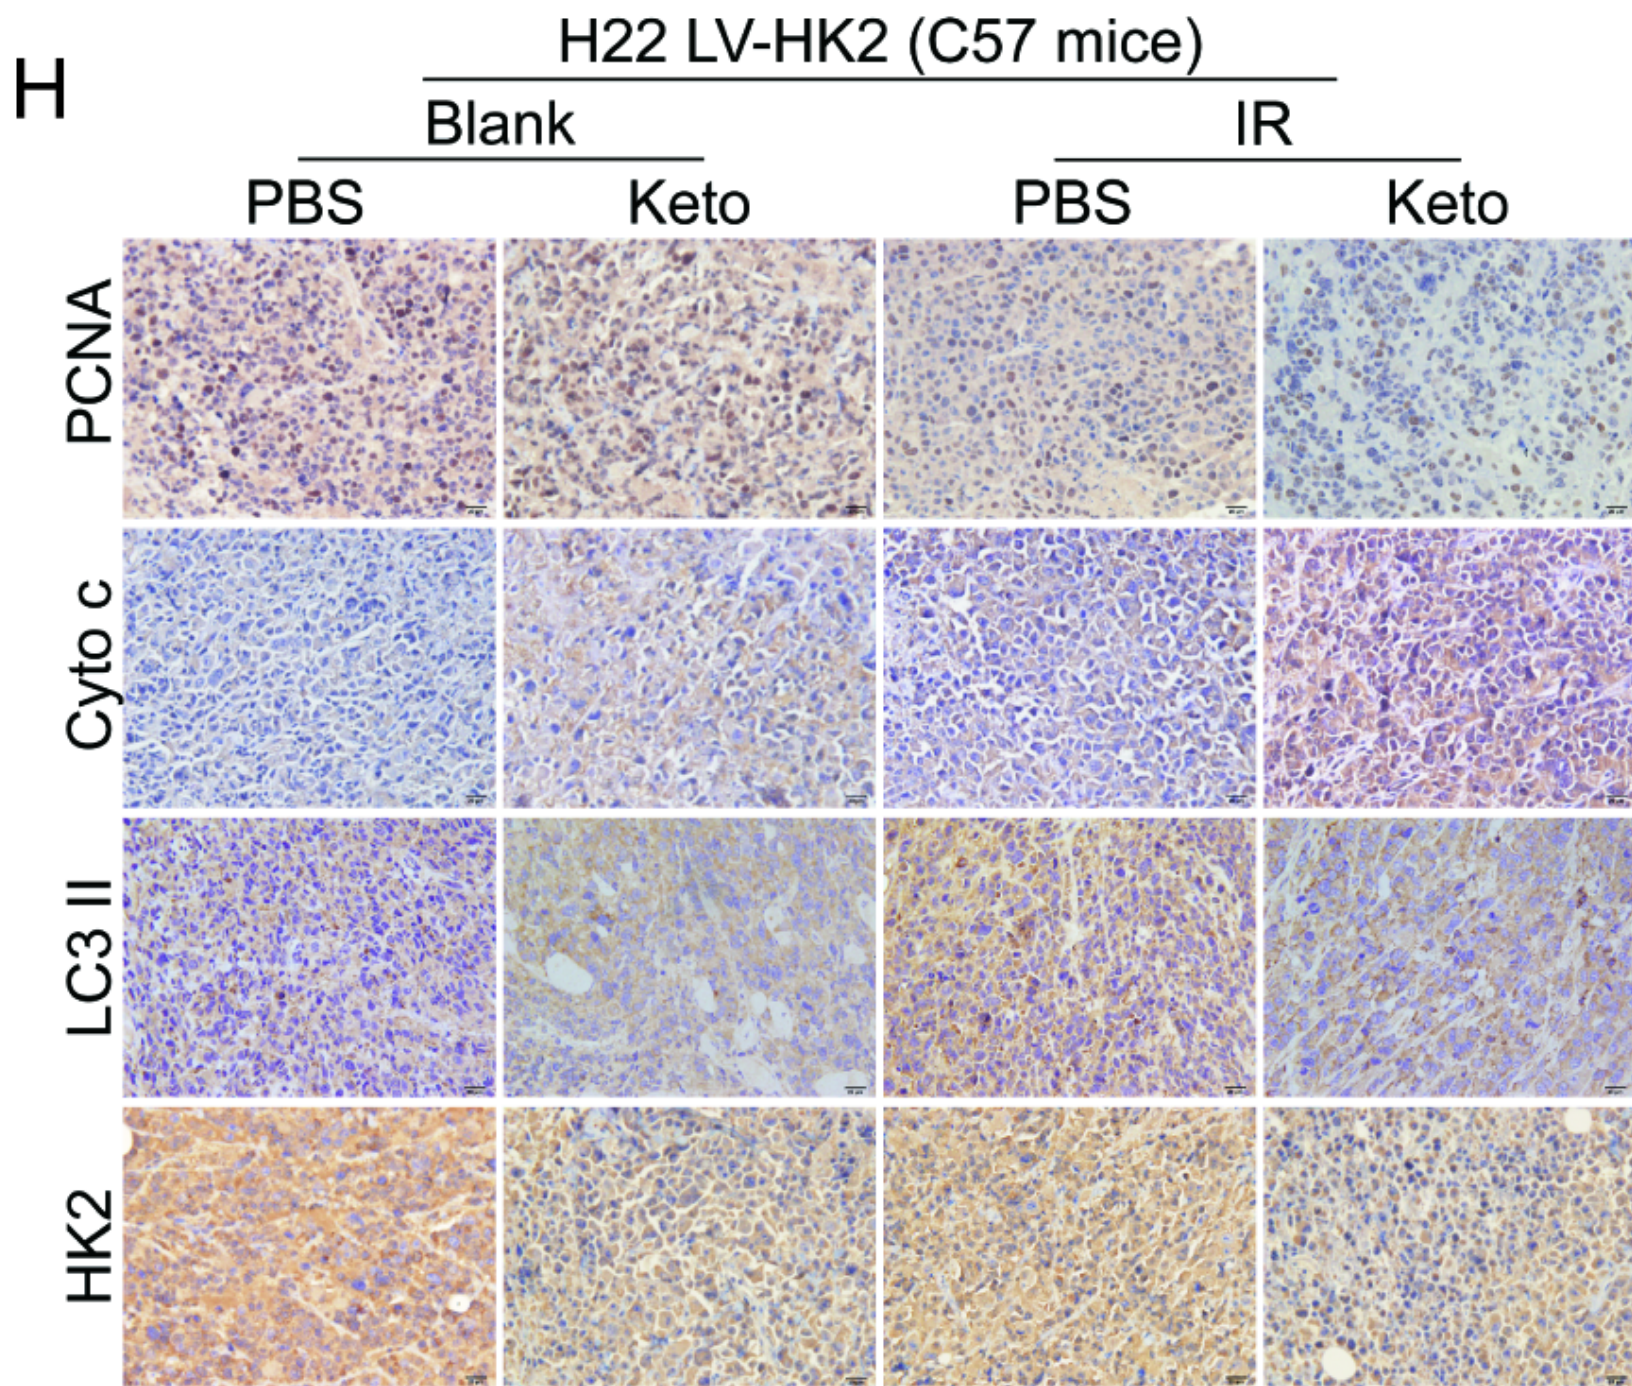



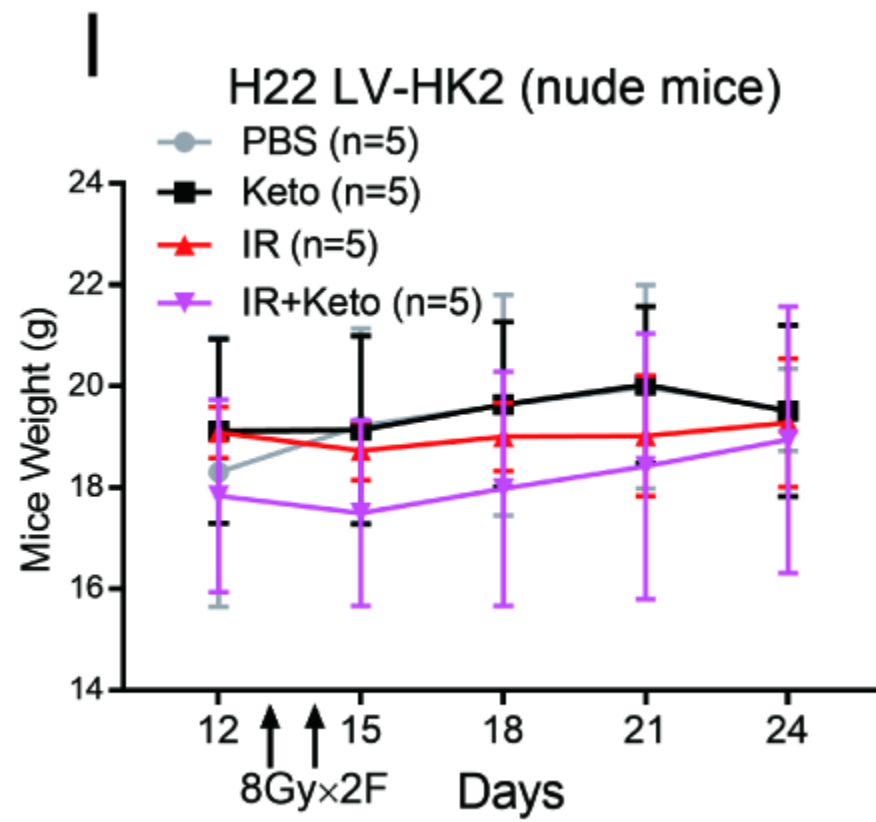

## J H22 LV-HK2 (nude mice)

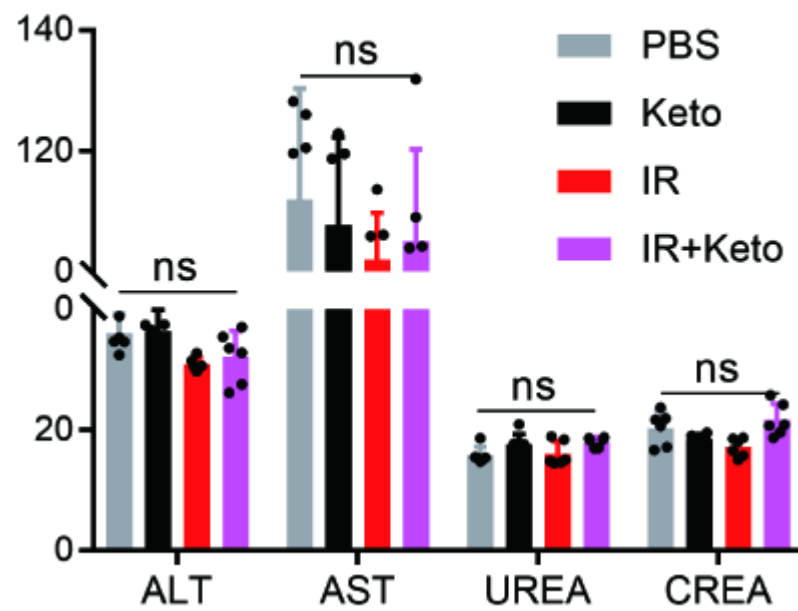

# K

## H22 LV-HK2 (C57 mice)

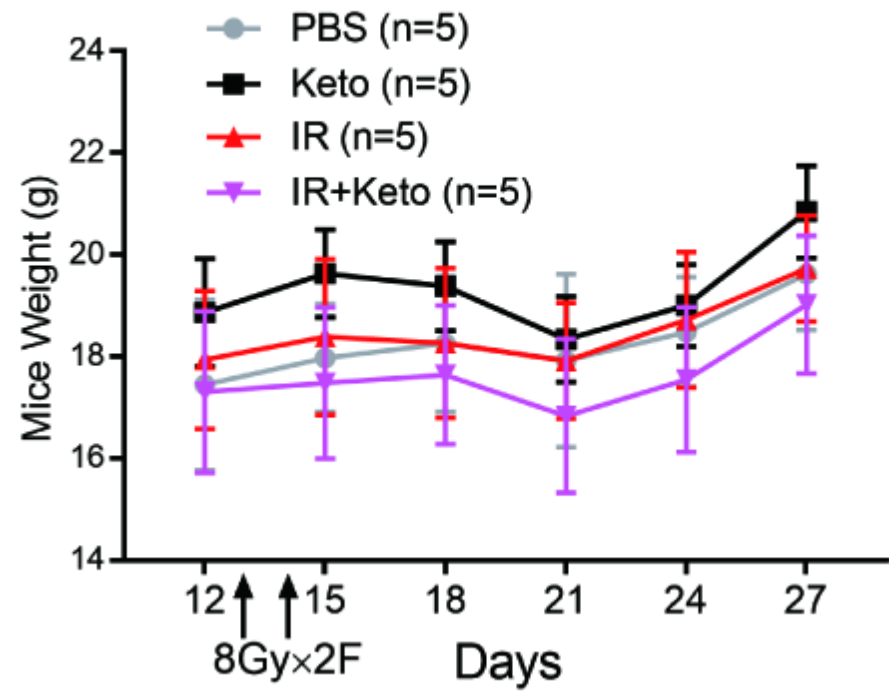

L H22 LV-HK2 (C57 mice)

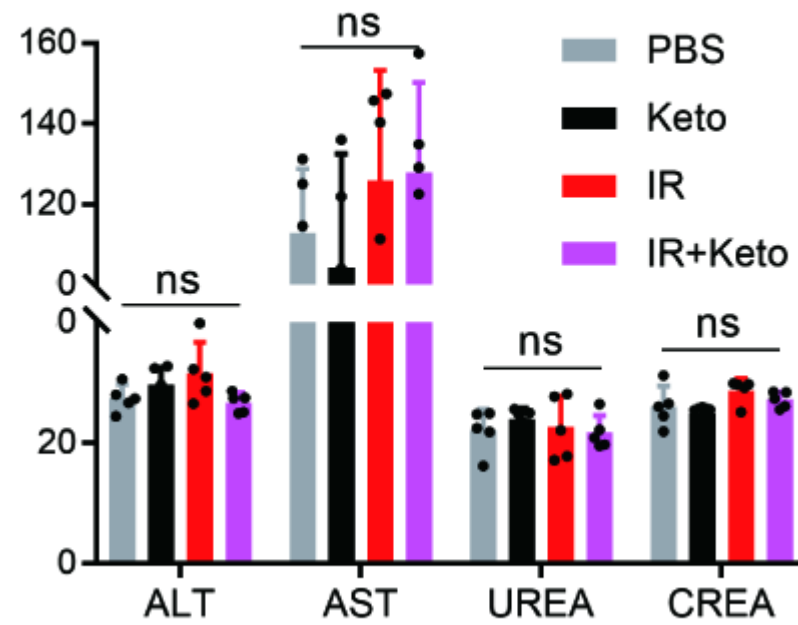

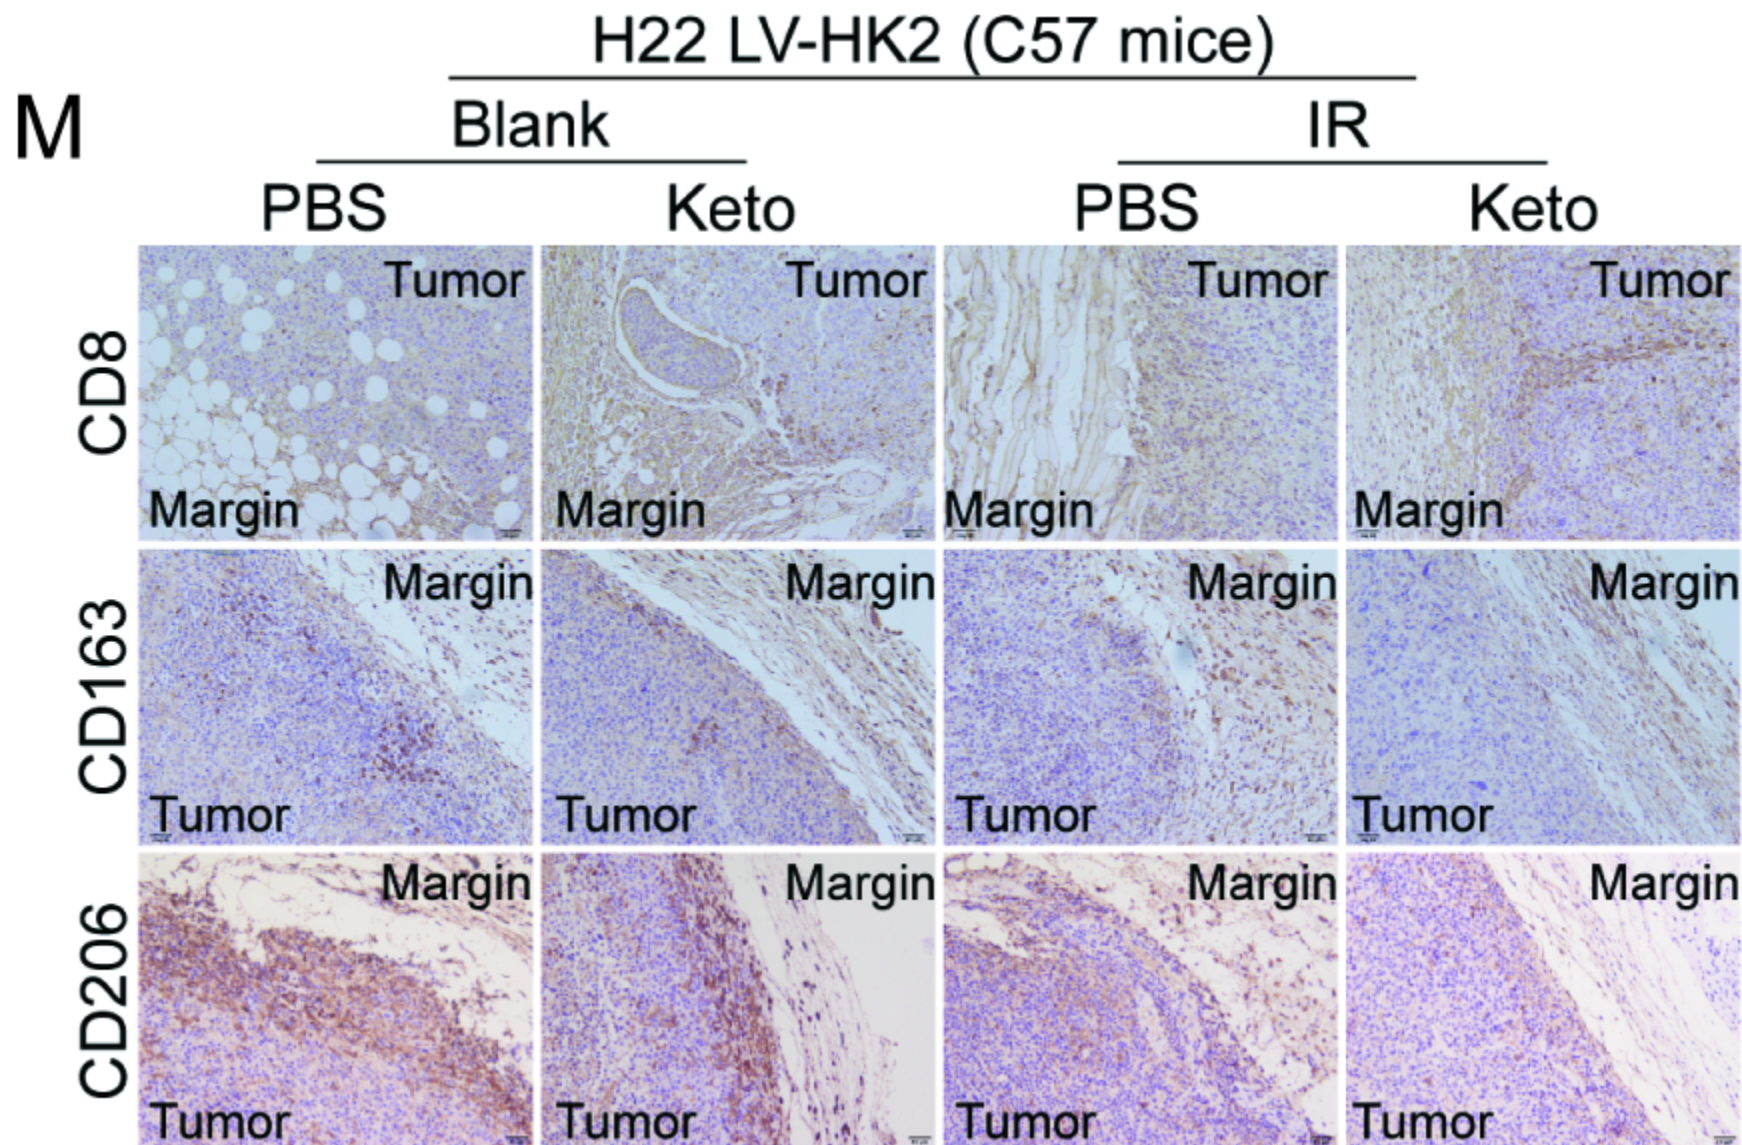



O

H22 LV-HK2  
(C57 mice)

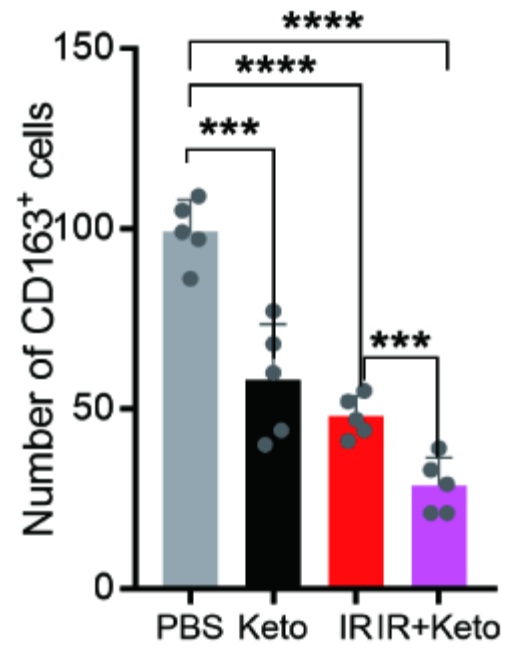

P

H22 LV-HK2  
(C57 mice)

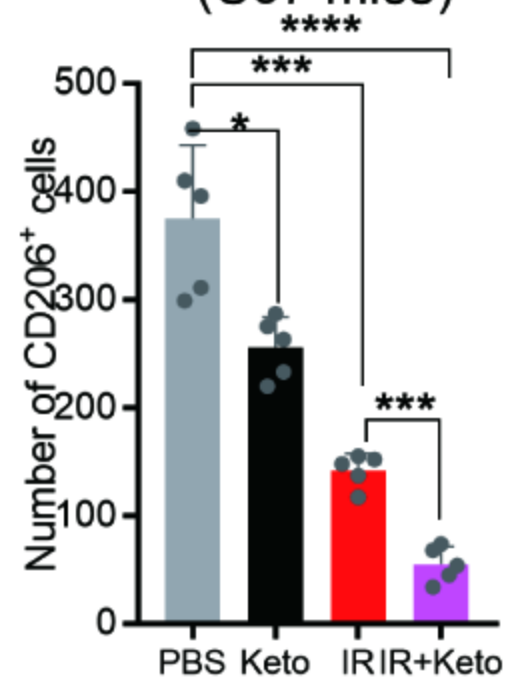



Q

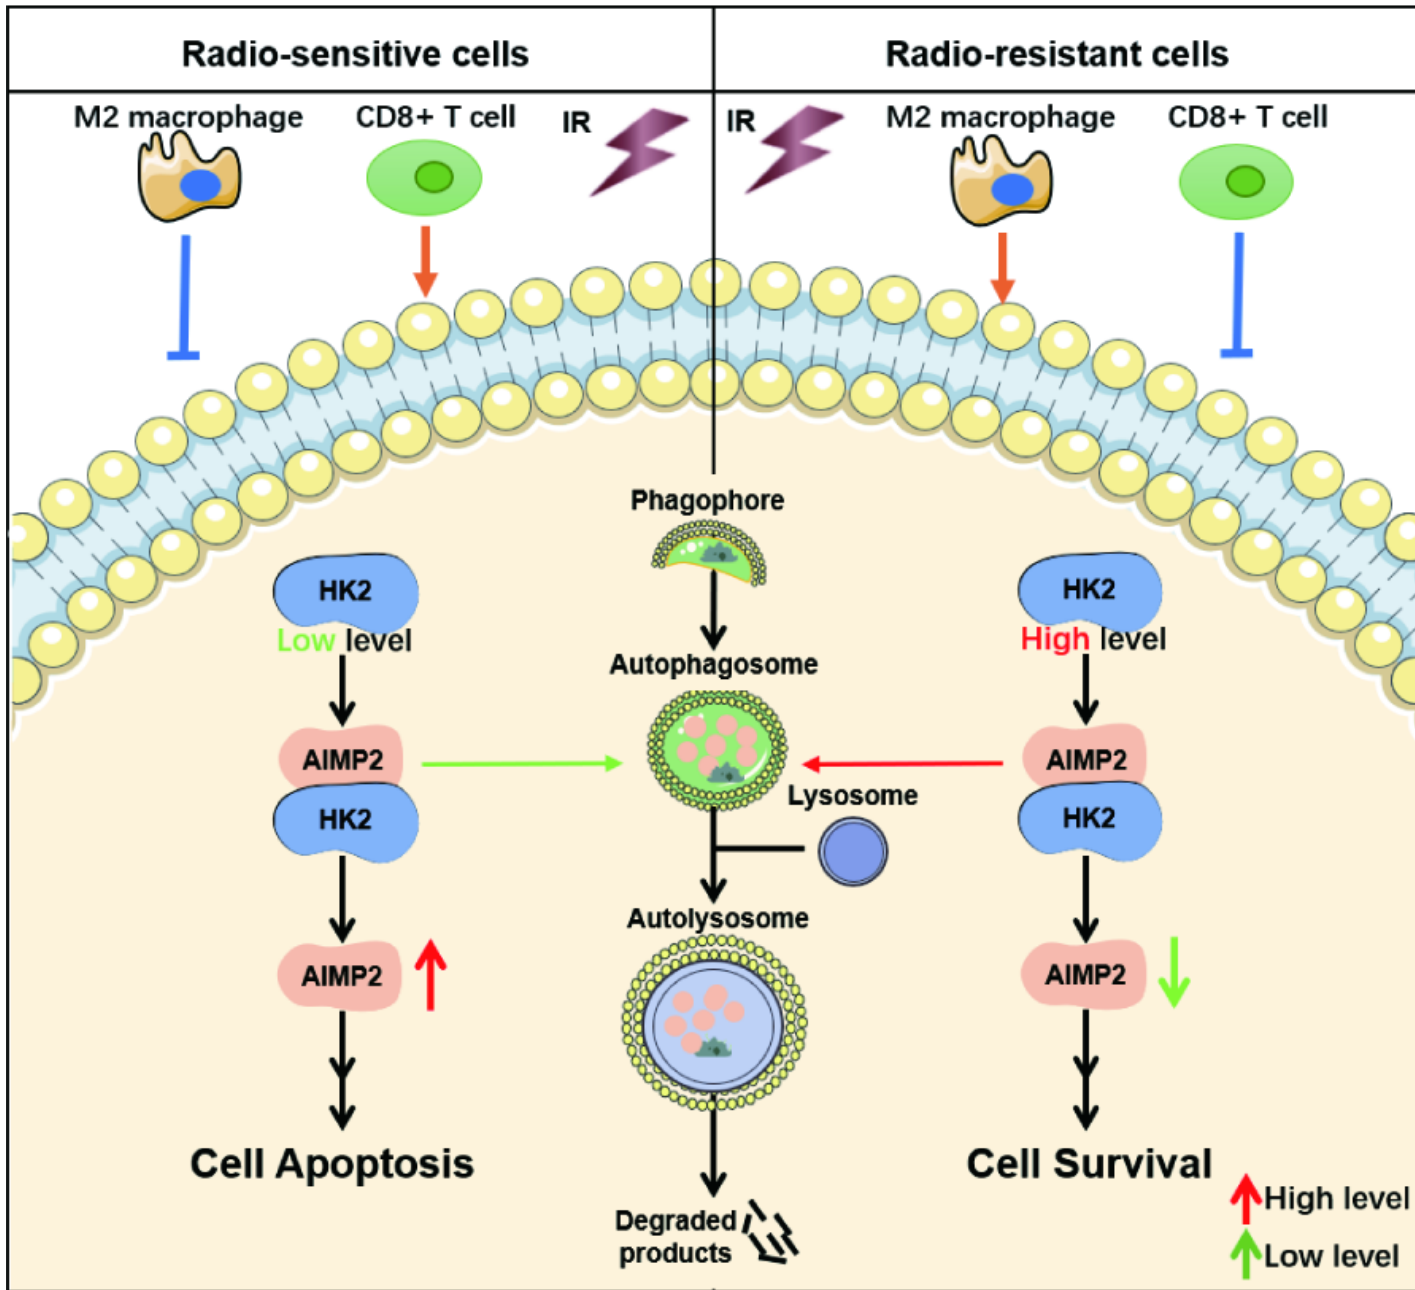

Supplement: 41419_2023_6009_MOESM6_ESM.pdf [file 41419_2023_6009_MOESM6_ESM.pdf]
