# Supplementary material for: Hexokinase 2 confers radio-resistance in hepatocellular carcinoma by promoting autophagy-dependent degradation of AIMP2
Source: PubMed Central journal article supplement (PMC10390495; doi:10.1038/s41419-023-06009-2), 2023-08-01

**B**

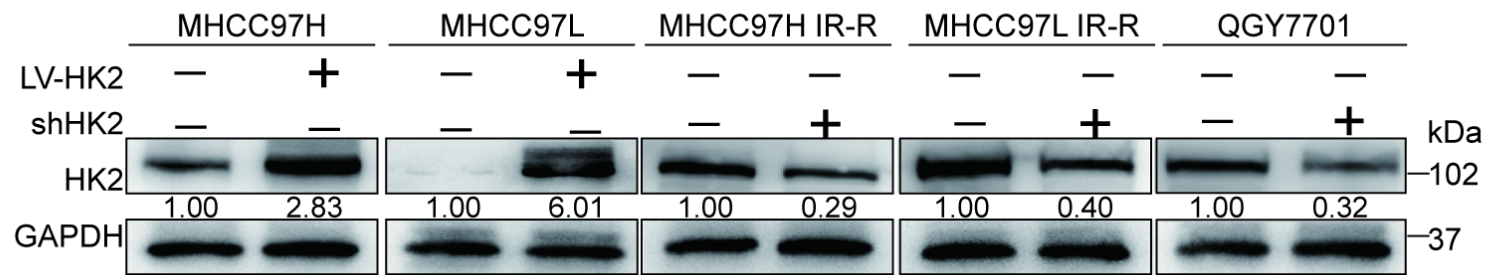

**HK2**

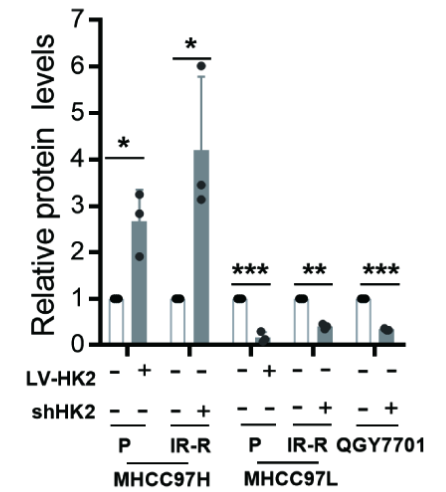

C

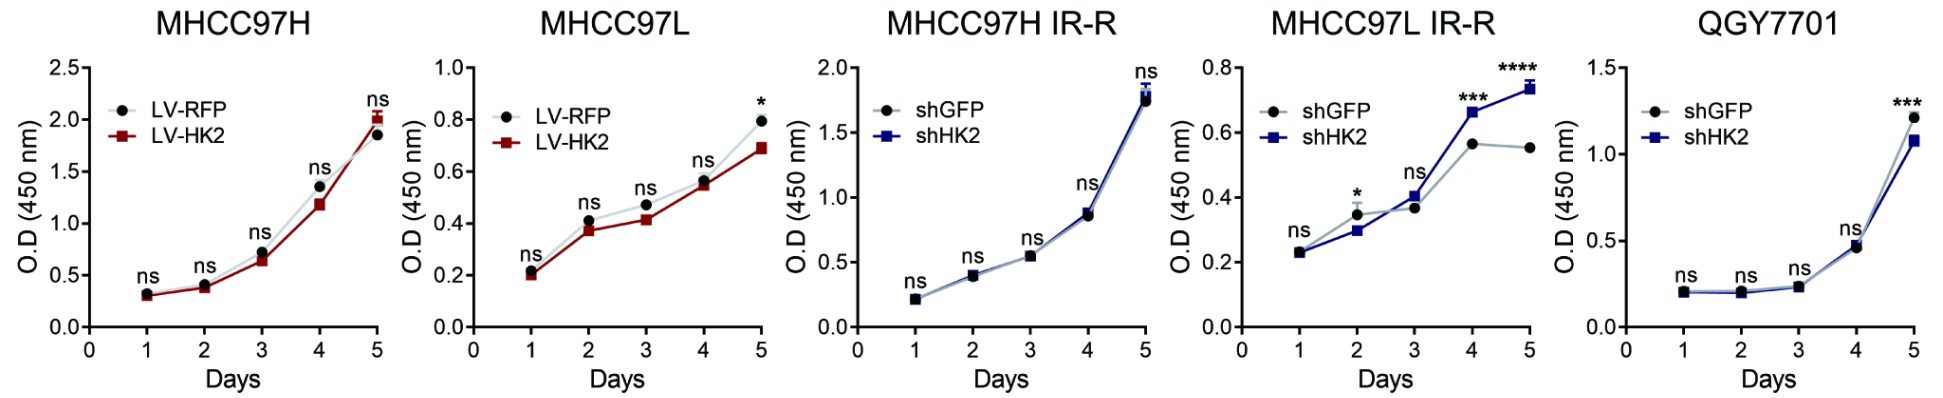

D

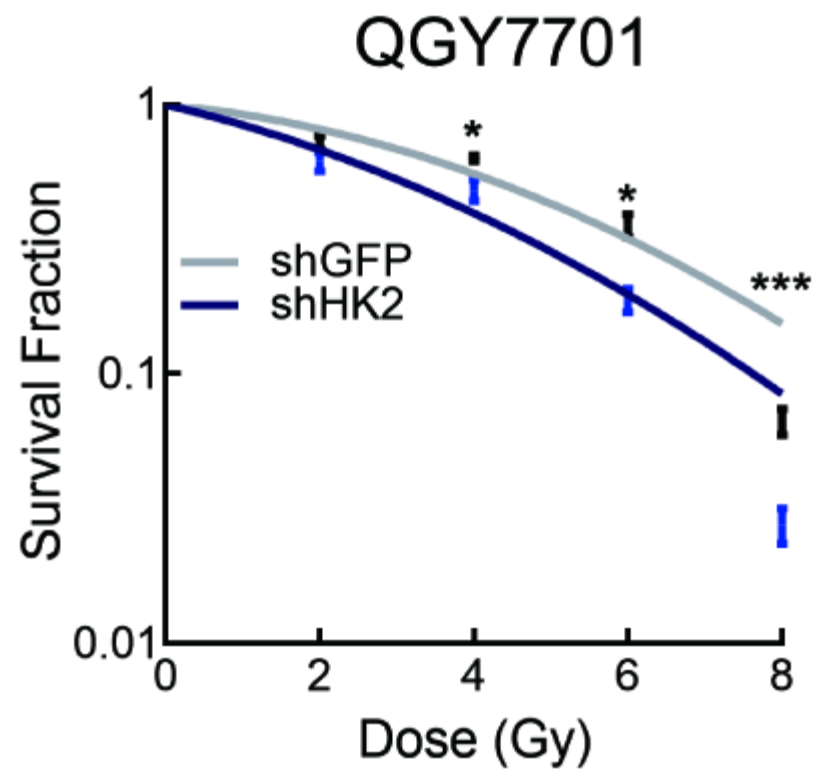

E

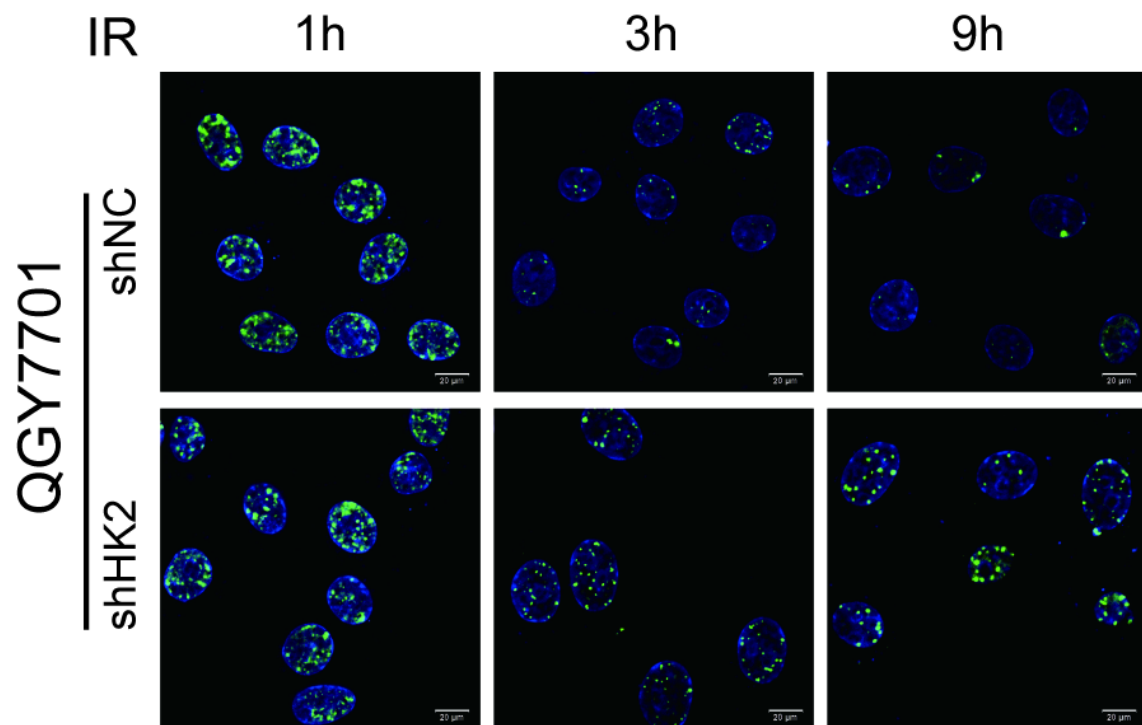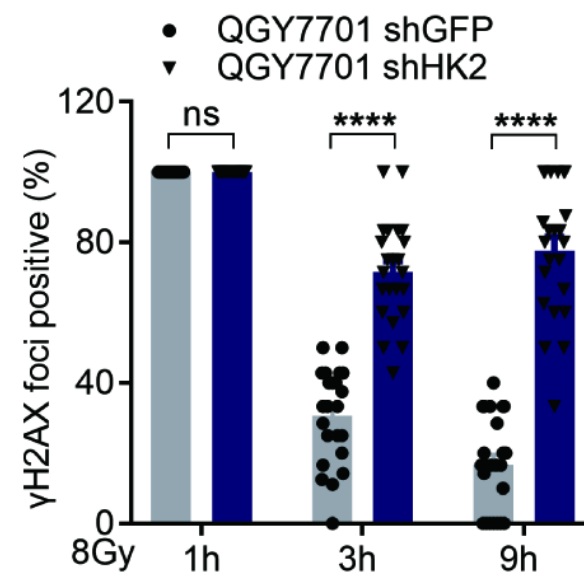

F

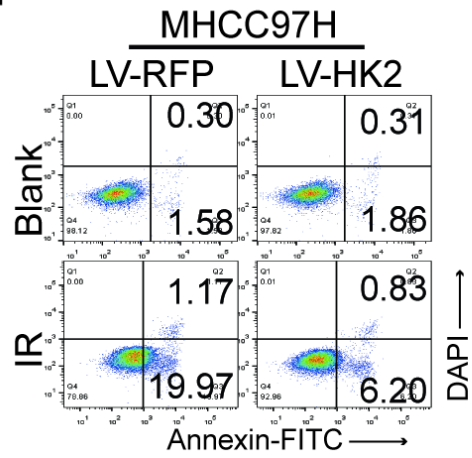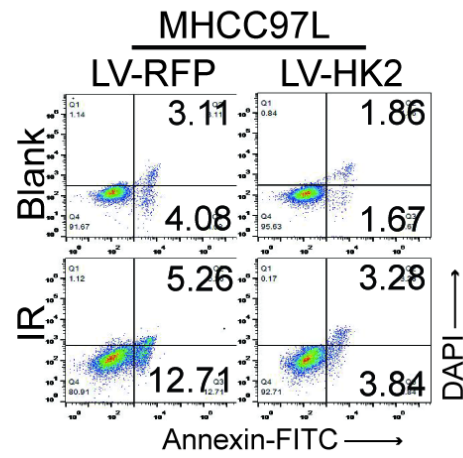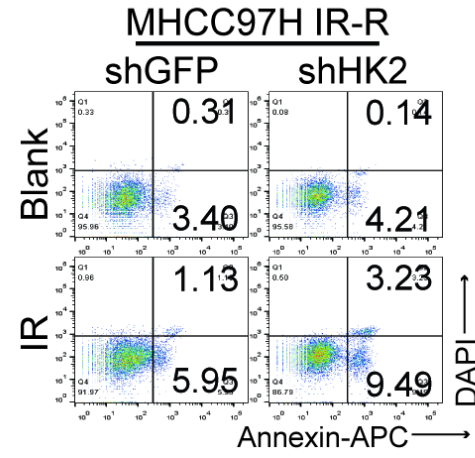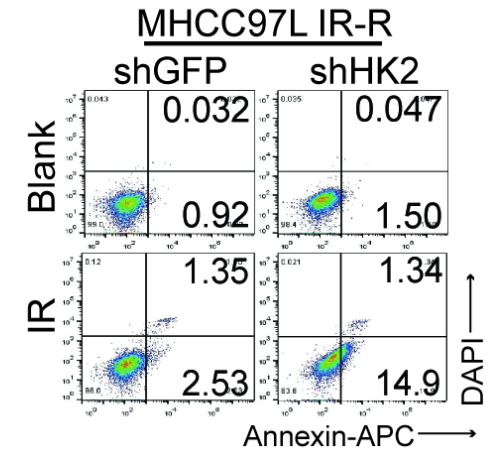

**G**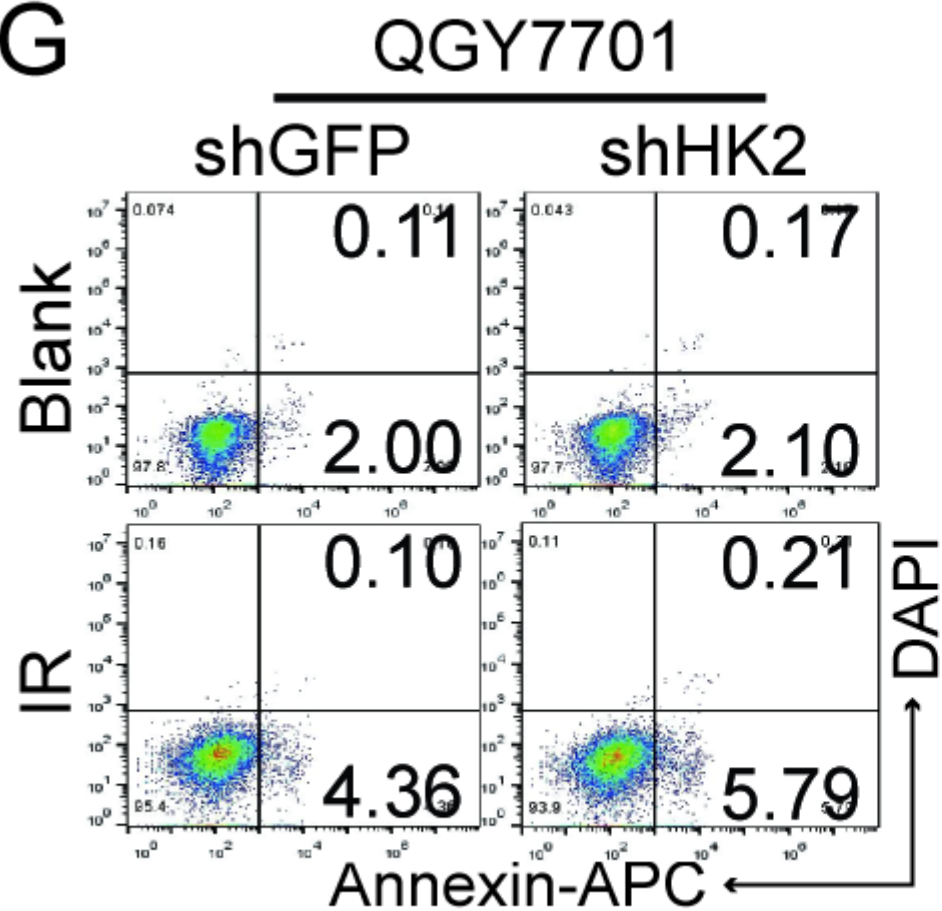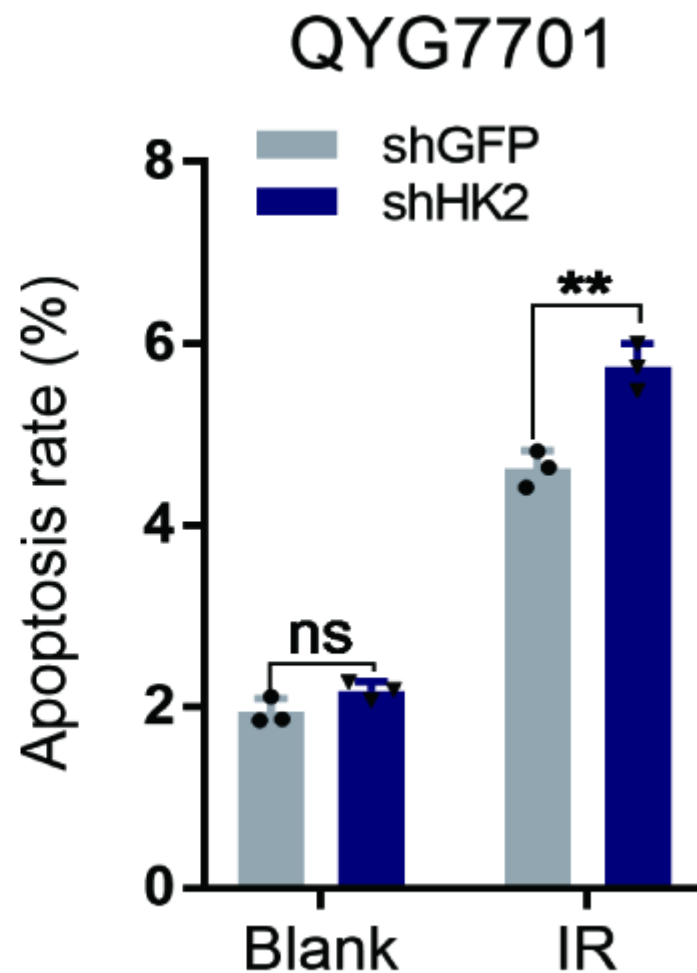

# H

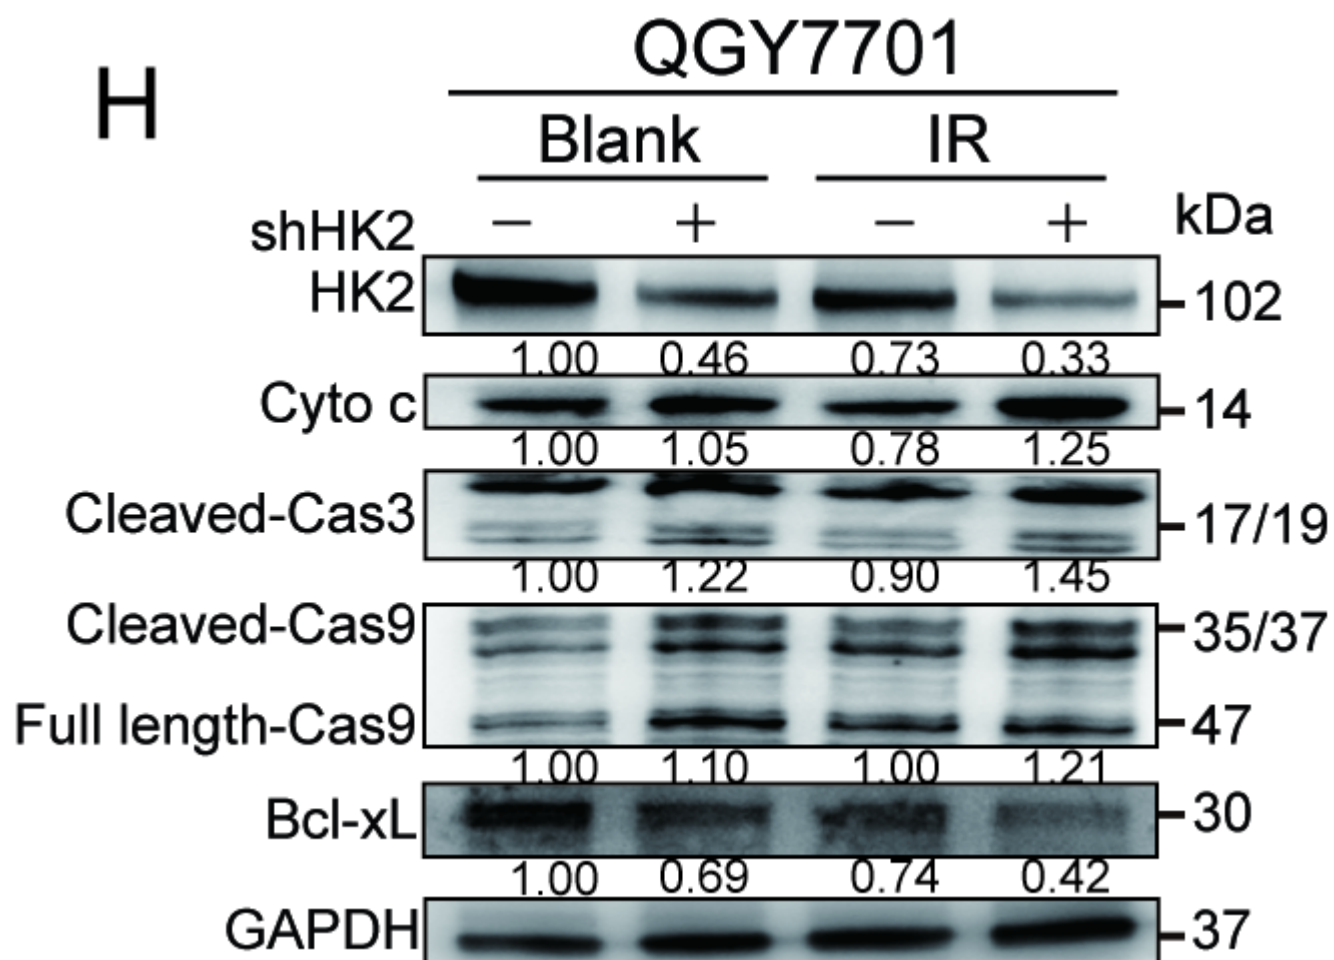



I

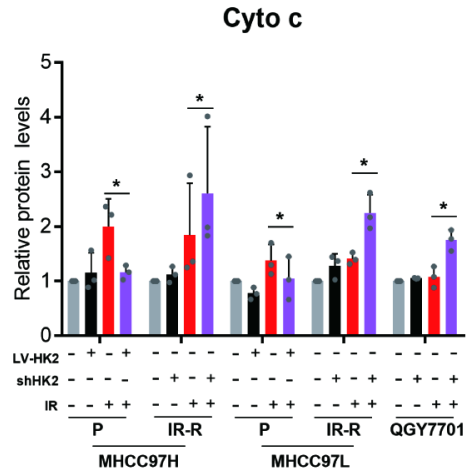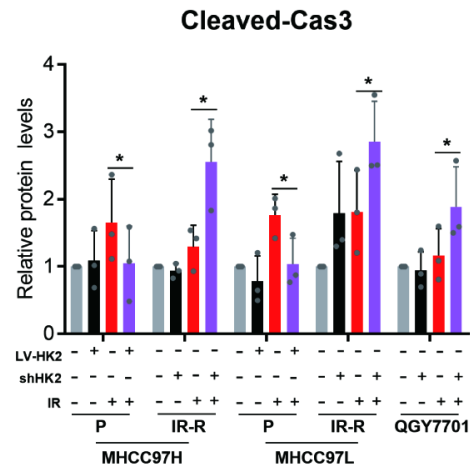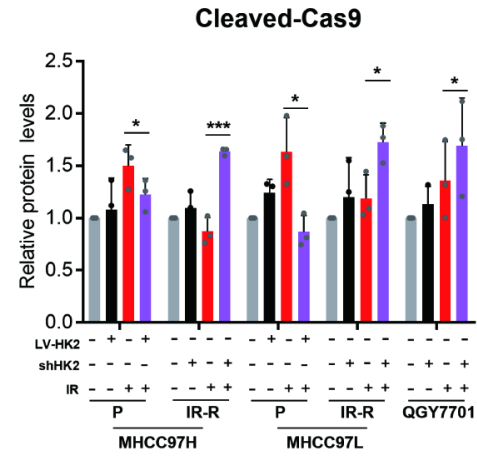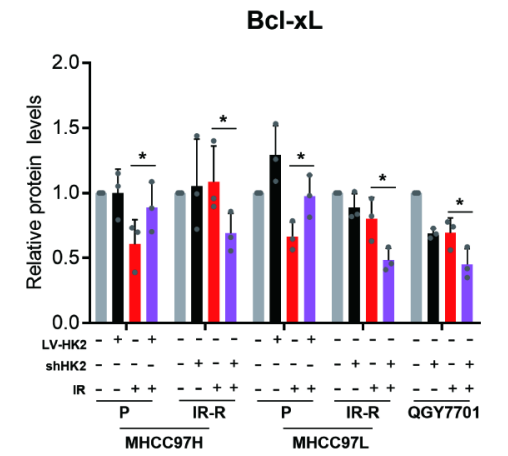

Supplement: 41419_2023_6009_MOESM15_ESM.pdf [file 41419_2023_6009_MOESM15_ESM.pdf]
