# Supplementary material for: Hexokinase 2 confers radio-resistance in hepatocellular carcinoma by promoting autophagy-dependent degradation of AIMP2
Source: PubMed Central journal article supplement (PMC10390495; doi:10.1038/s41419-023-06009-2), 2023-08-01

A

## AIMP2 (IR)

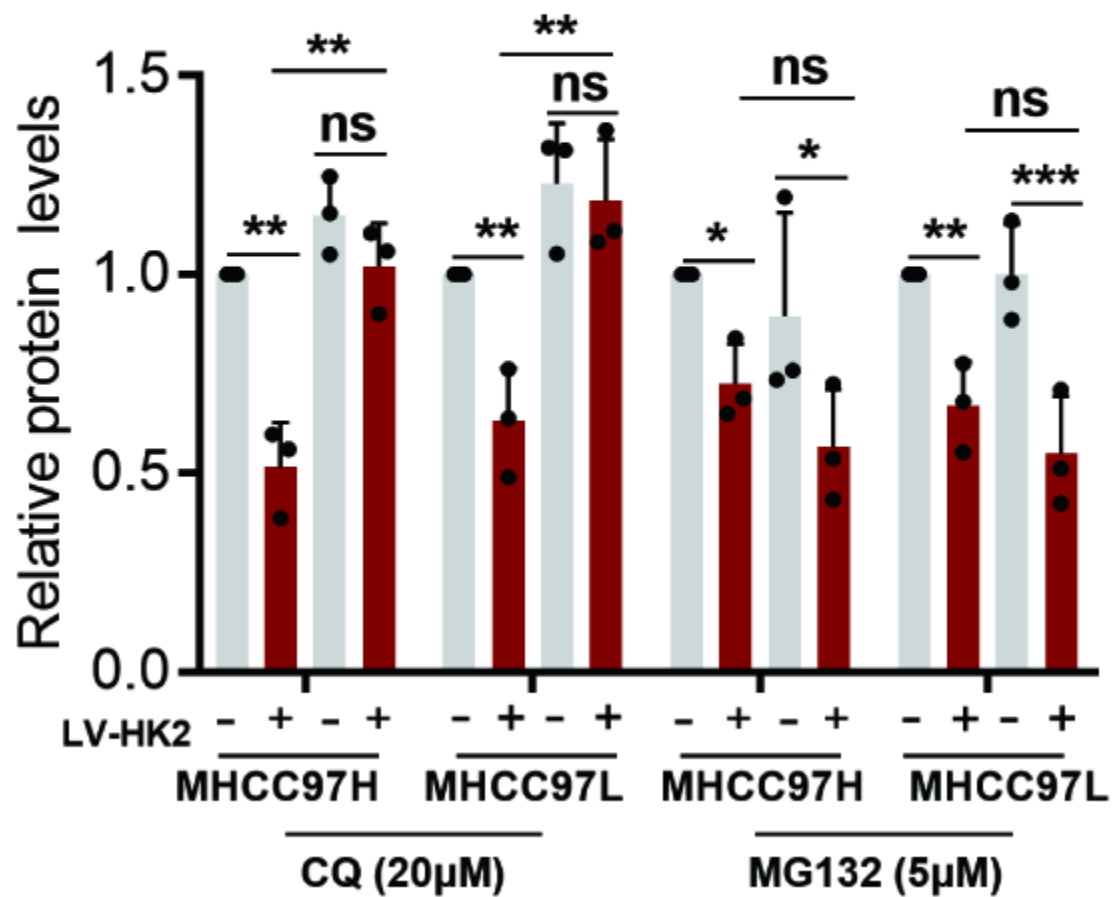

**B**

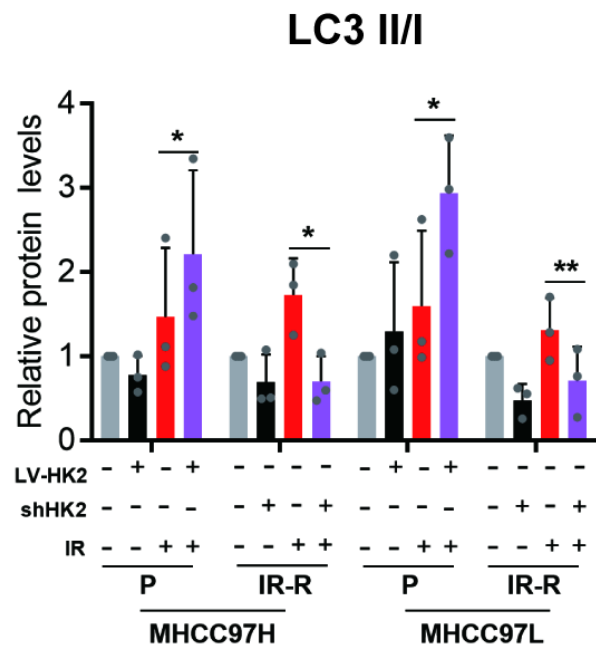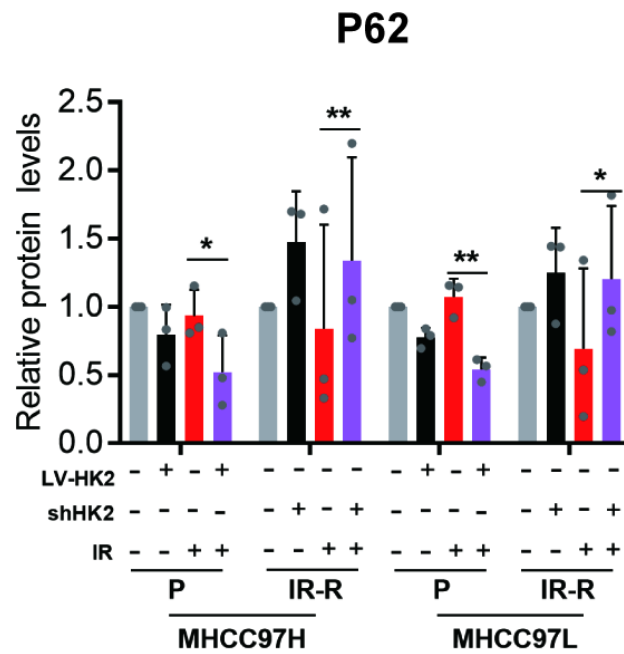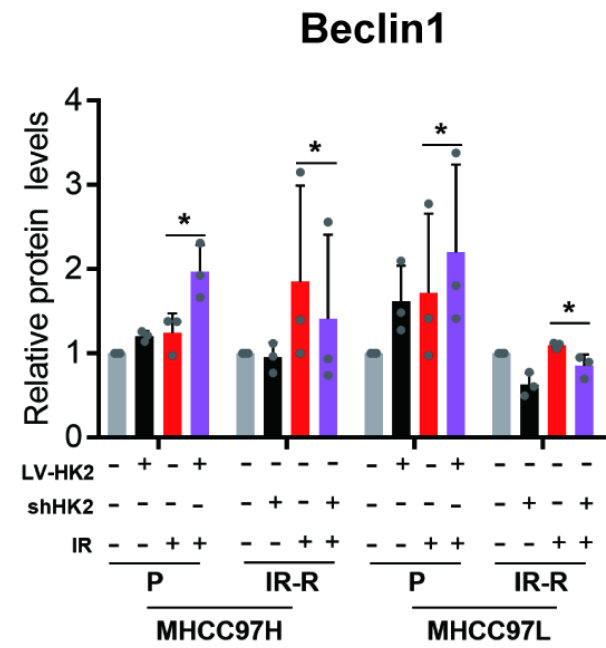

C

MHCC97L

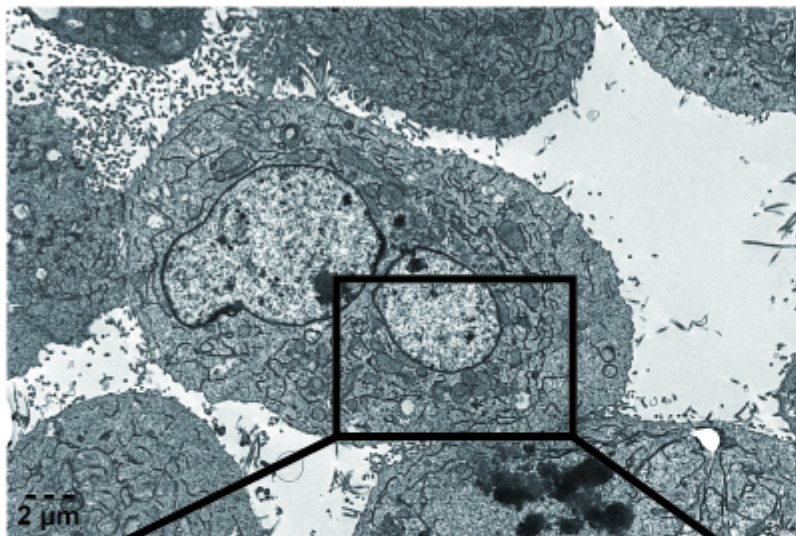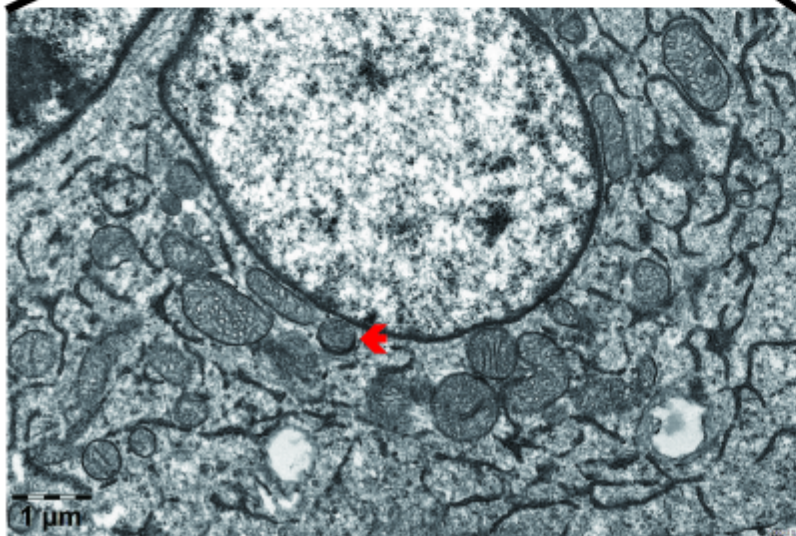

MHCC97L IR-R

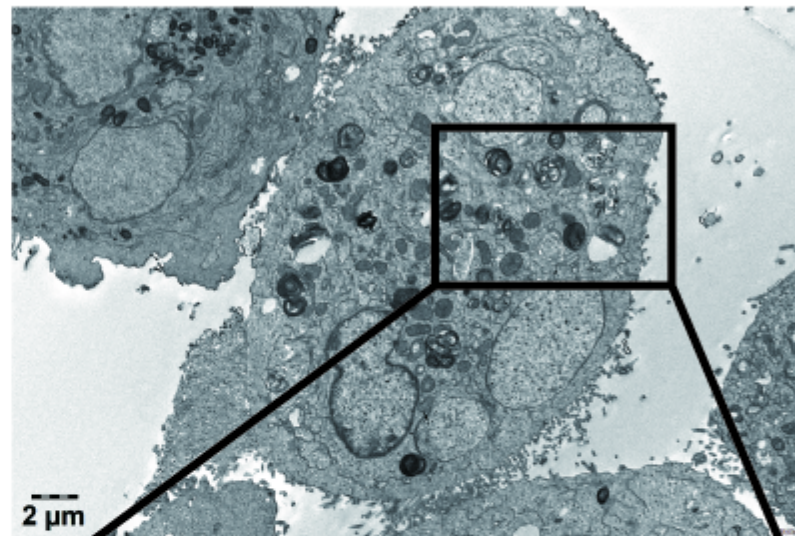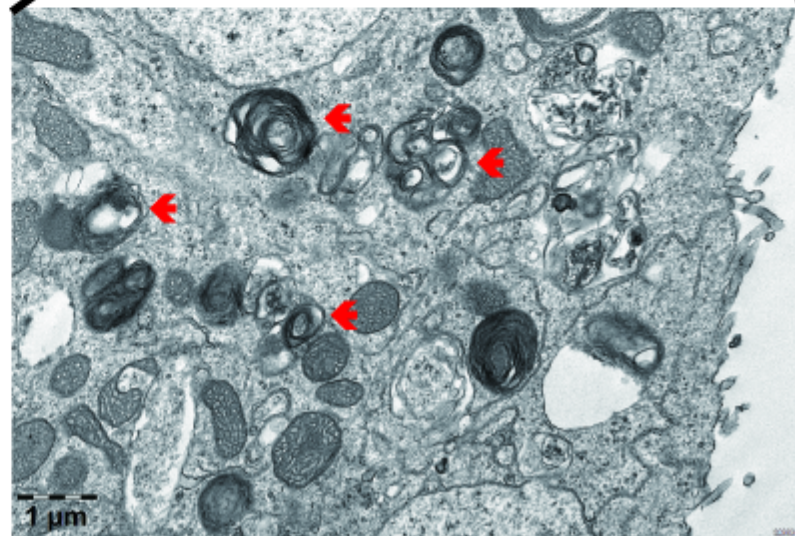

MHCC97L

D

mCherry

GFP

DAPI

Merge

Parallel

IR-R

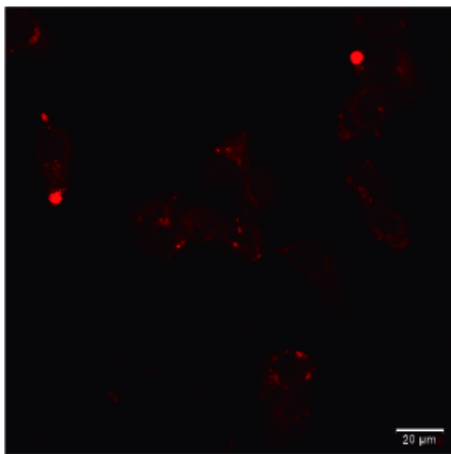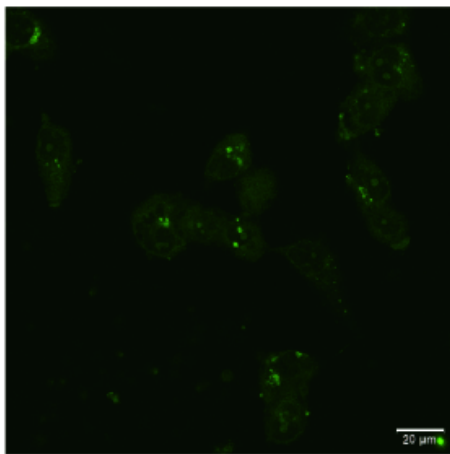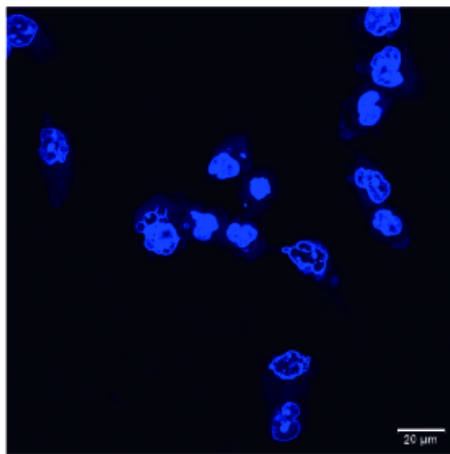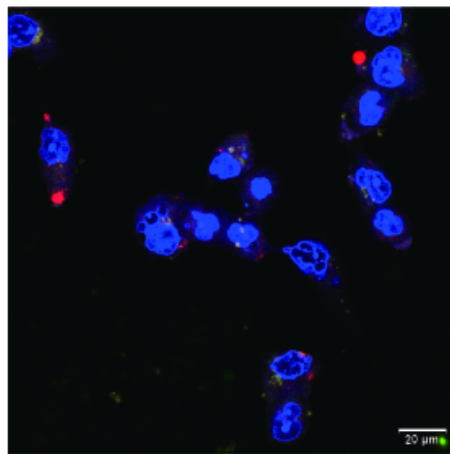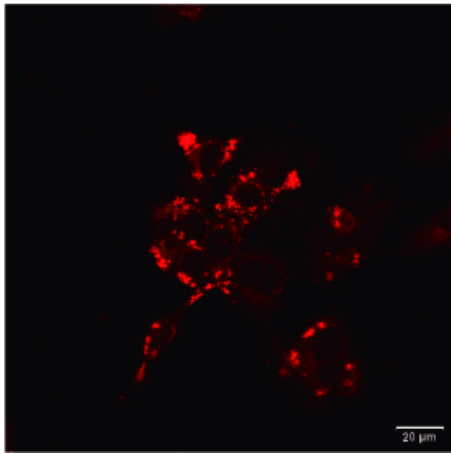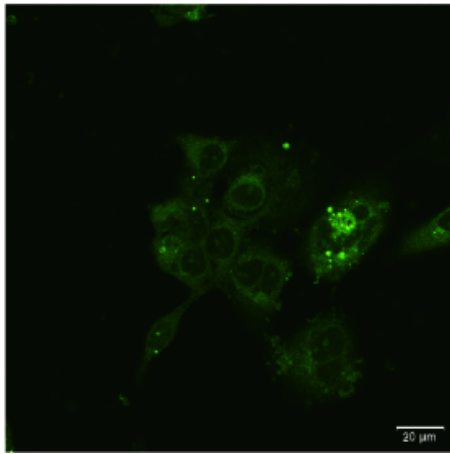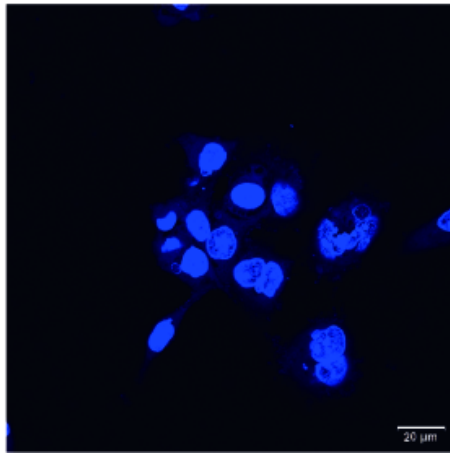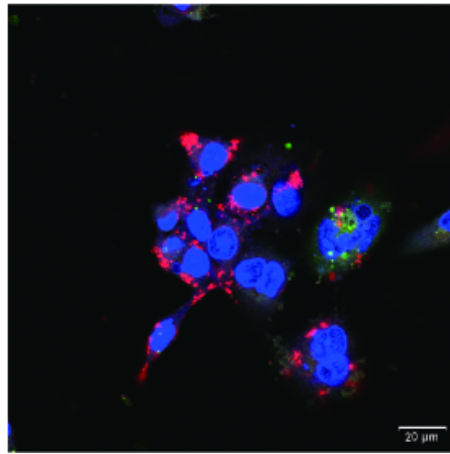

E

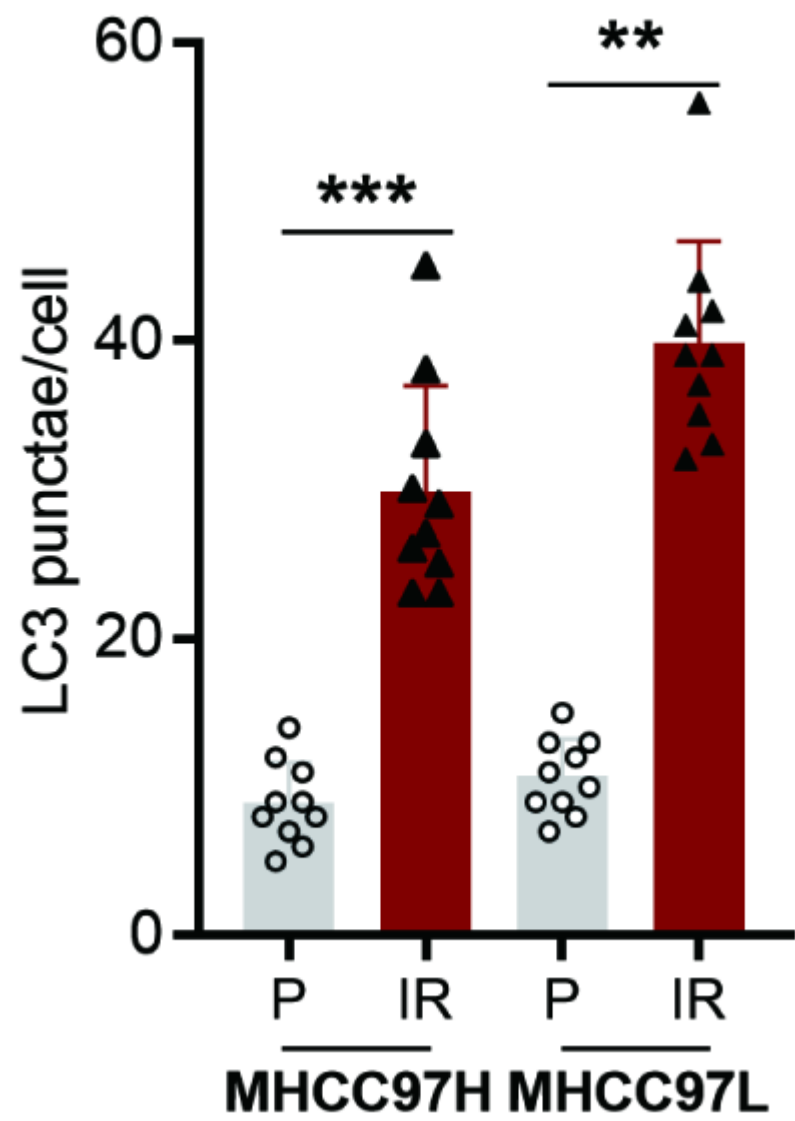

F

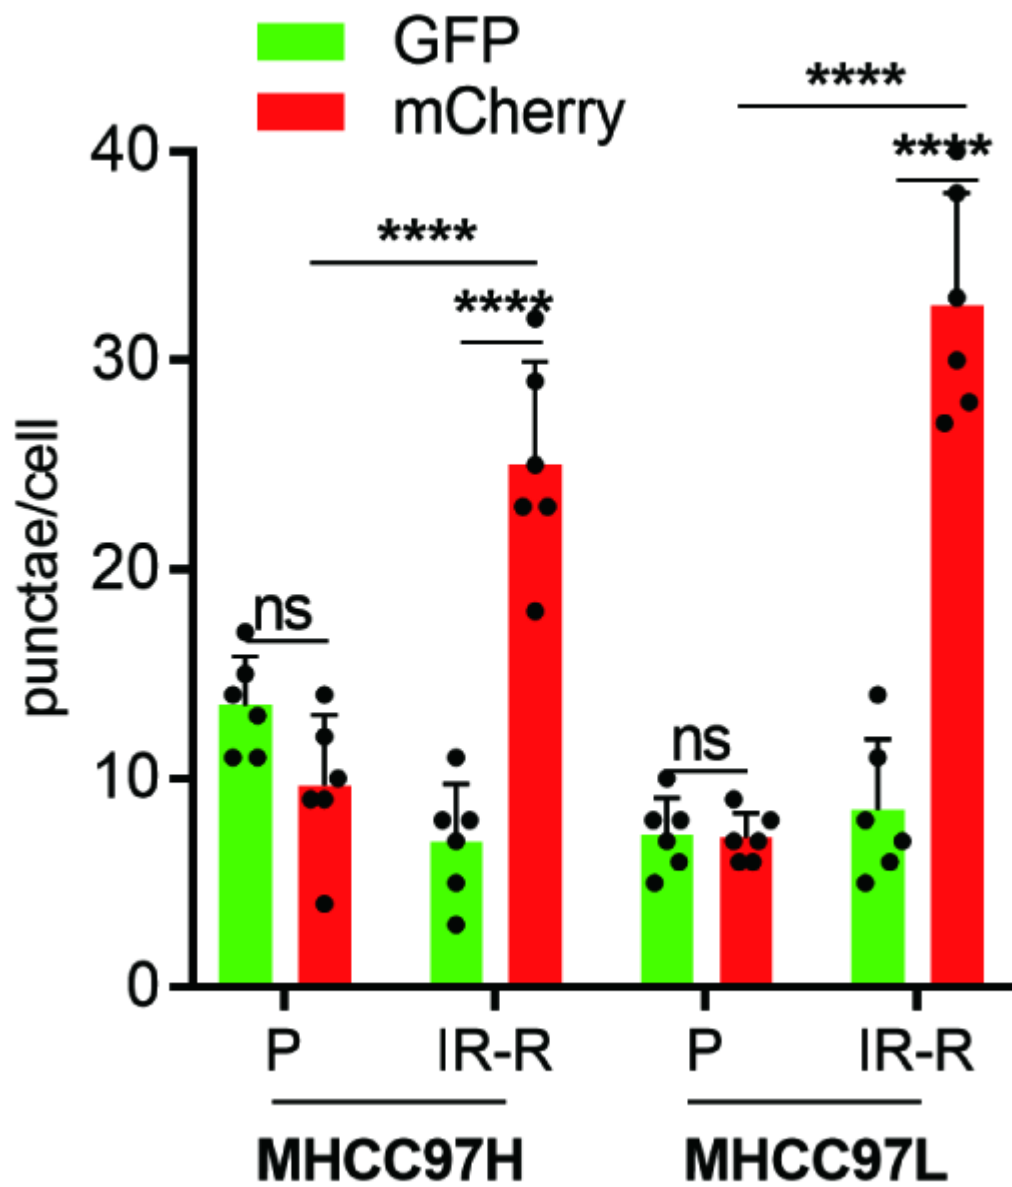

Supplement: 41419_2023_6009_MOESM18_ESM.pdf [file 41419_2023_6009_MOESM18_ESM.pdf]
