# Supplementary material for: Hexokinase 2 confers radio-resistance in hepatocellular carcinoma by promoting autophagy-dependent degradation of AIMP2
Source: PubMed Central journal article supplement (PMC10390495; doi:10.1038/s41419-023-06009-2), 2023-08-01

A

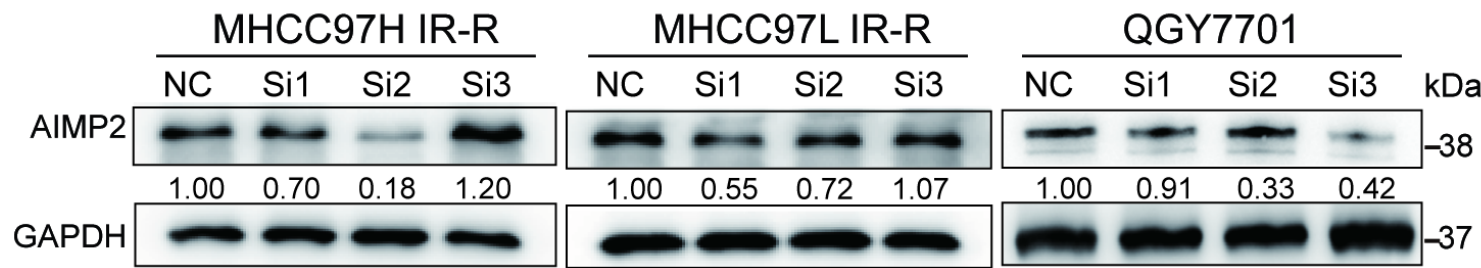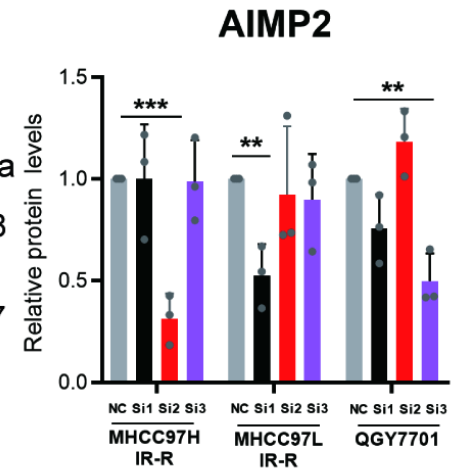

**B**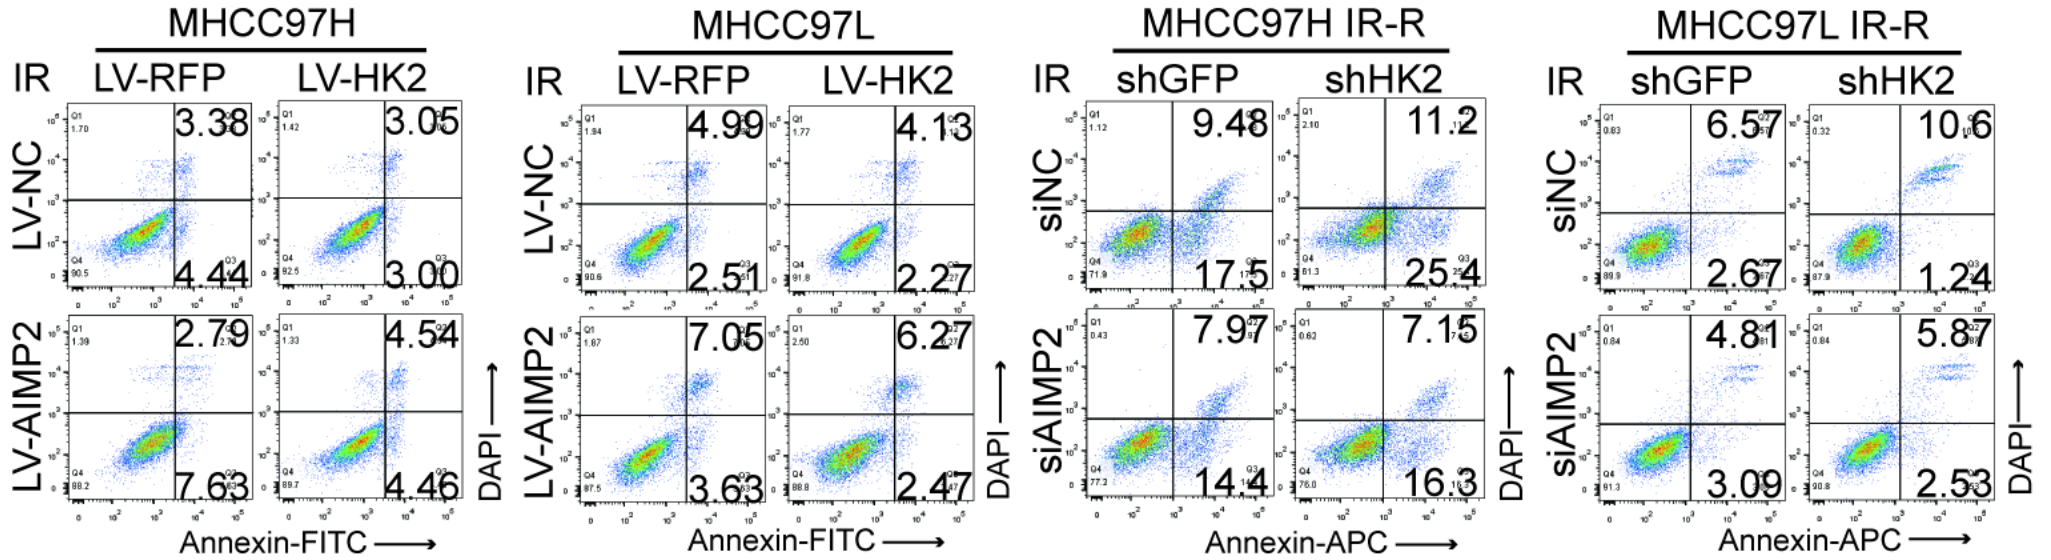

# C

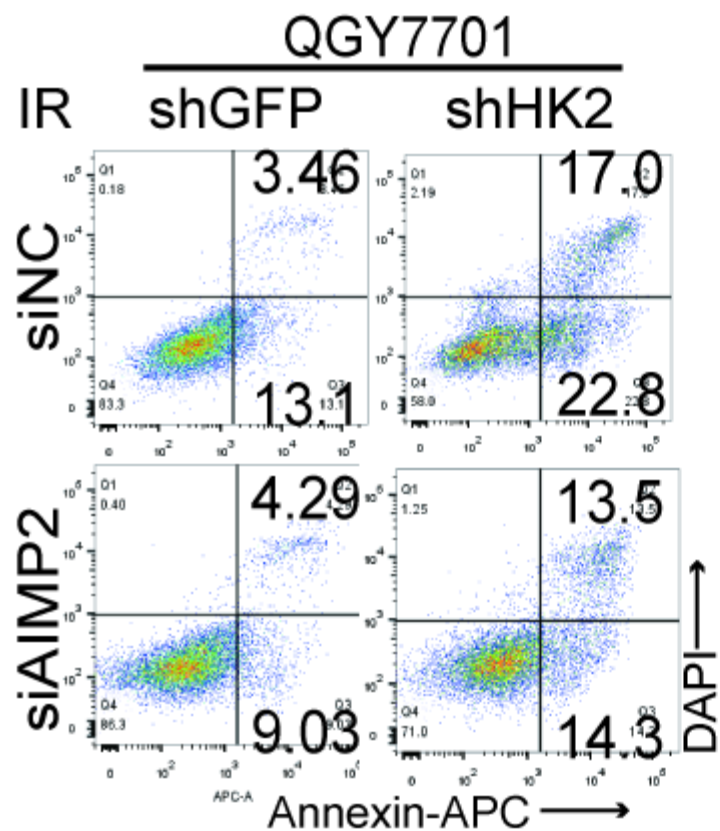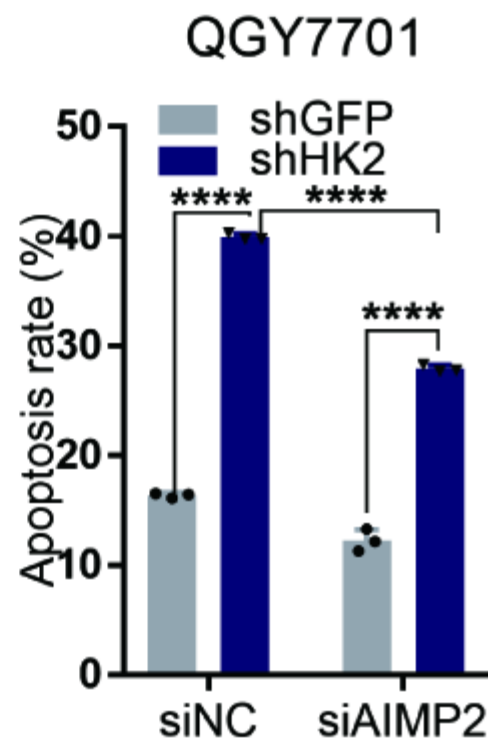

**D**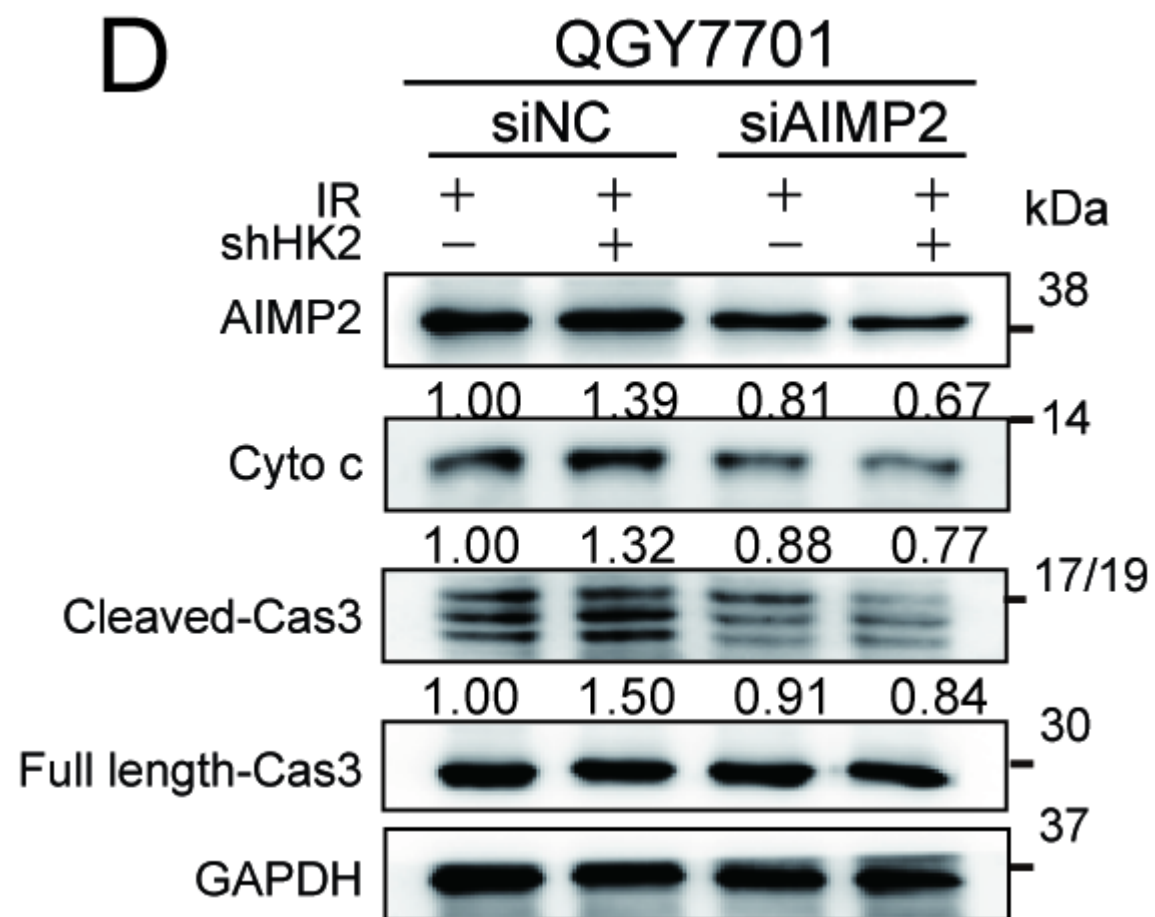

**F**

**Cyto c (IR)**

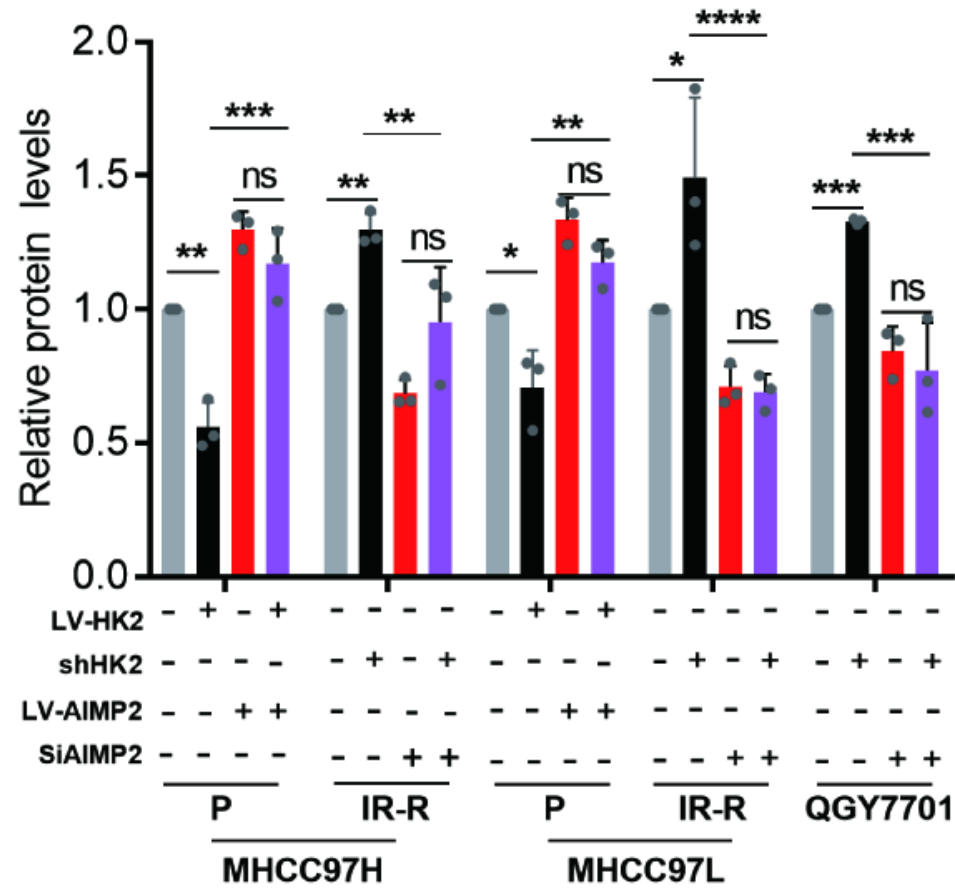

**Cleaved-Cas3 (IR)**

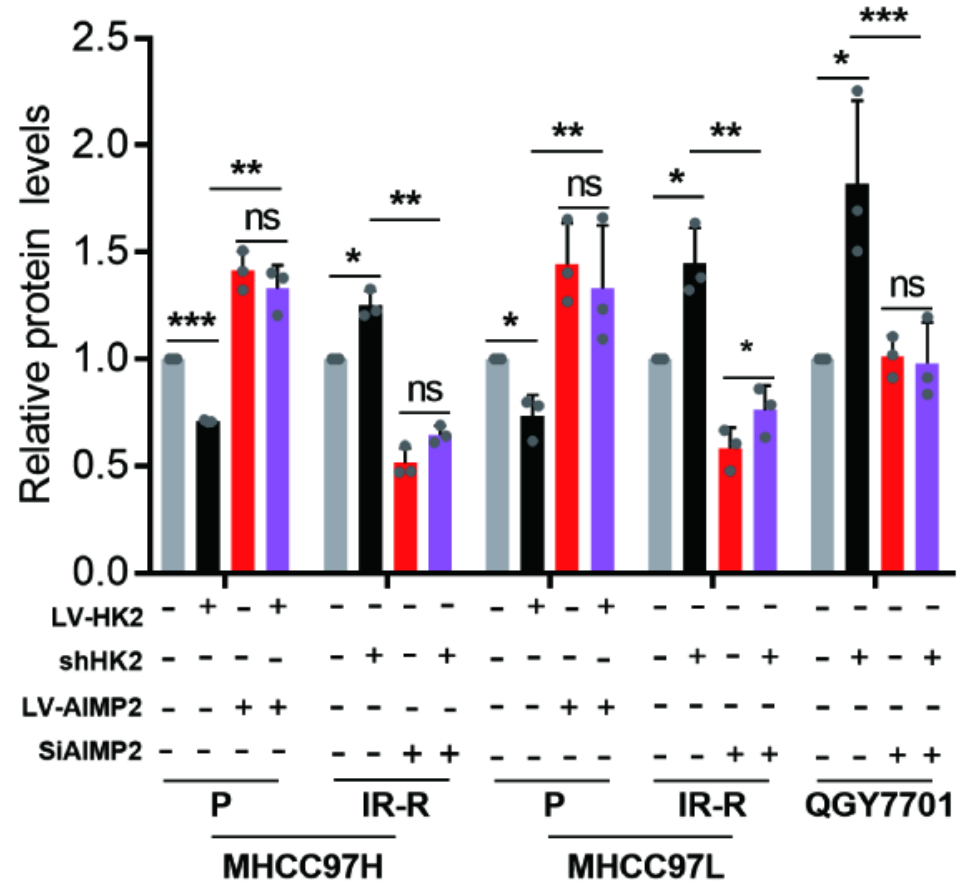

**F**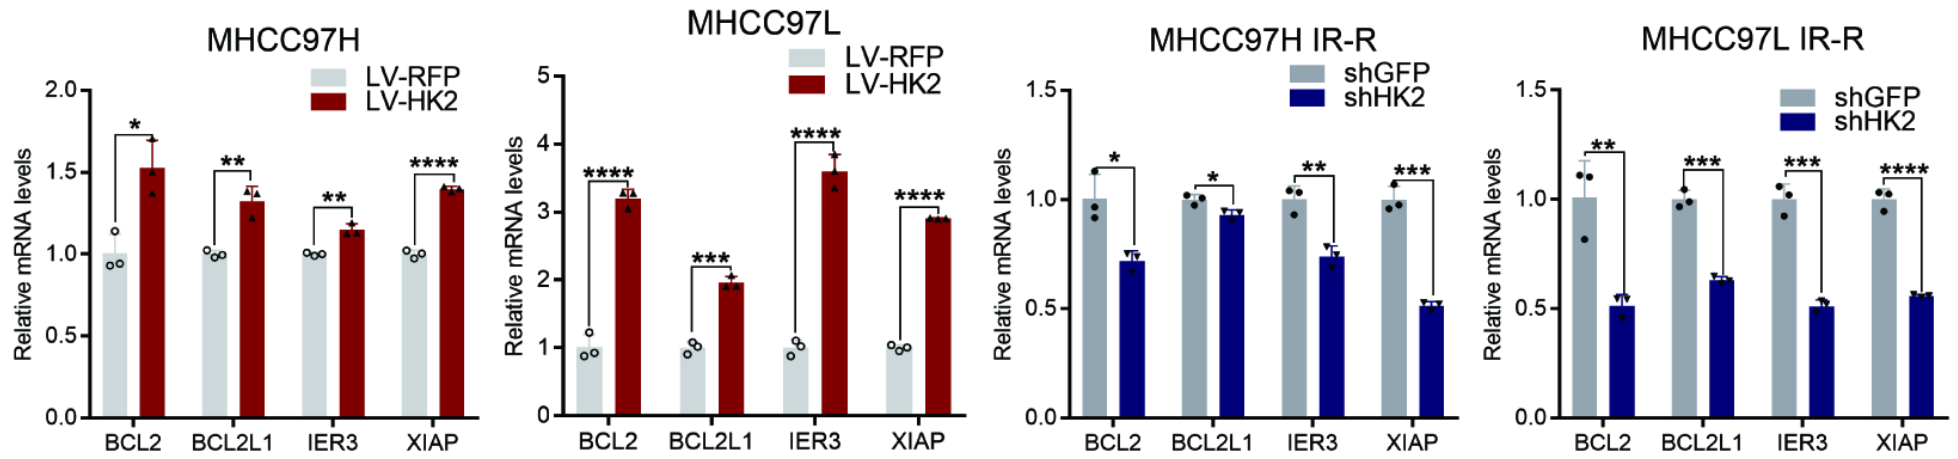

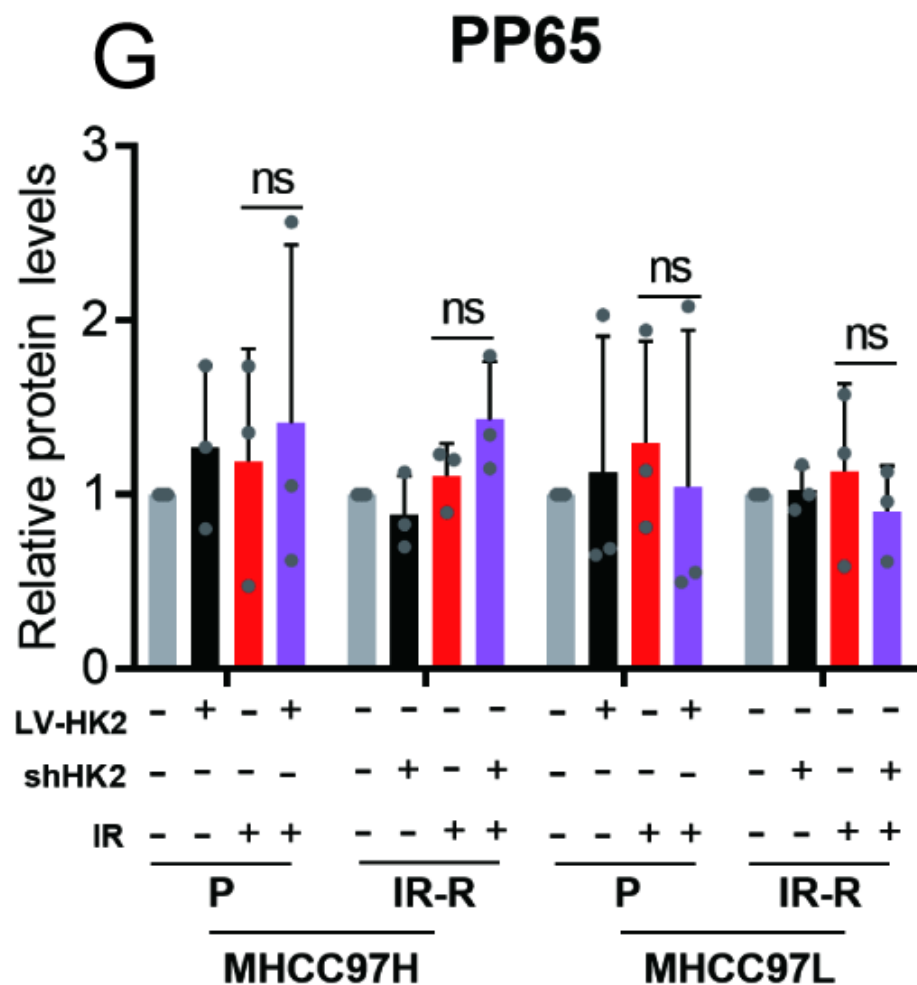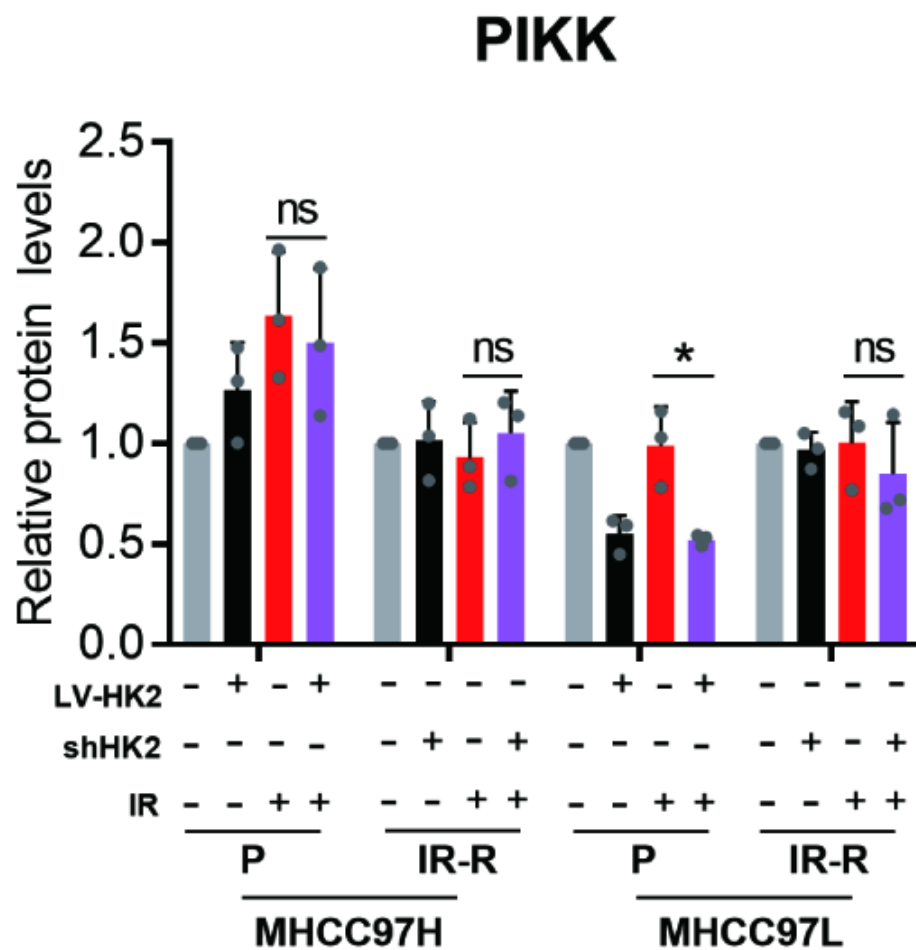

H

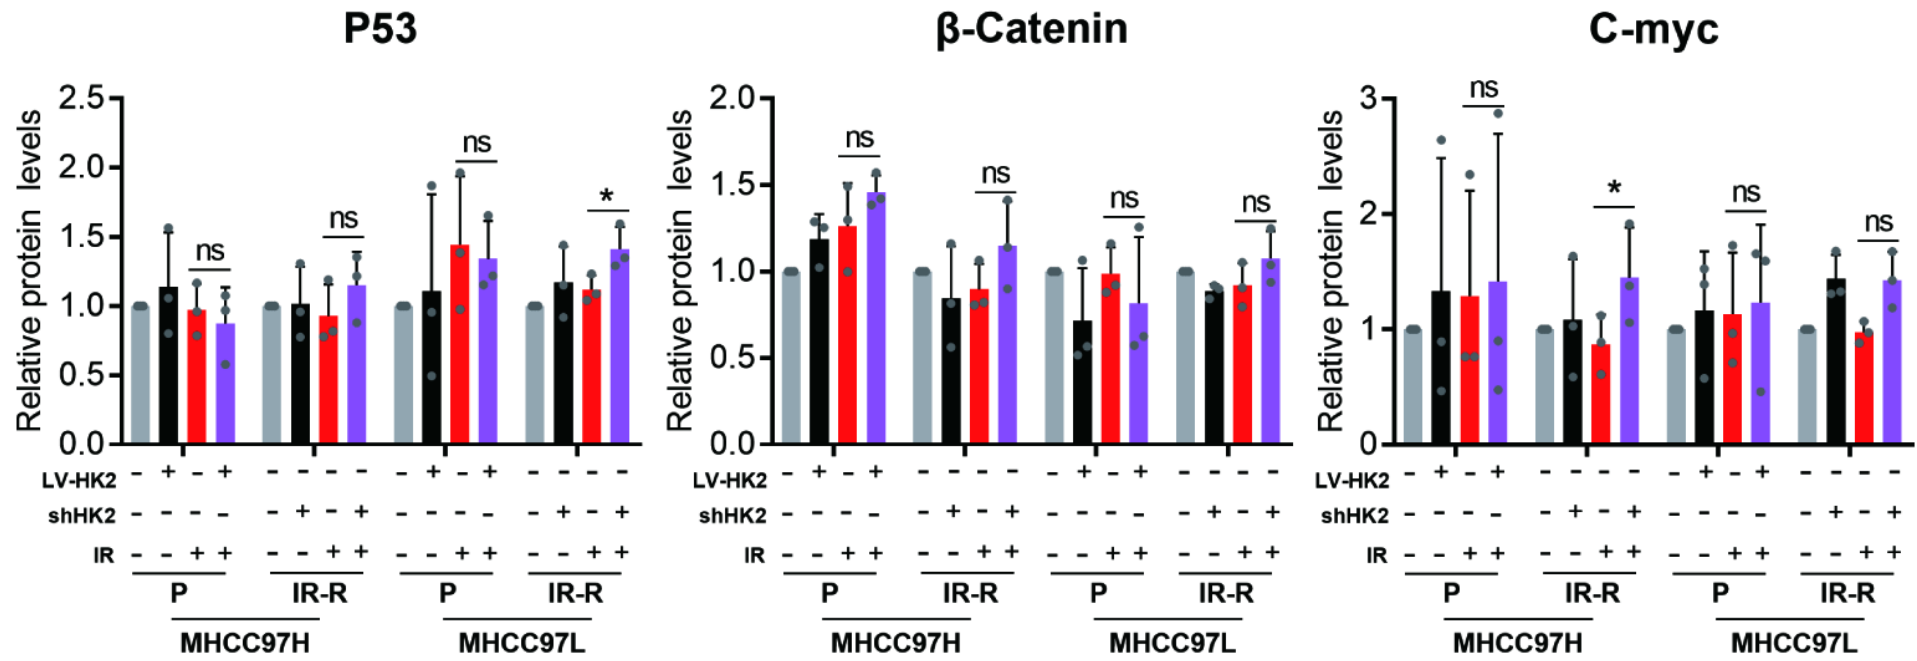



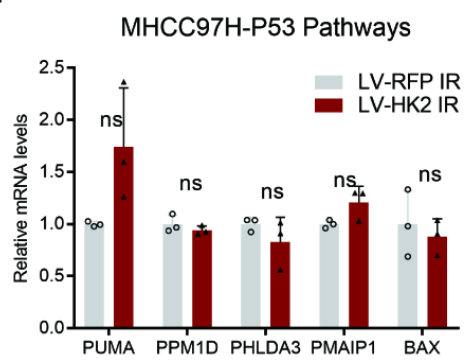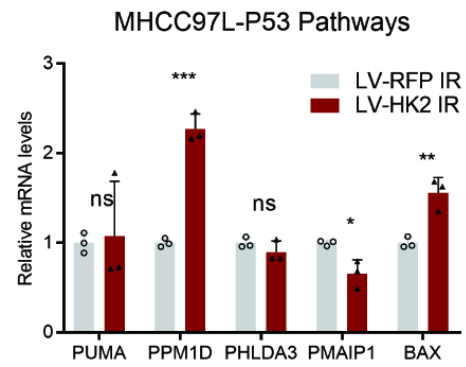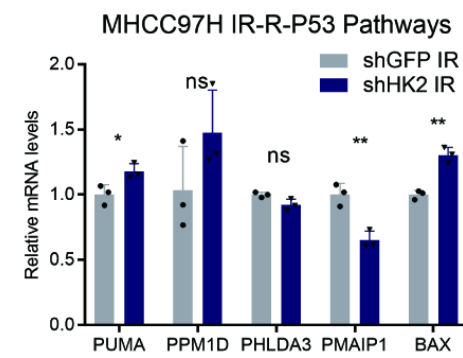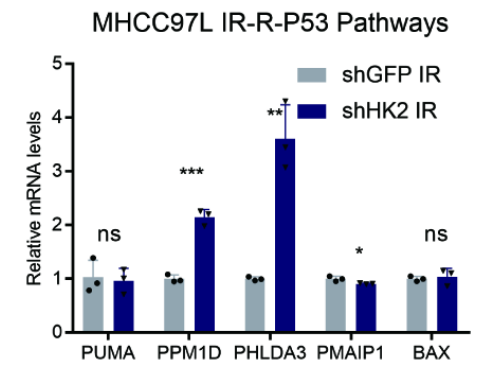

J

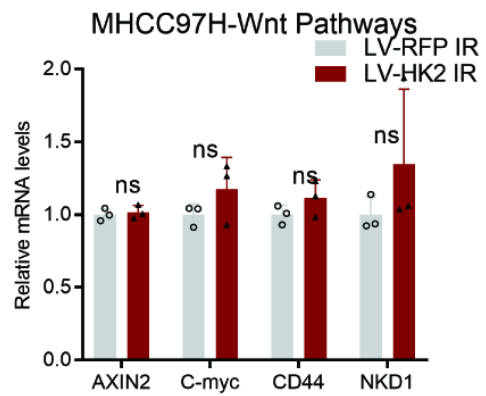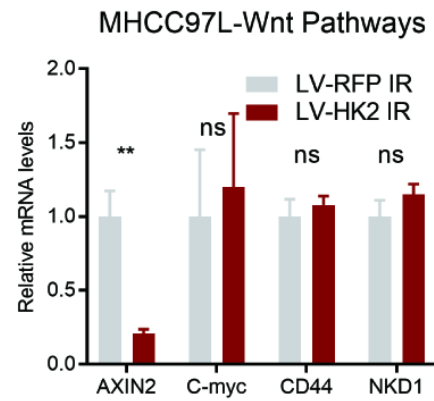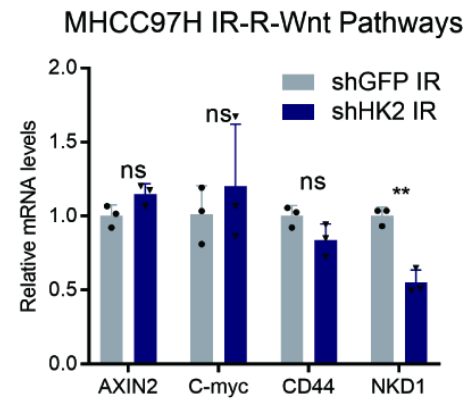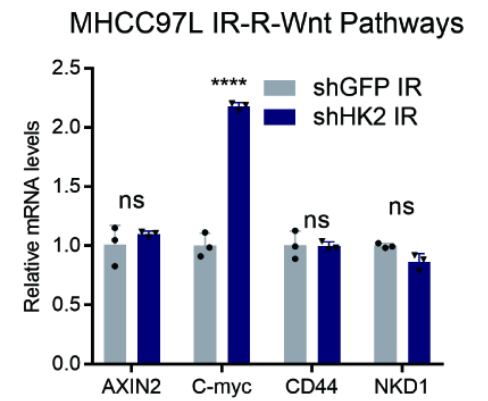

Supplement: 41419_2023_6009_MOESM19_ESM.pdf [file 41419_2023_6009_MOESM19_ESM.pdf]
