# Supplementary material for: Hexokinase 2 confers radio-resistance in hepatocellular carcinoma by promoting autophagy-dependent degradation of AIMP2
Source: PubMed Central journal article supplement (PMC10390495; doi:10.1038/s41419-023-06009-2), 2023-08-01

# A

## MHCC97H

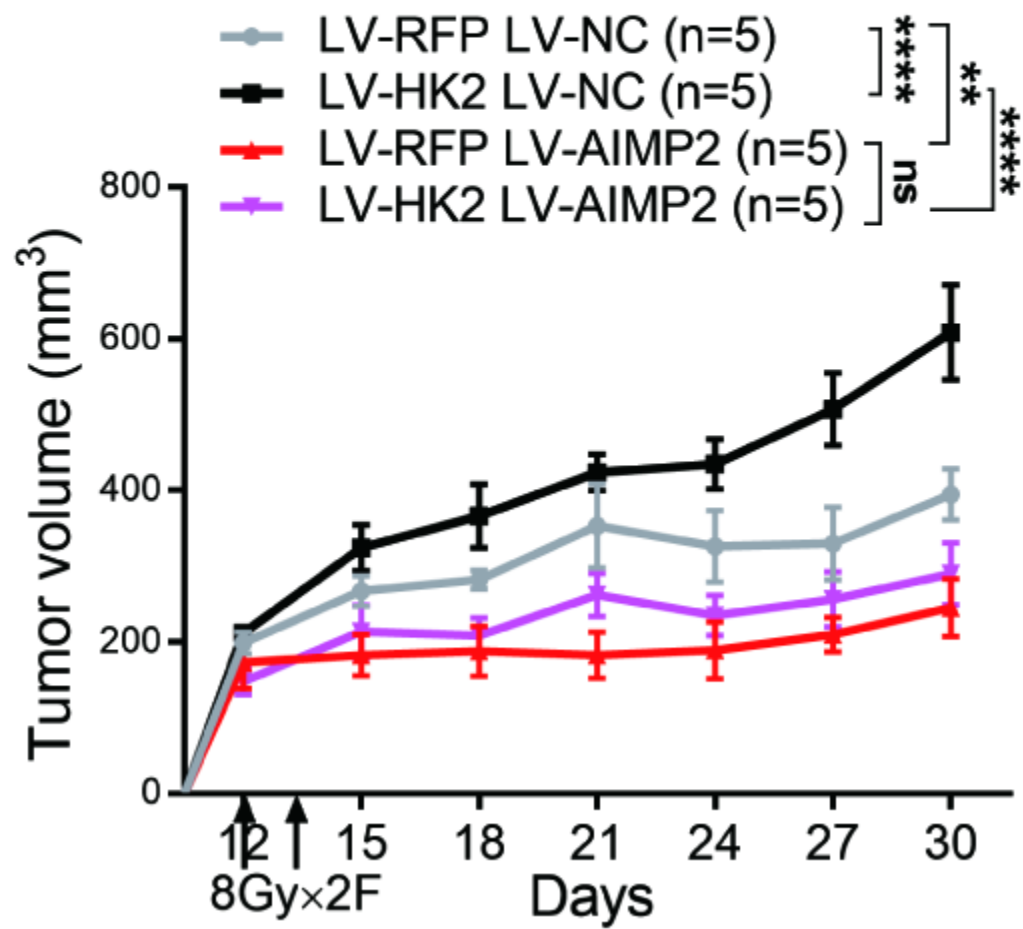

**B**

**MHCC97H**

**IR**      **LV-RFP**      **LV-HK2**      **LV-RFP**      **LV-HK2**  
**LV-NC**      **LV-NC**      **LV-AIMP2**      **LV-AIMP2**

**HK2**

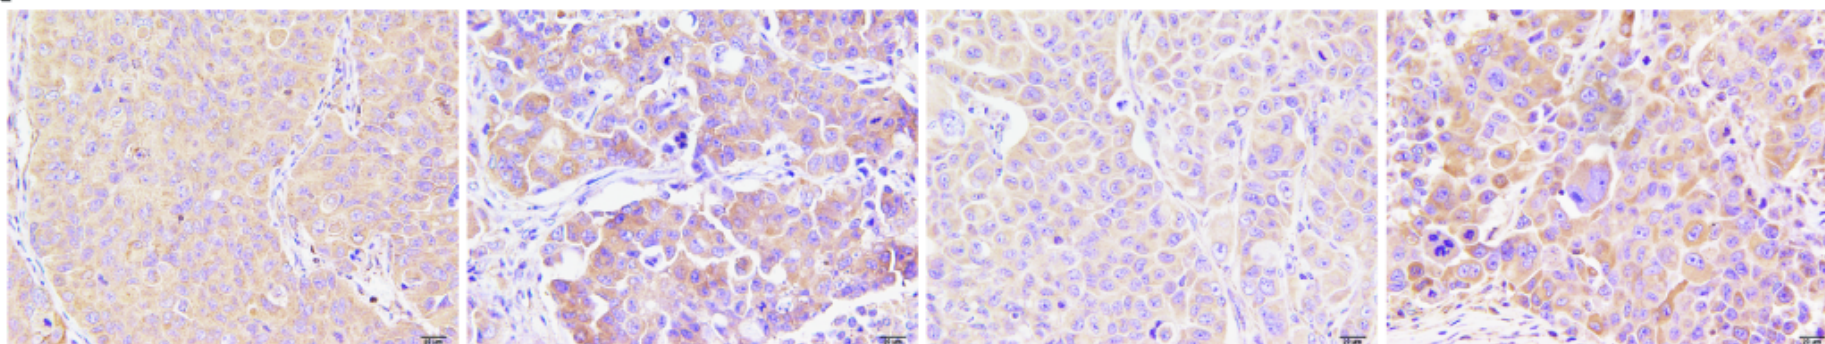

**AIMP2**

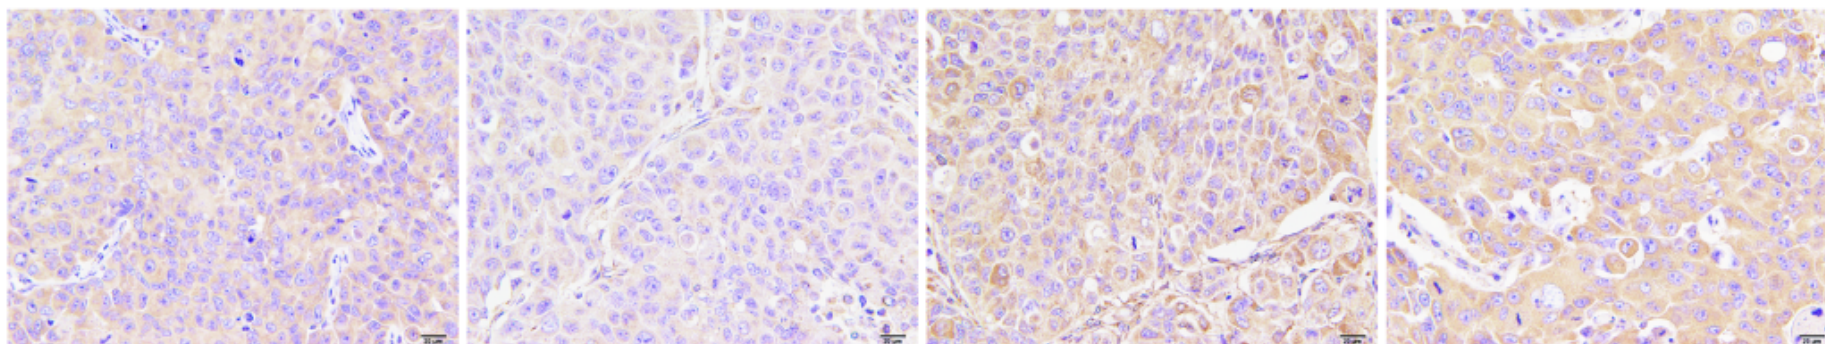

**C****MHCC97H  
(nude mice)**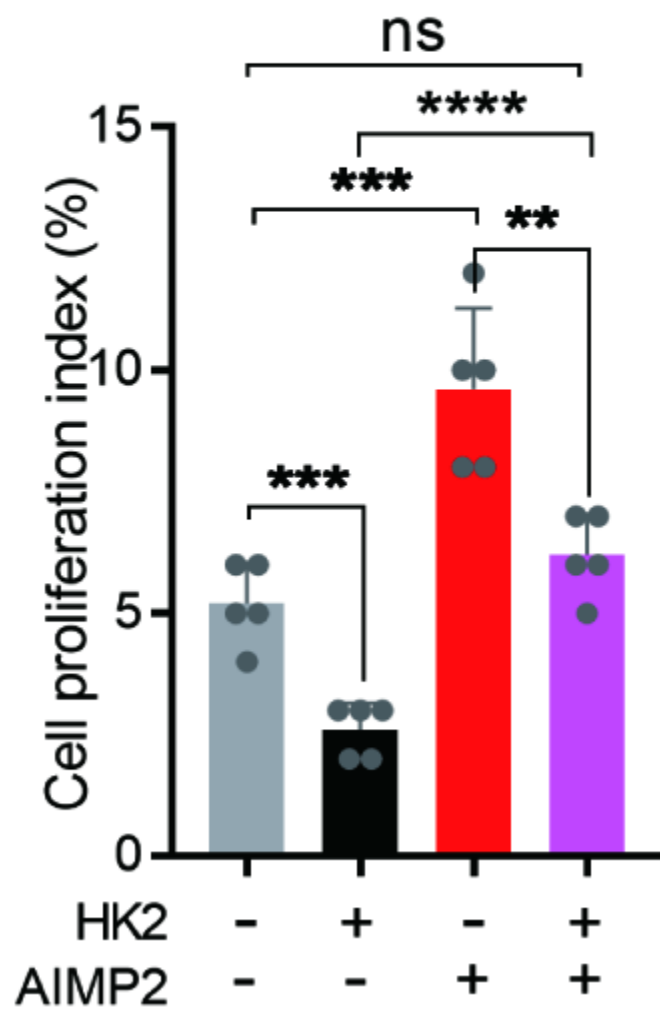**MHCC97H  
(nude mice)**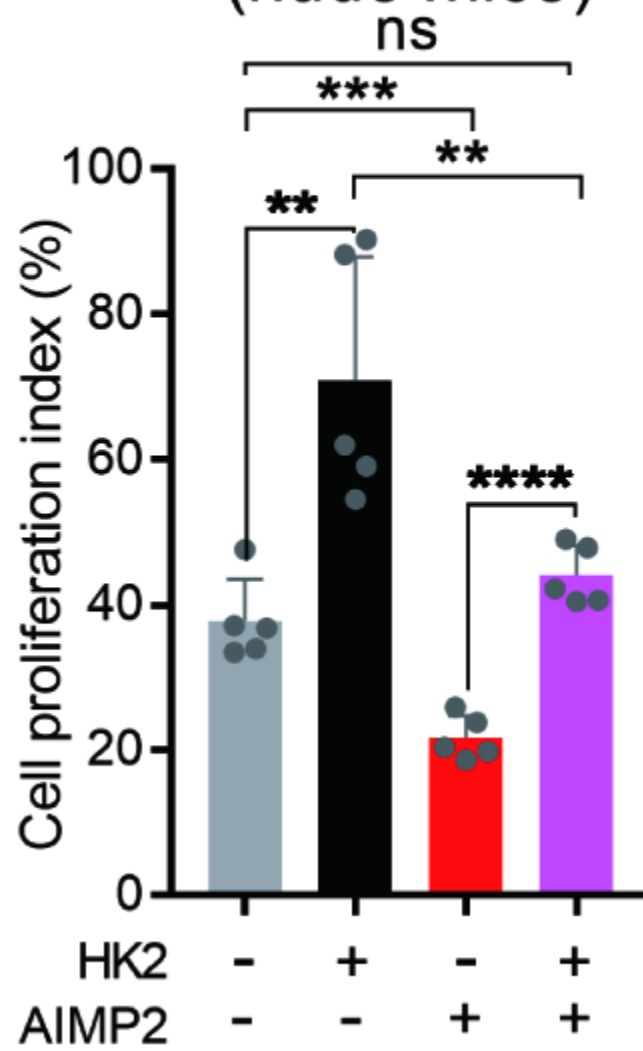

D

MHCC97H LV-HK2 (nude mice)

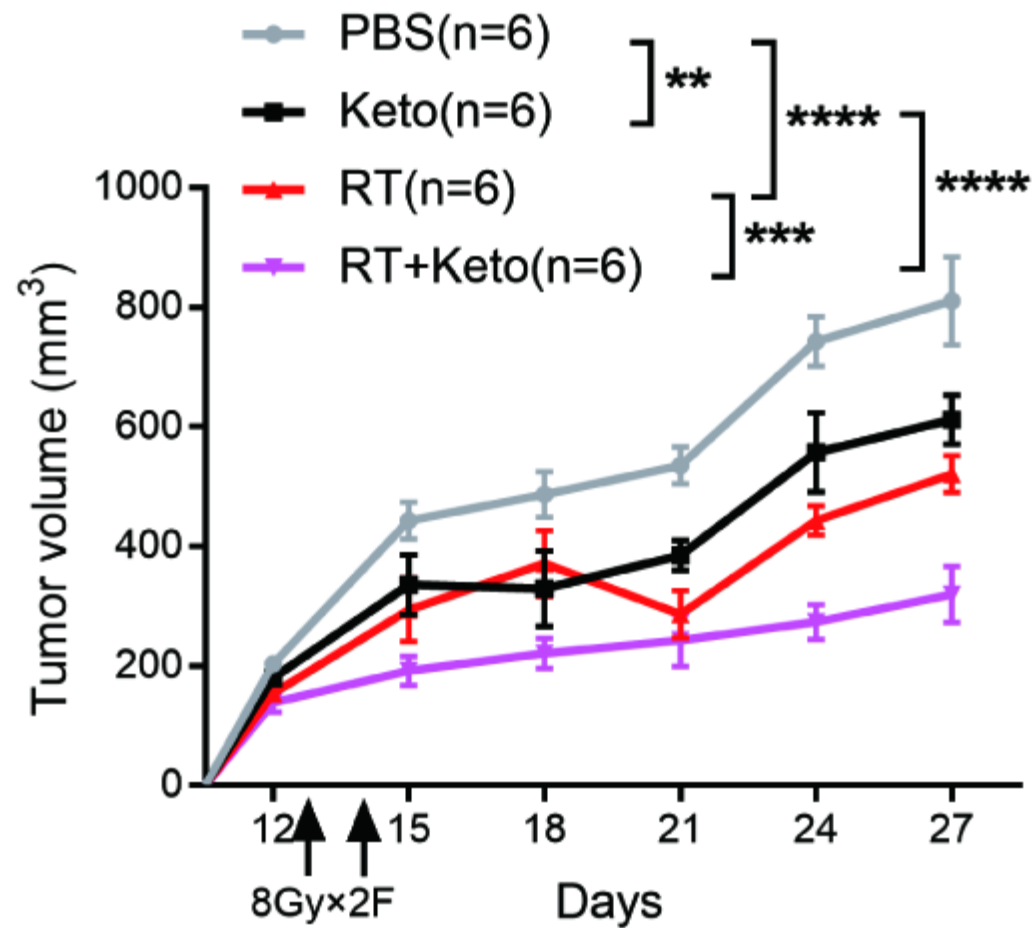

# E

## H22 LV-HK2 (nude mice)

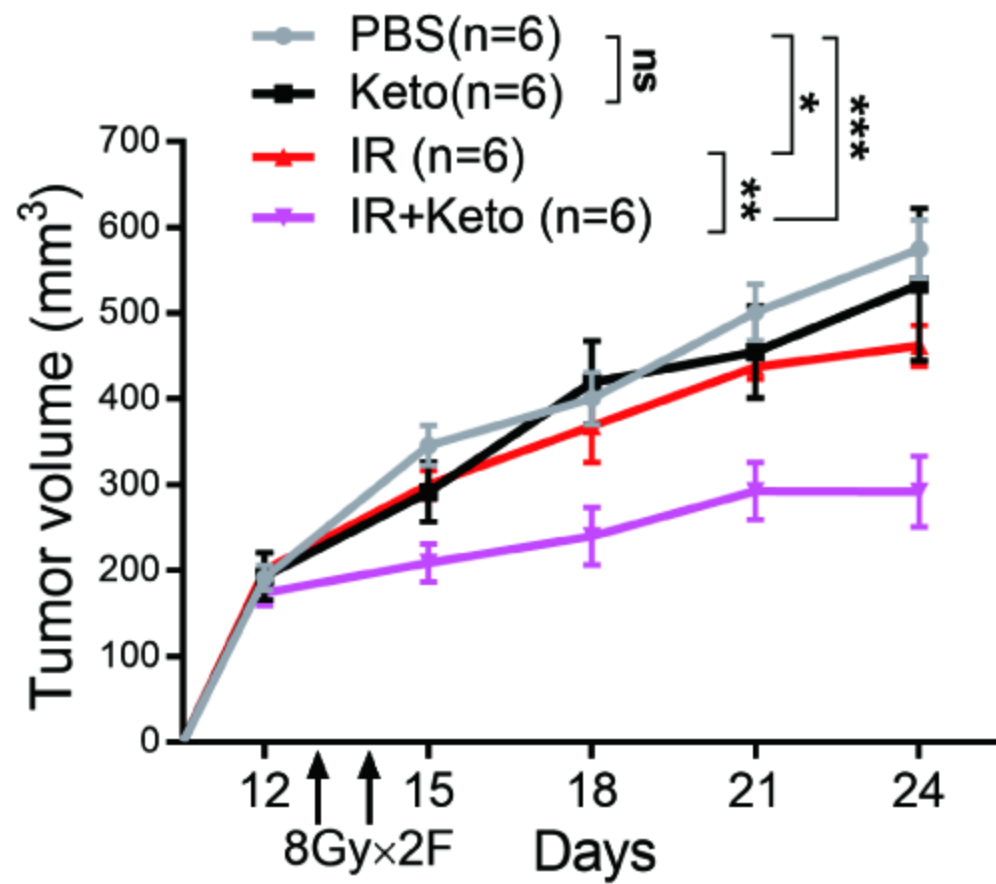

MHCC97H LV-HK2 (nude mice)

Blank

IR

PBS

Keto

PBS

Keto

↑

Ki-67

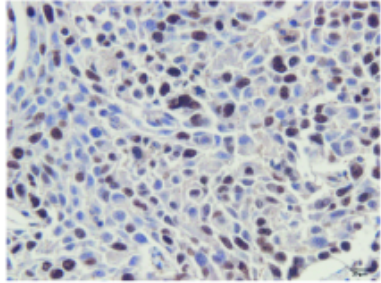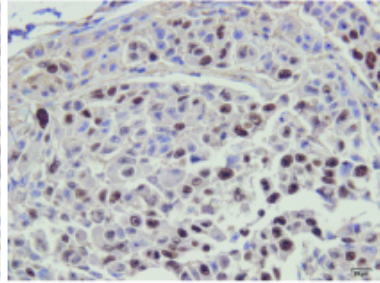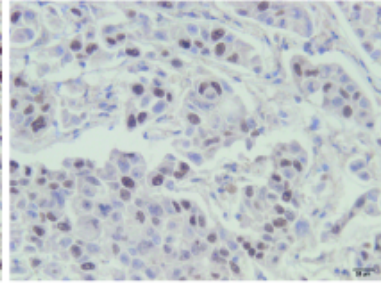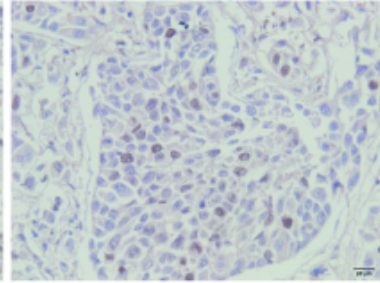

Cyto c

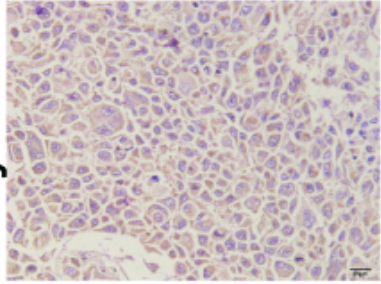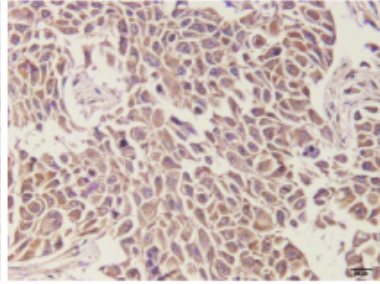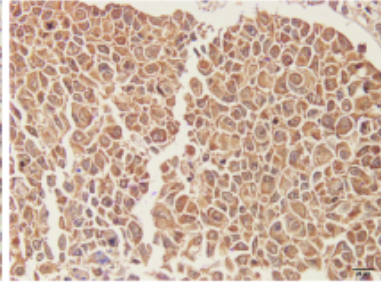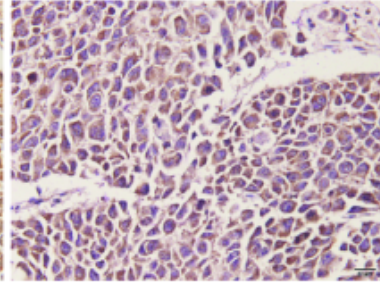

LC3 II

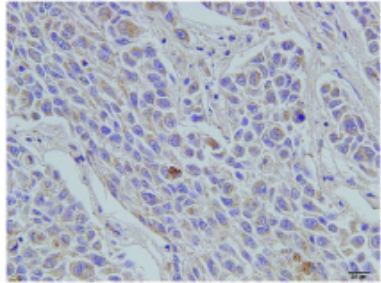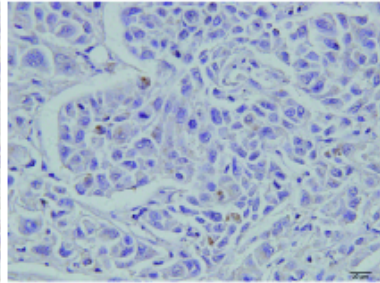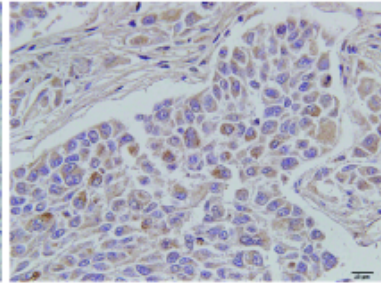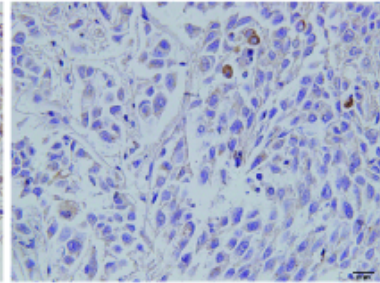

HK2

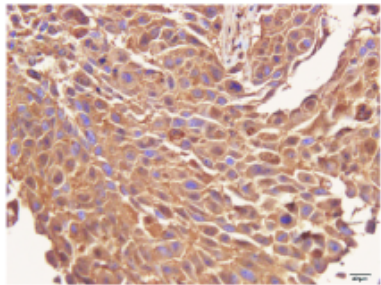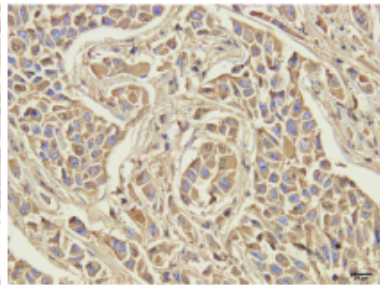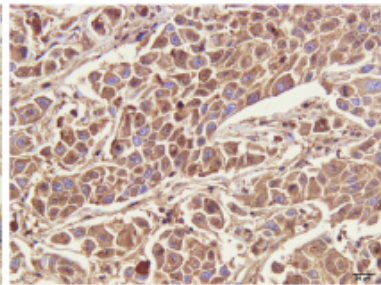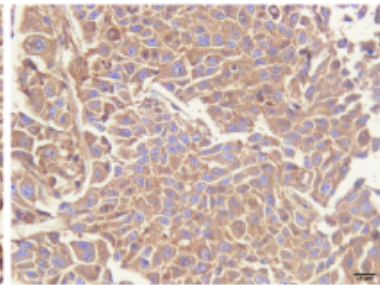

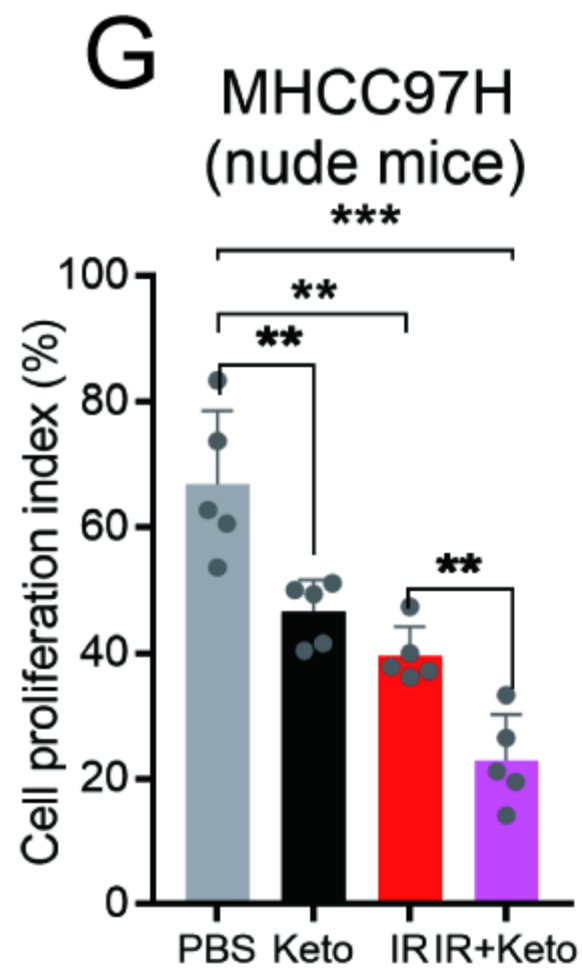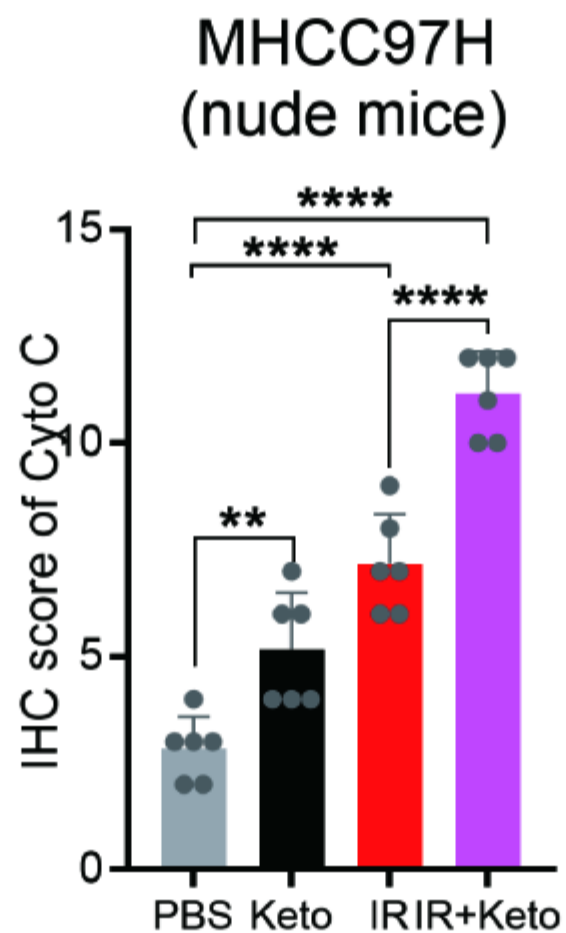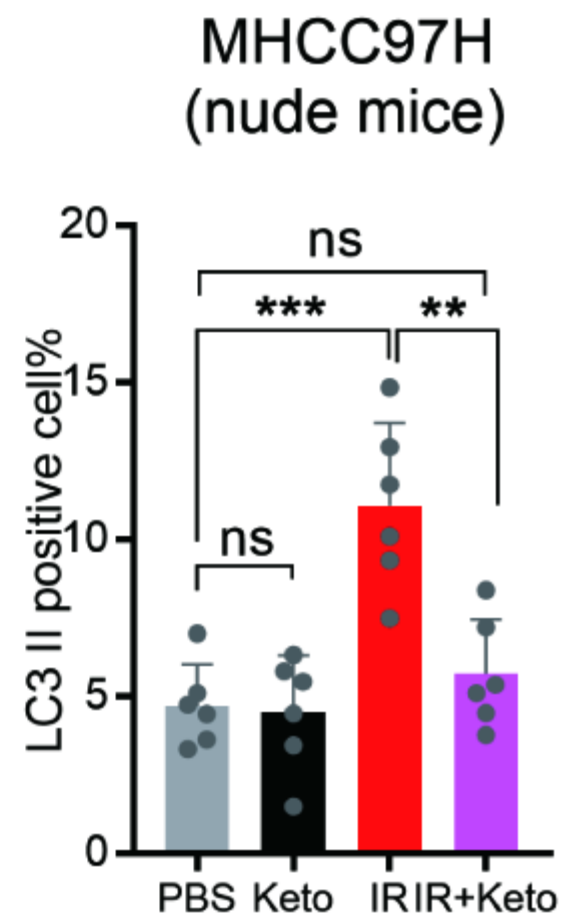

# H

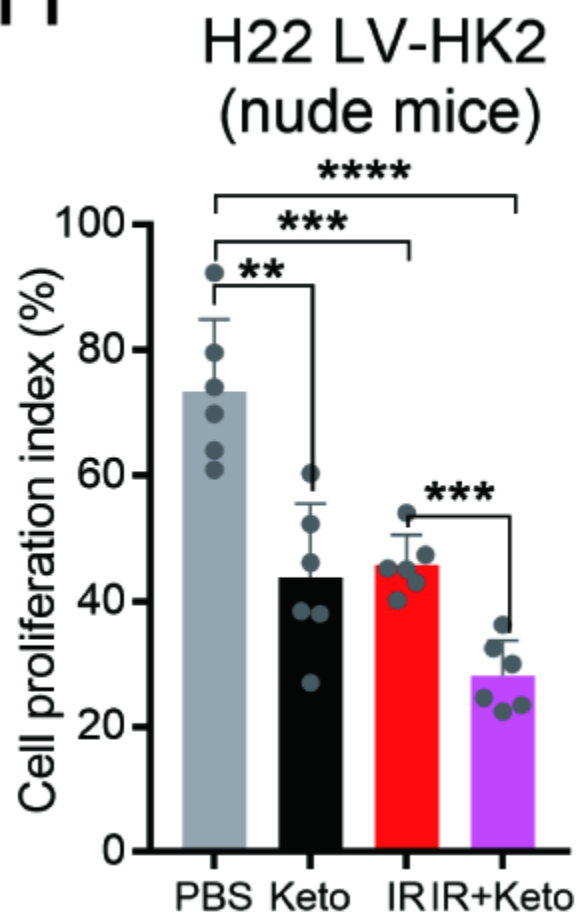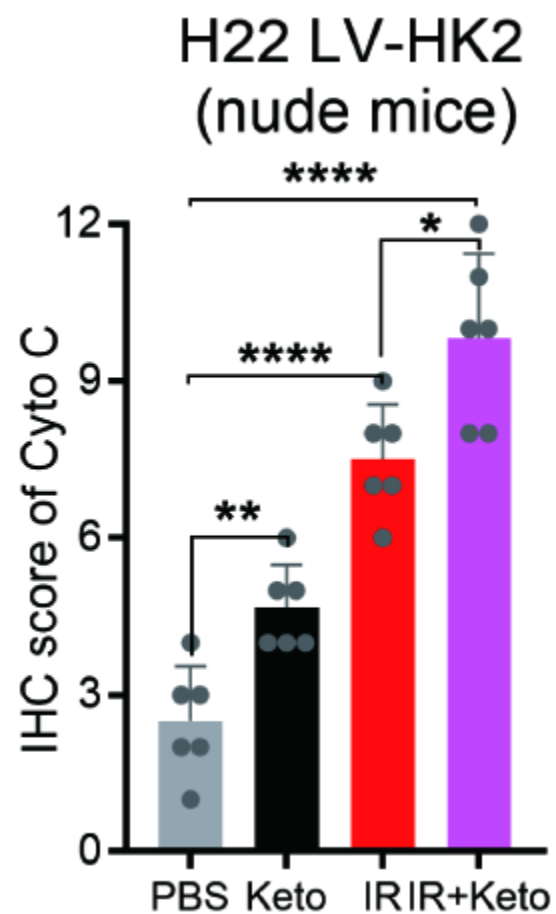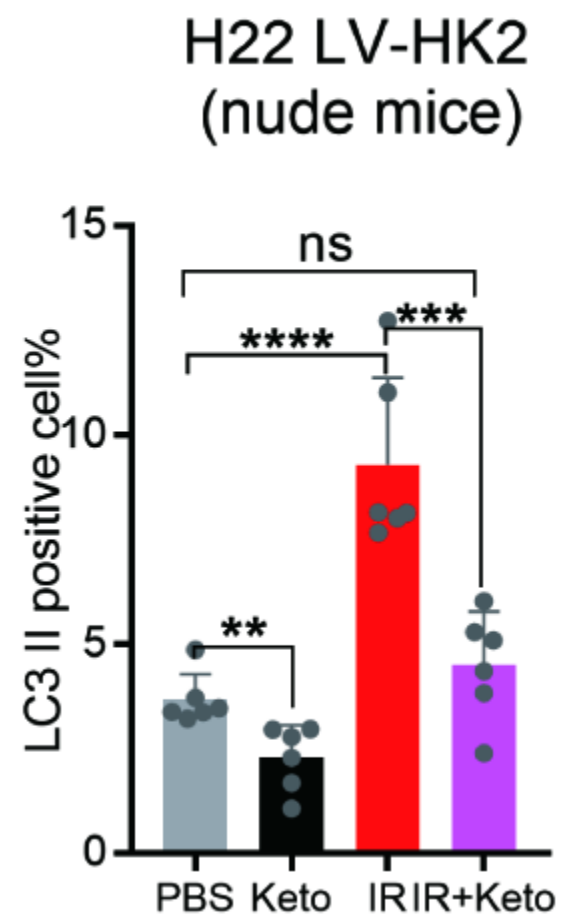



I

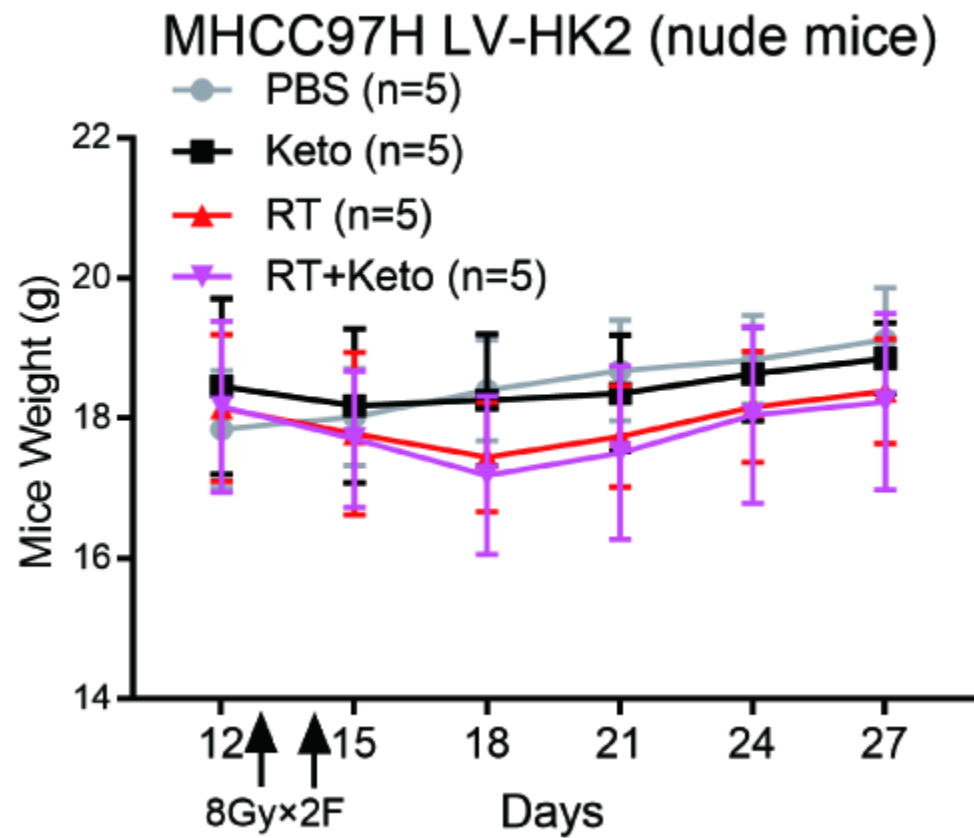

**J**

MHCC97H LV-HK2 (nude mice)

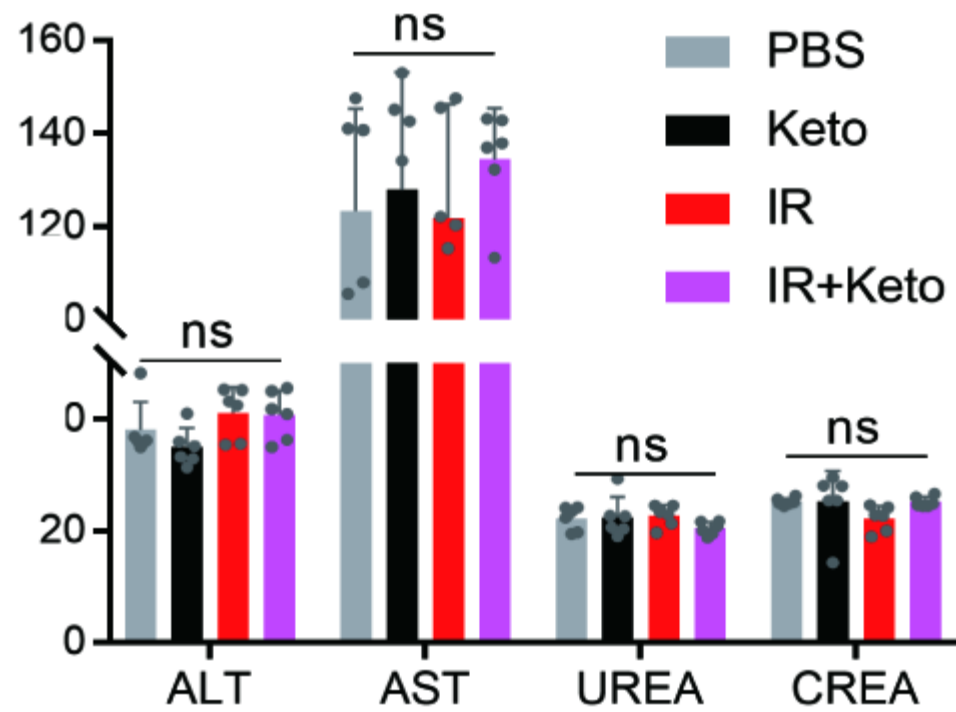

# K

## H22 LV-HK2 (C57 mice)

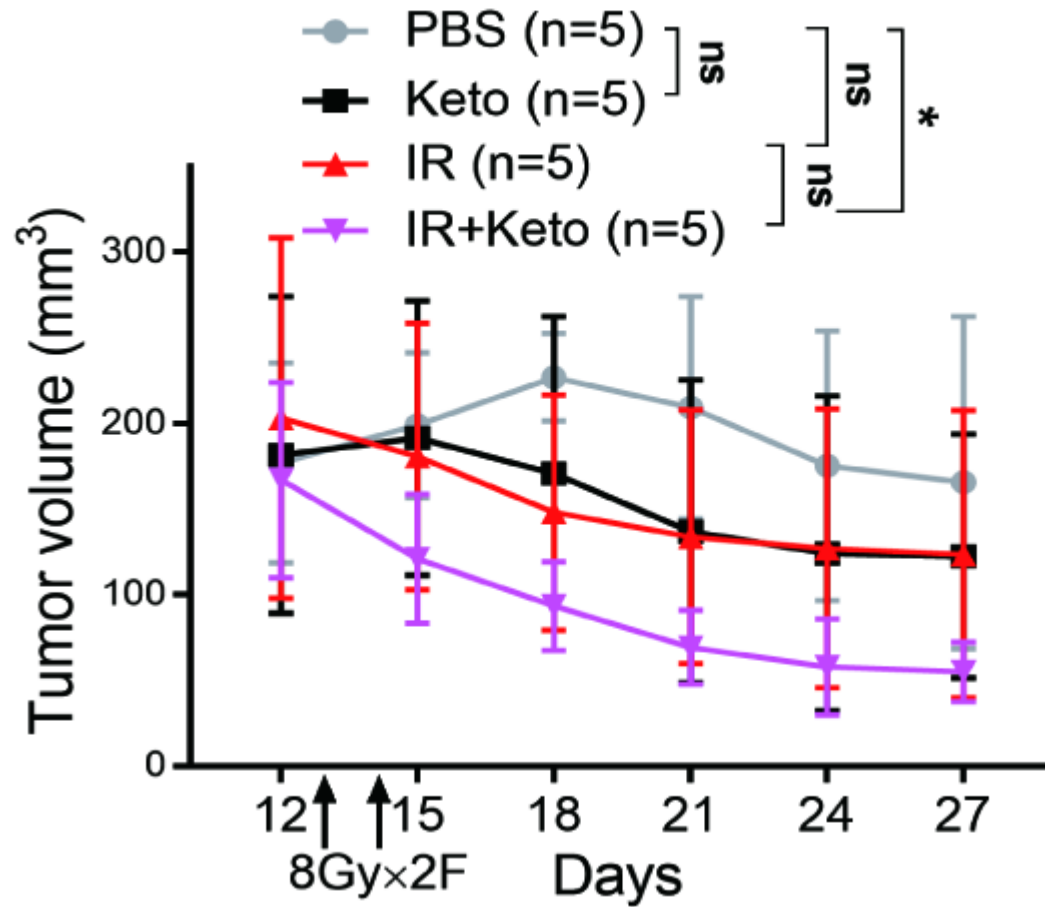

L

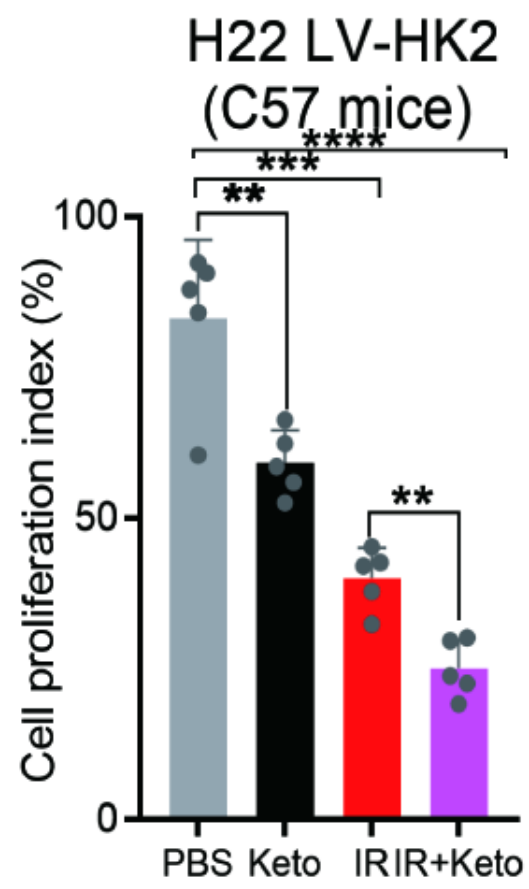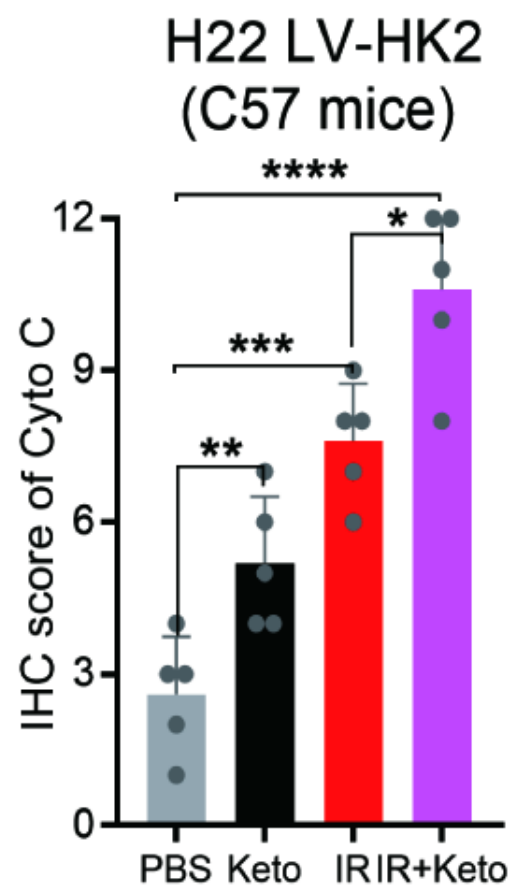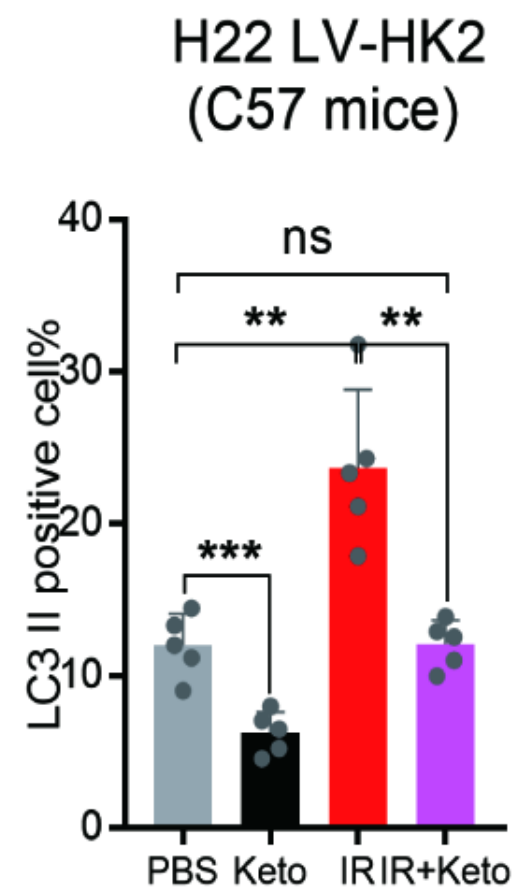

Supplement: 41419_2023_6009_MOESM20_ESM.pdf [file 41419_2023_6009_MOESM20_ESM.pdf]
