# Supplementary material for: Hexokinase 2 confers radio-resistance in hepatocellular carcinoma by promoting autophagy-dependent degradation of AIMP2
Source: PubMed Central journal article supplement (PMC10390495; doi:10.1038/s41419-023-06009-2), 2023-08-01

FIG1

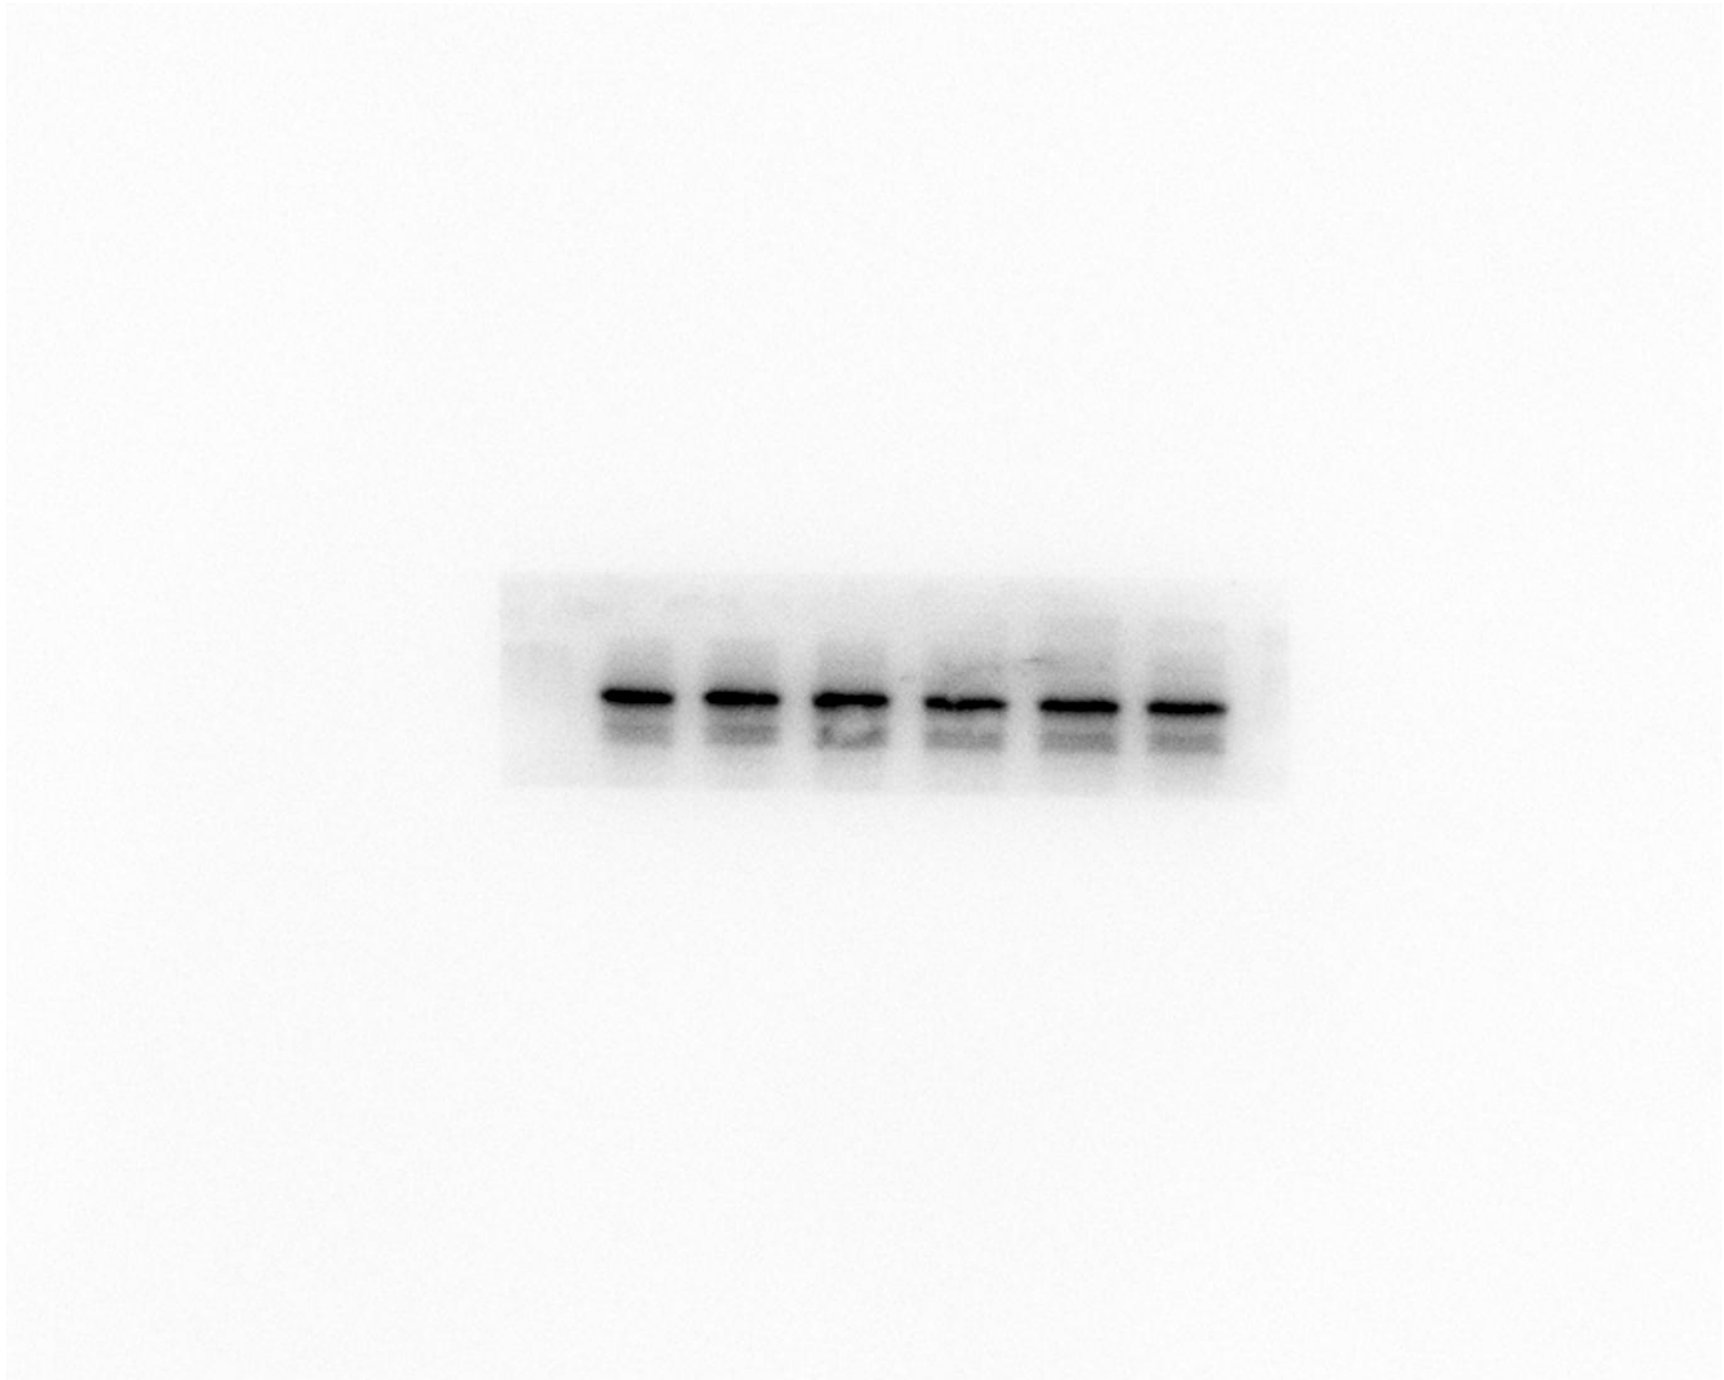

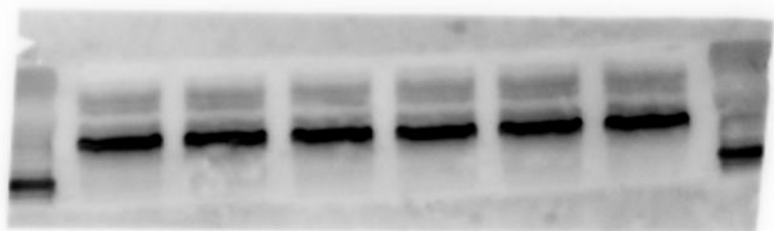

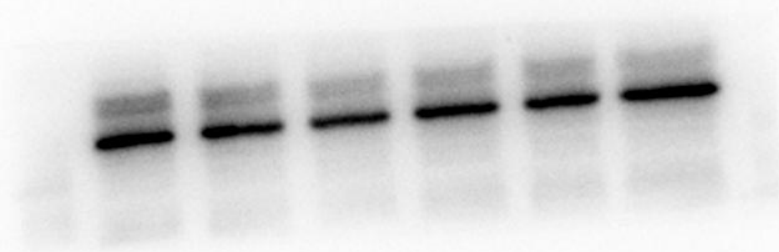

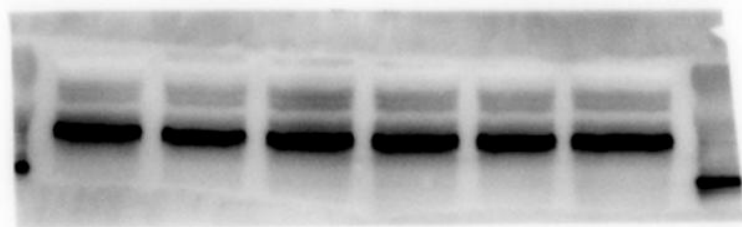

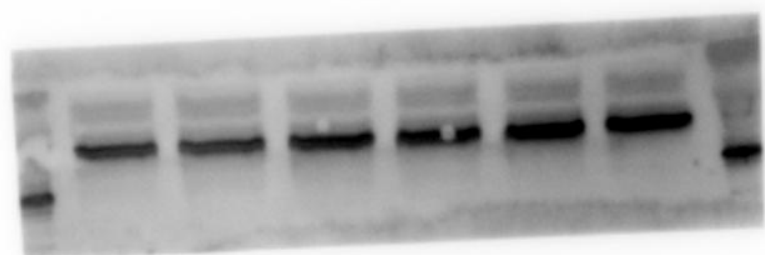

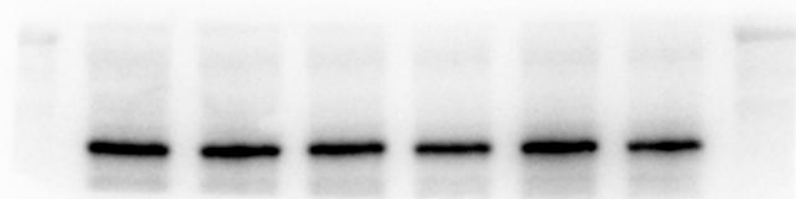

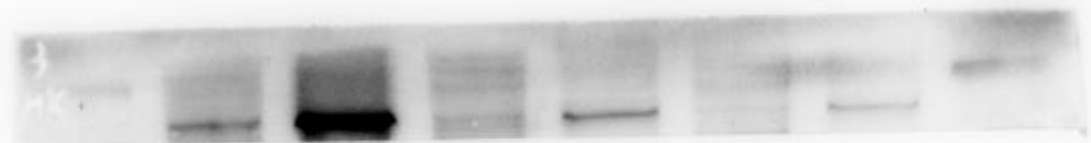

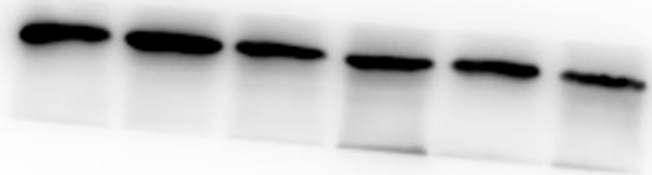



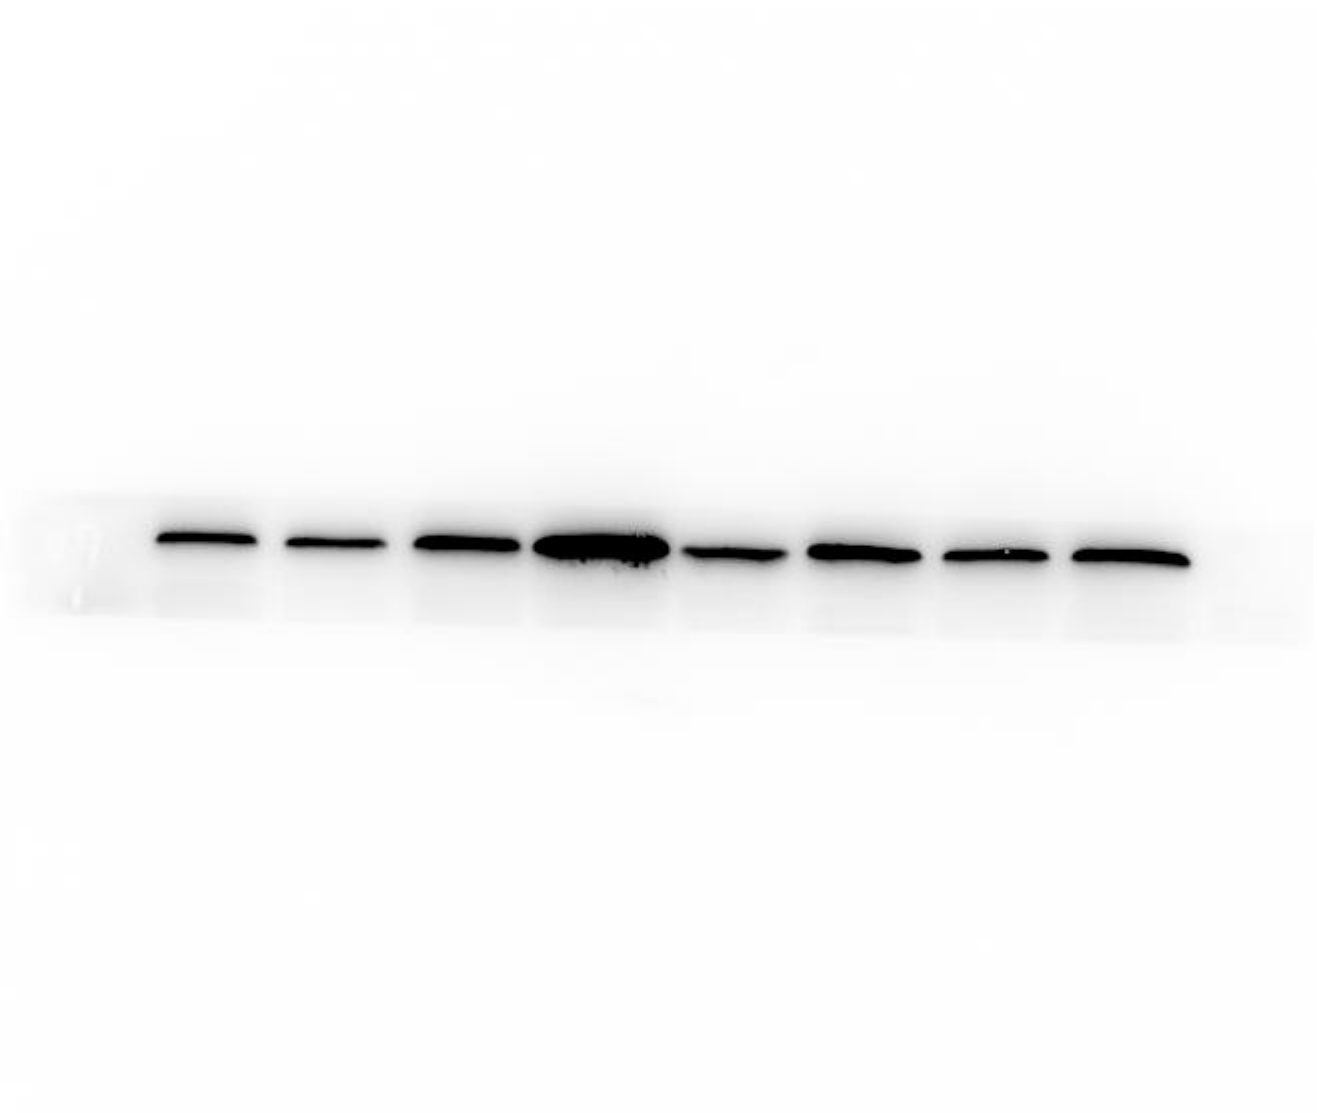

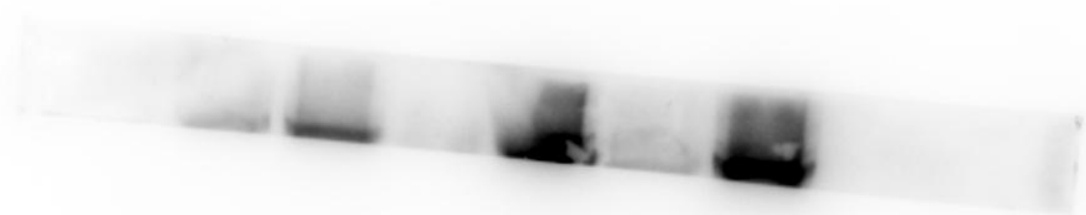

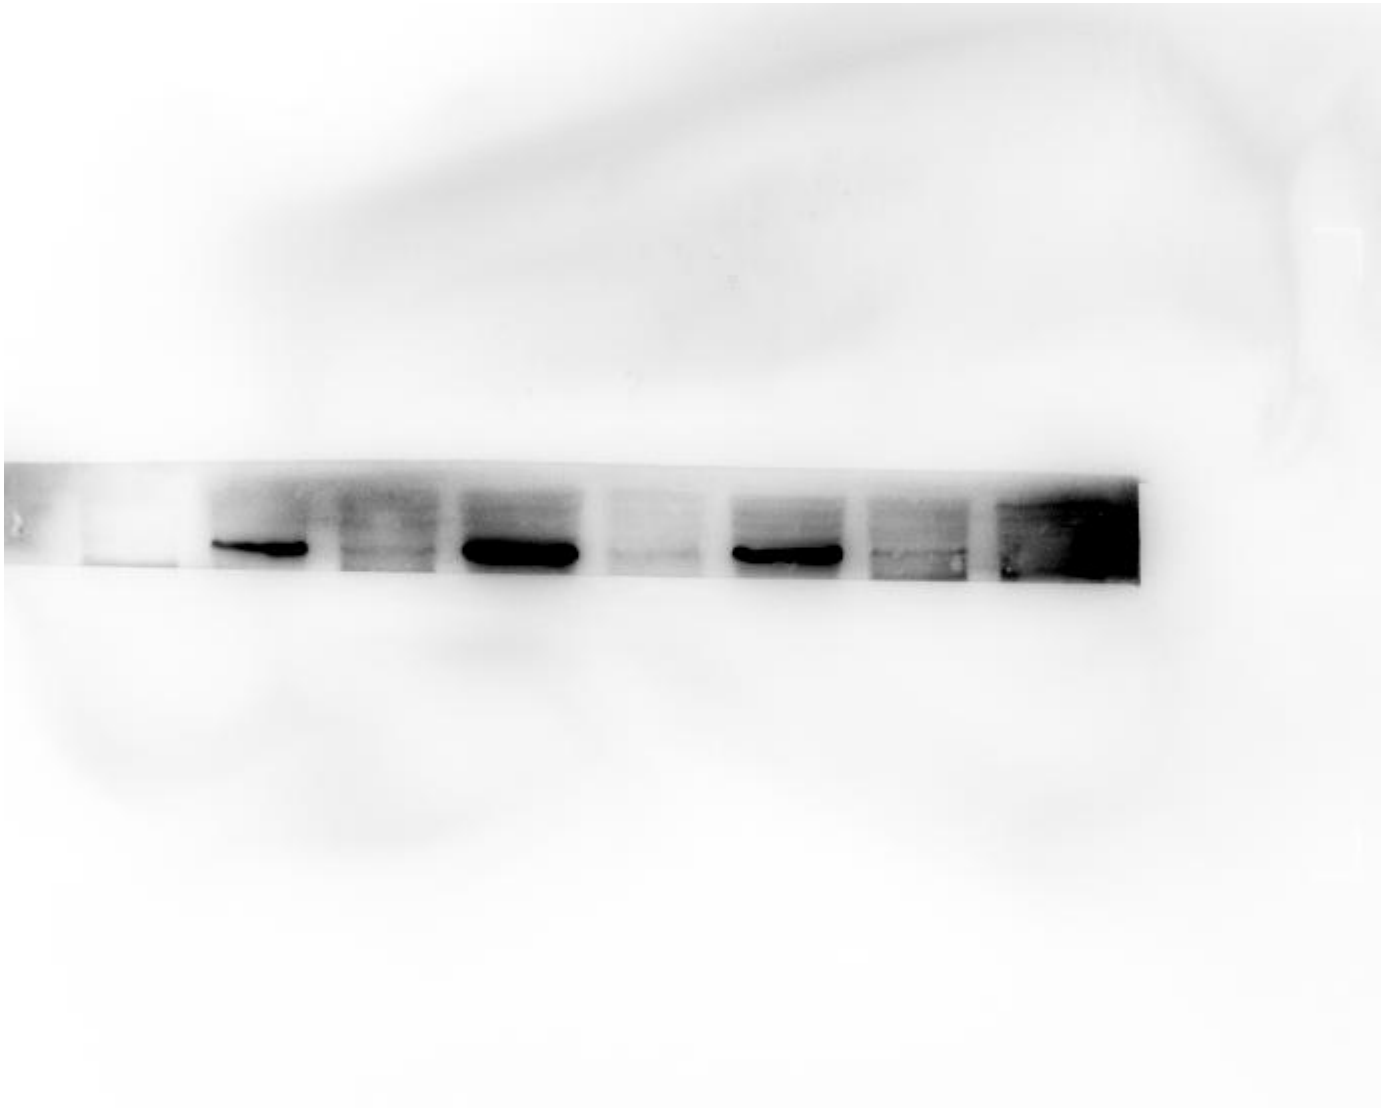

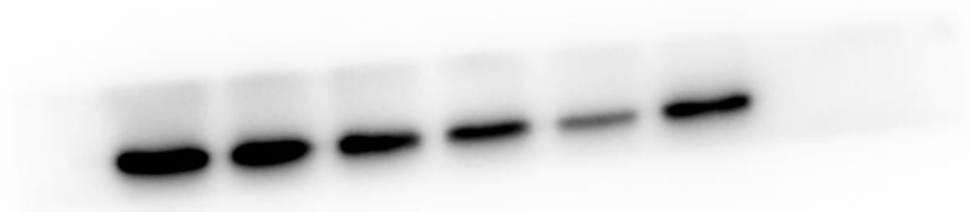

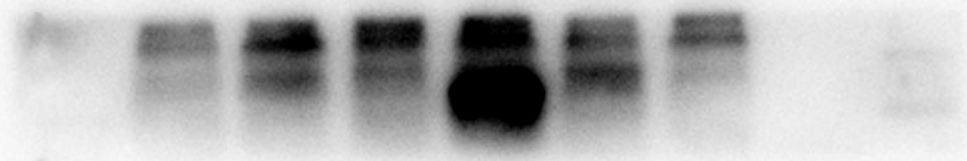

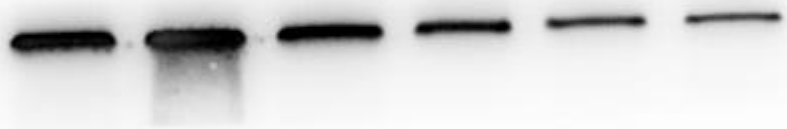

FIG2

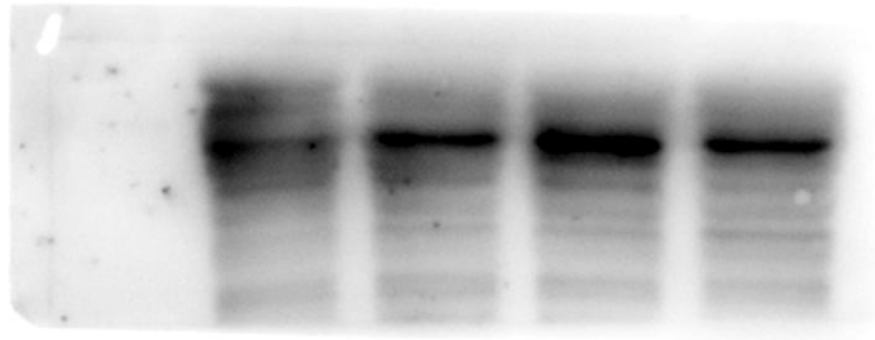

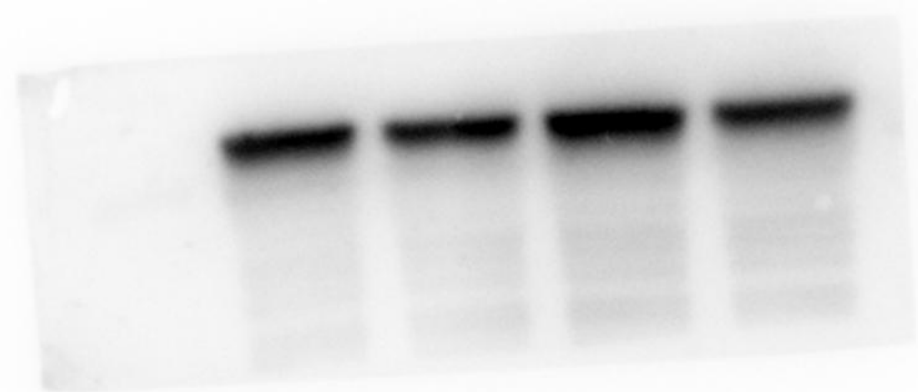



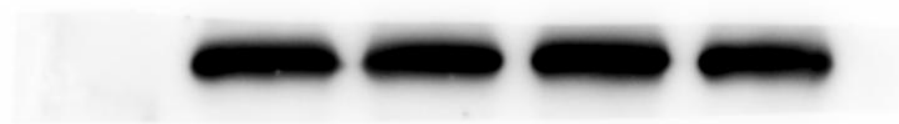

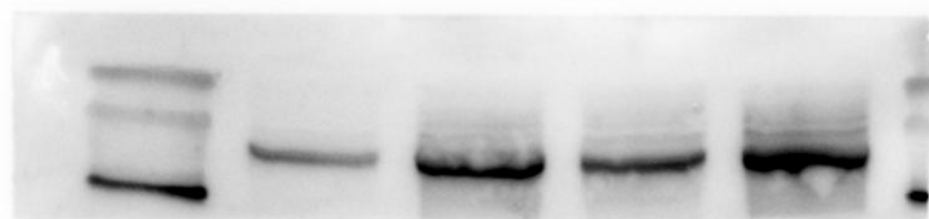

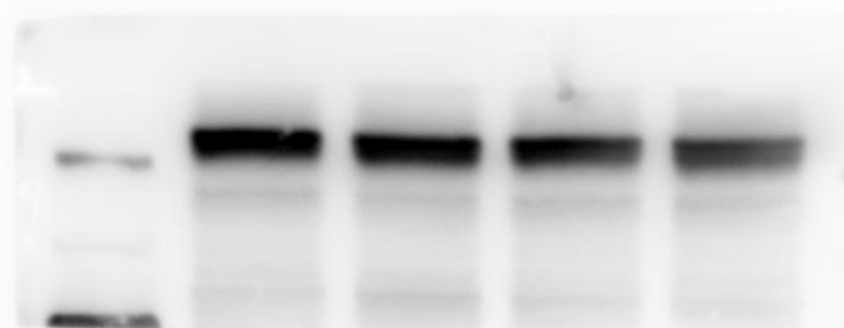

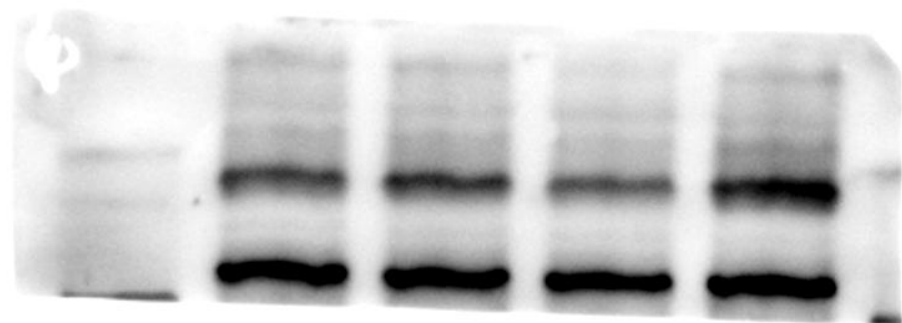



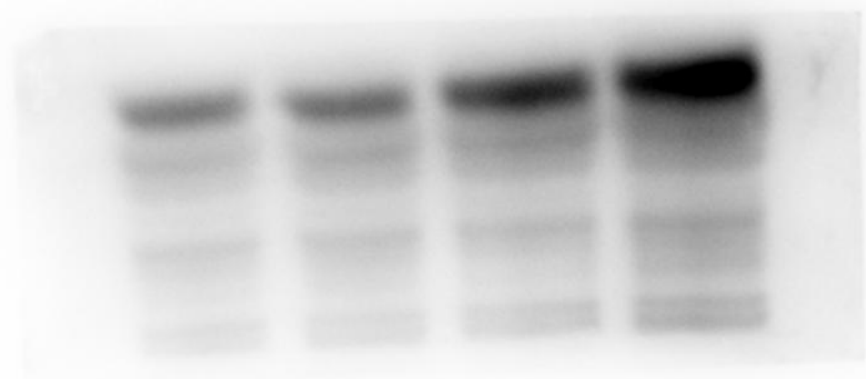

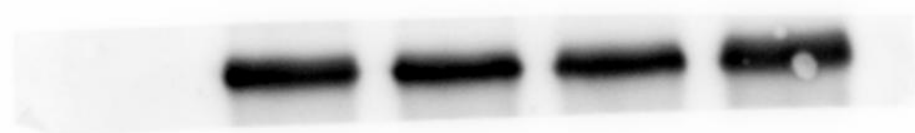

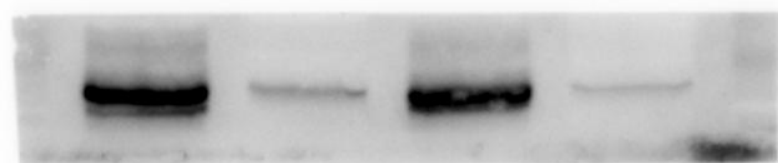



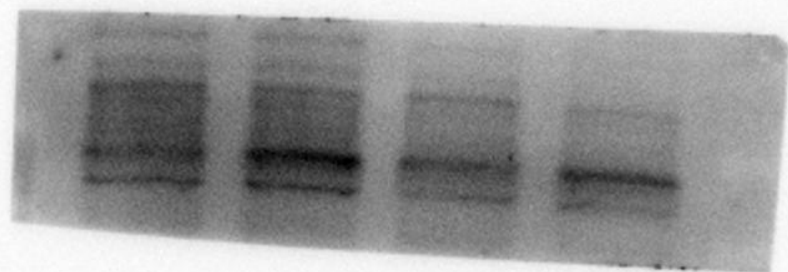

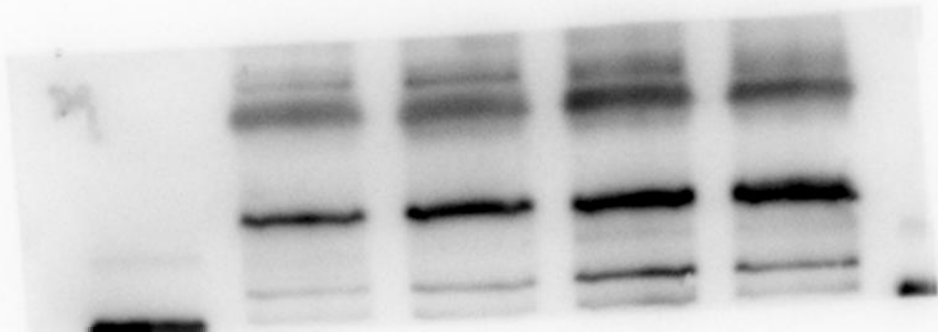

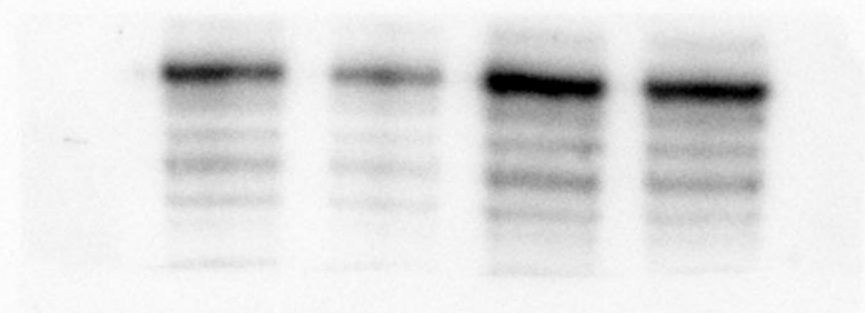

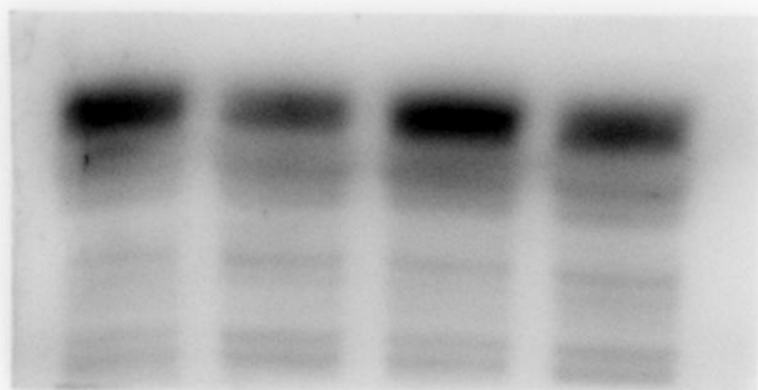

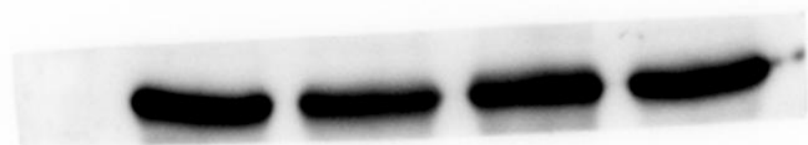

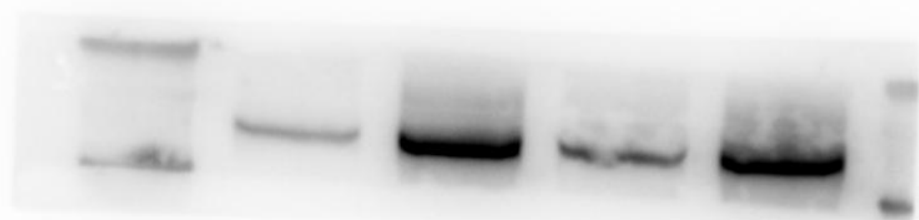

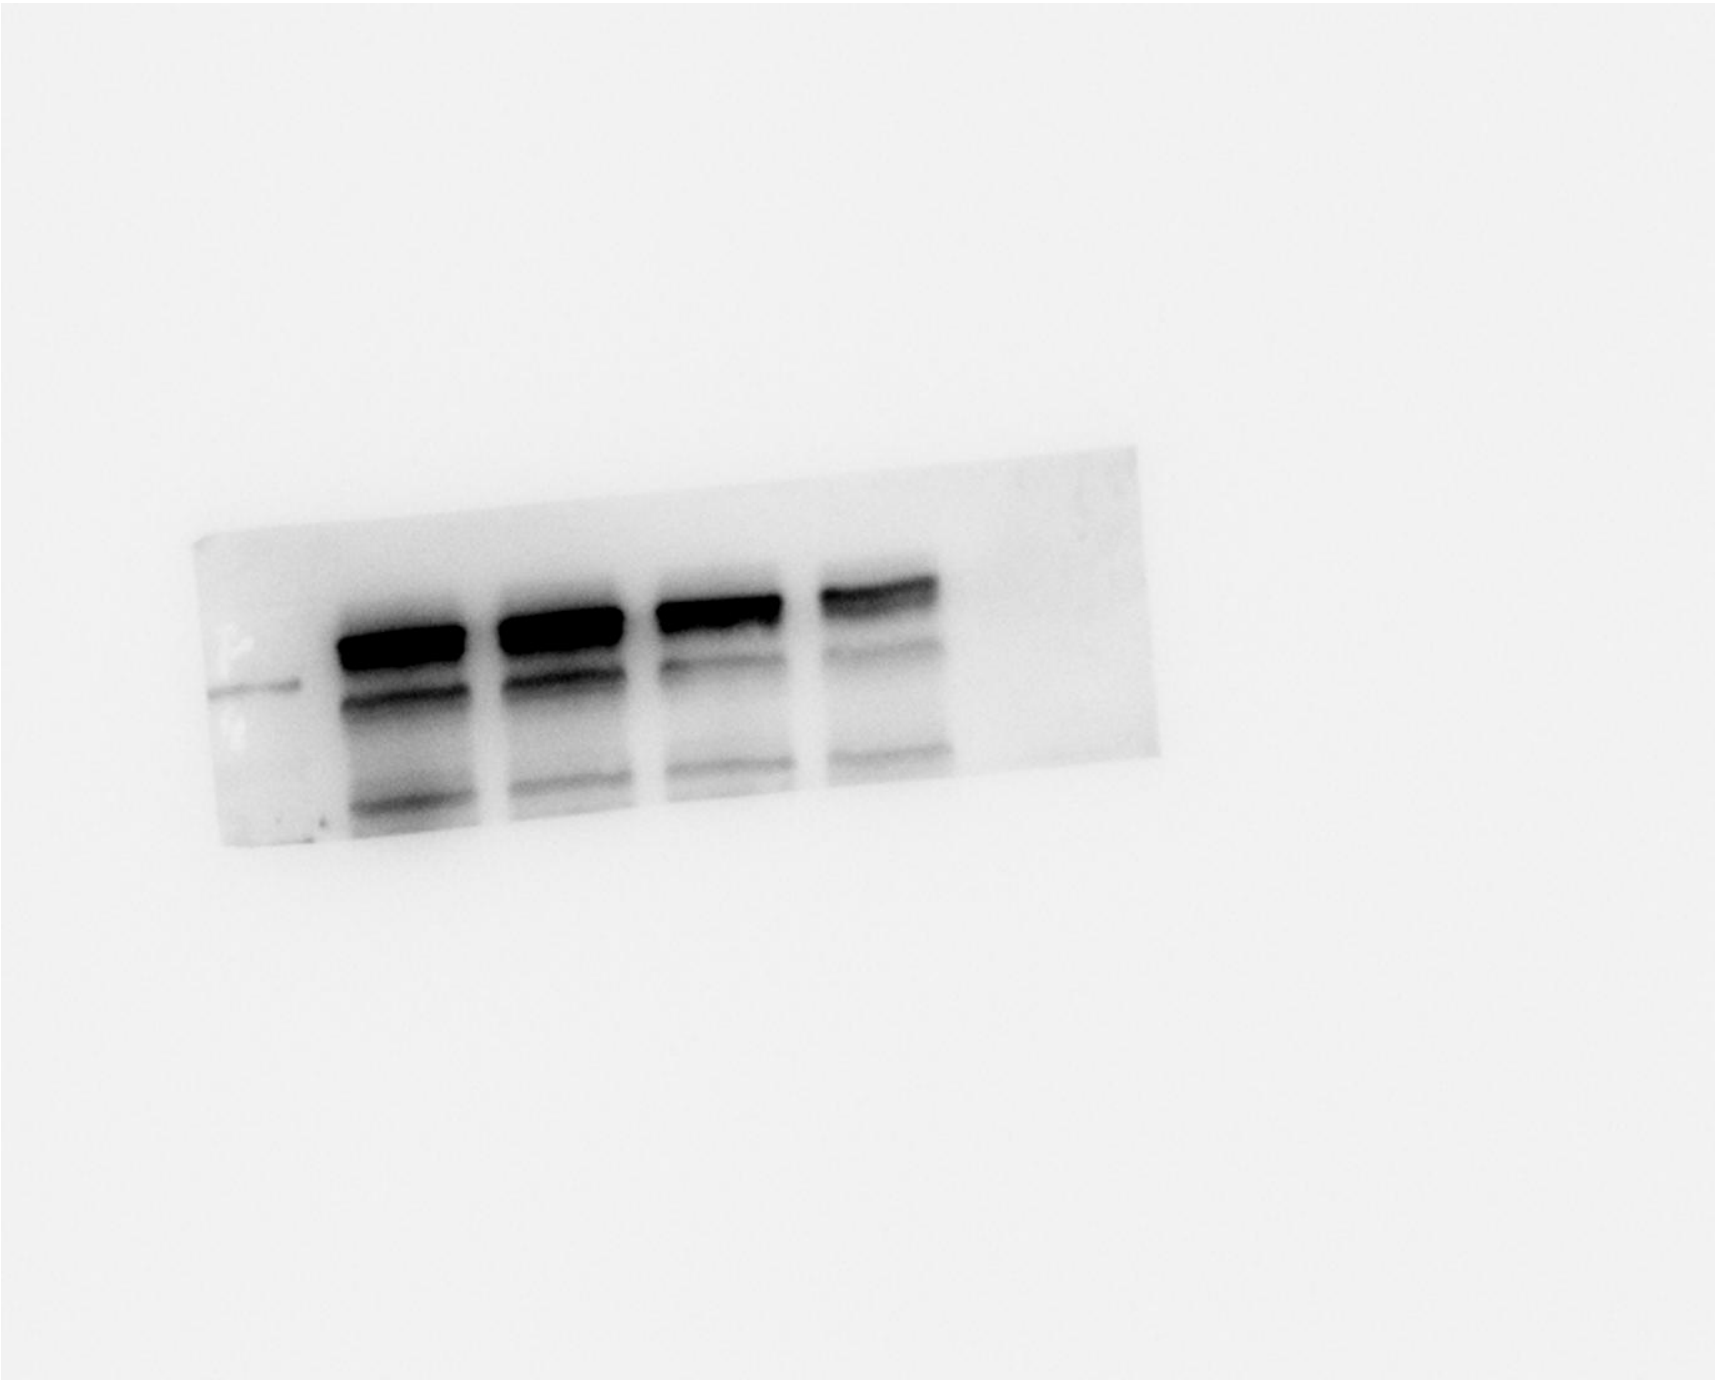

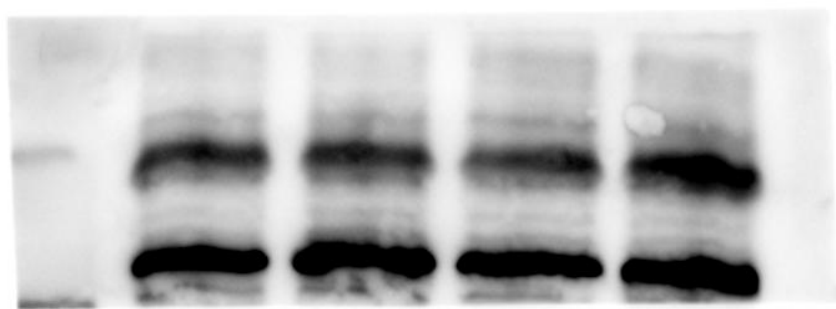



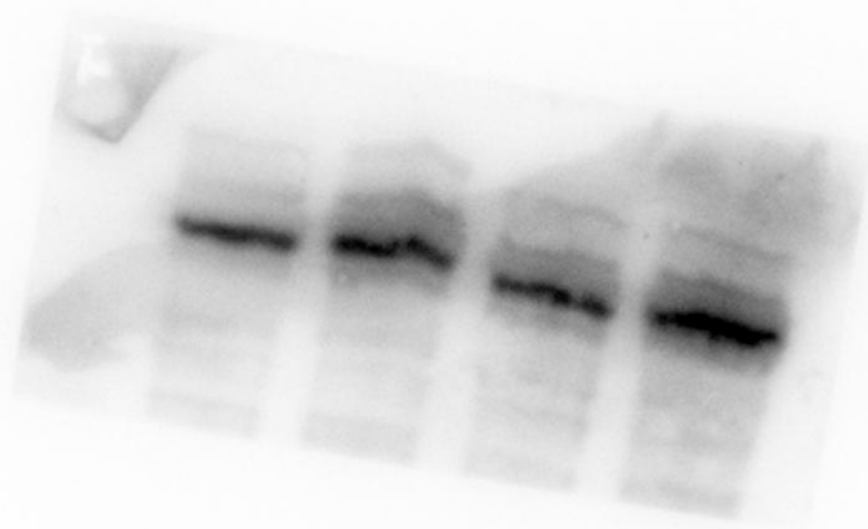

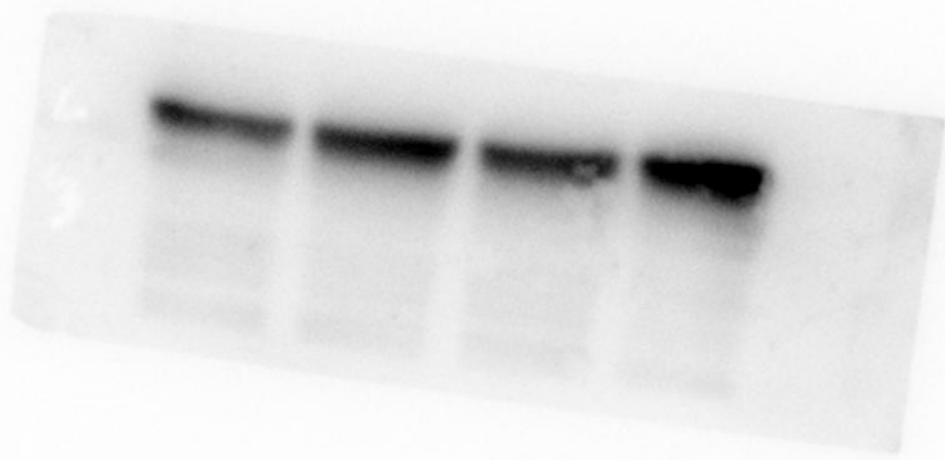

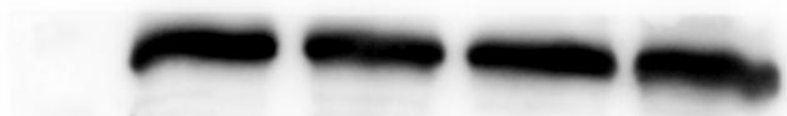

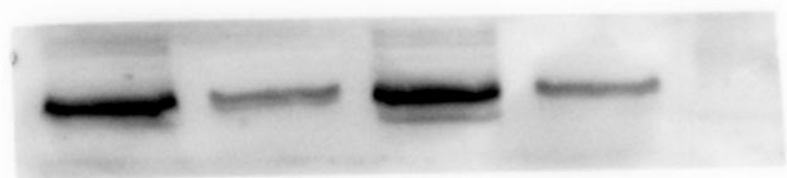

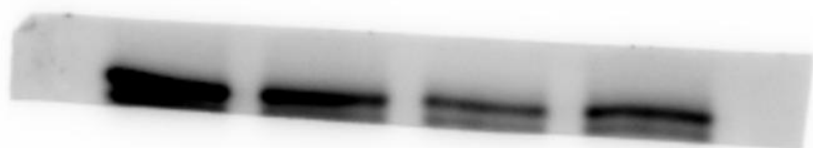

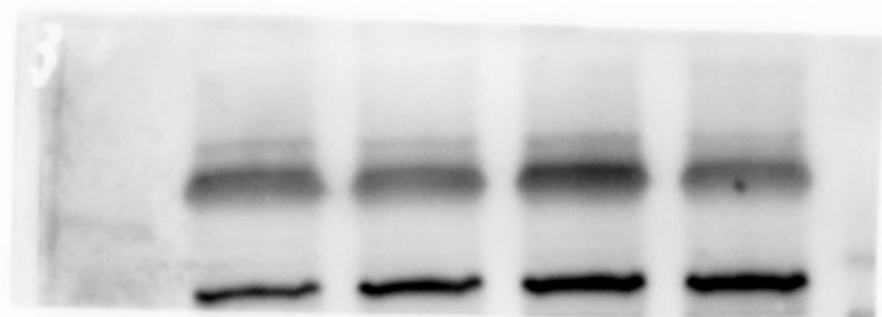

FIG4

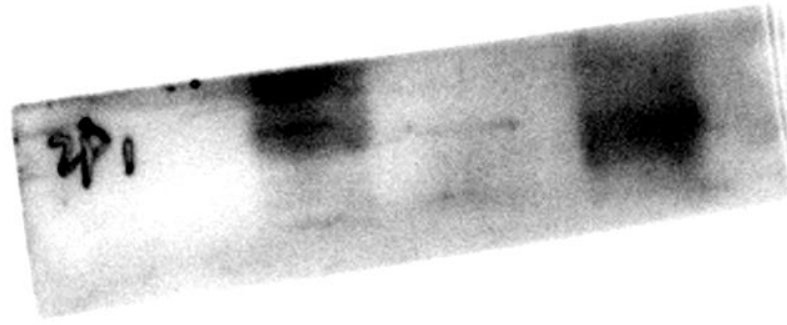

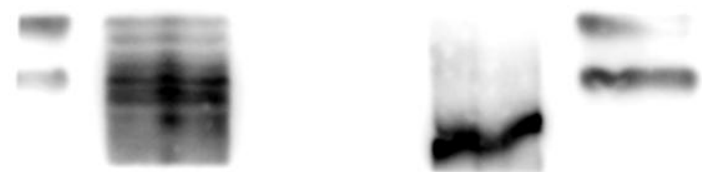



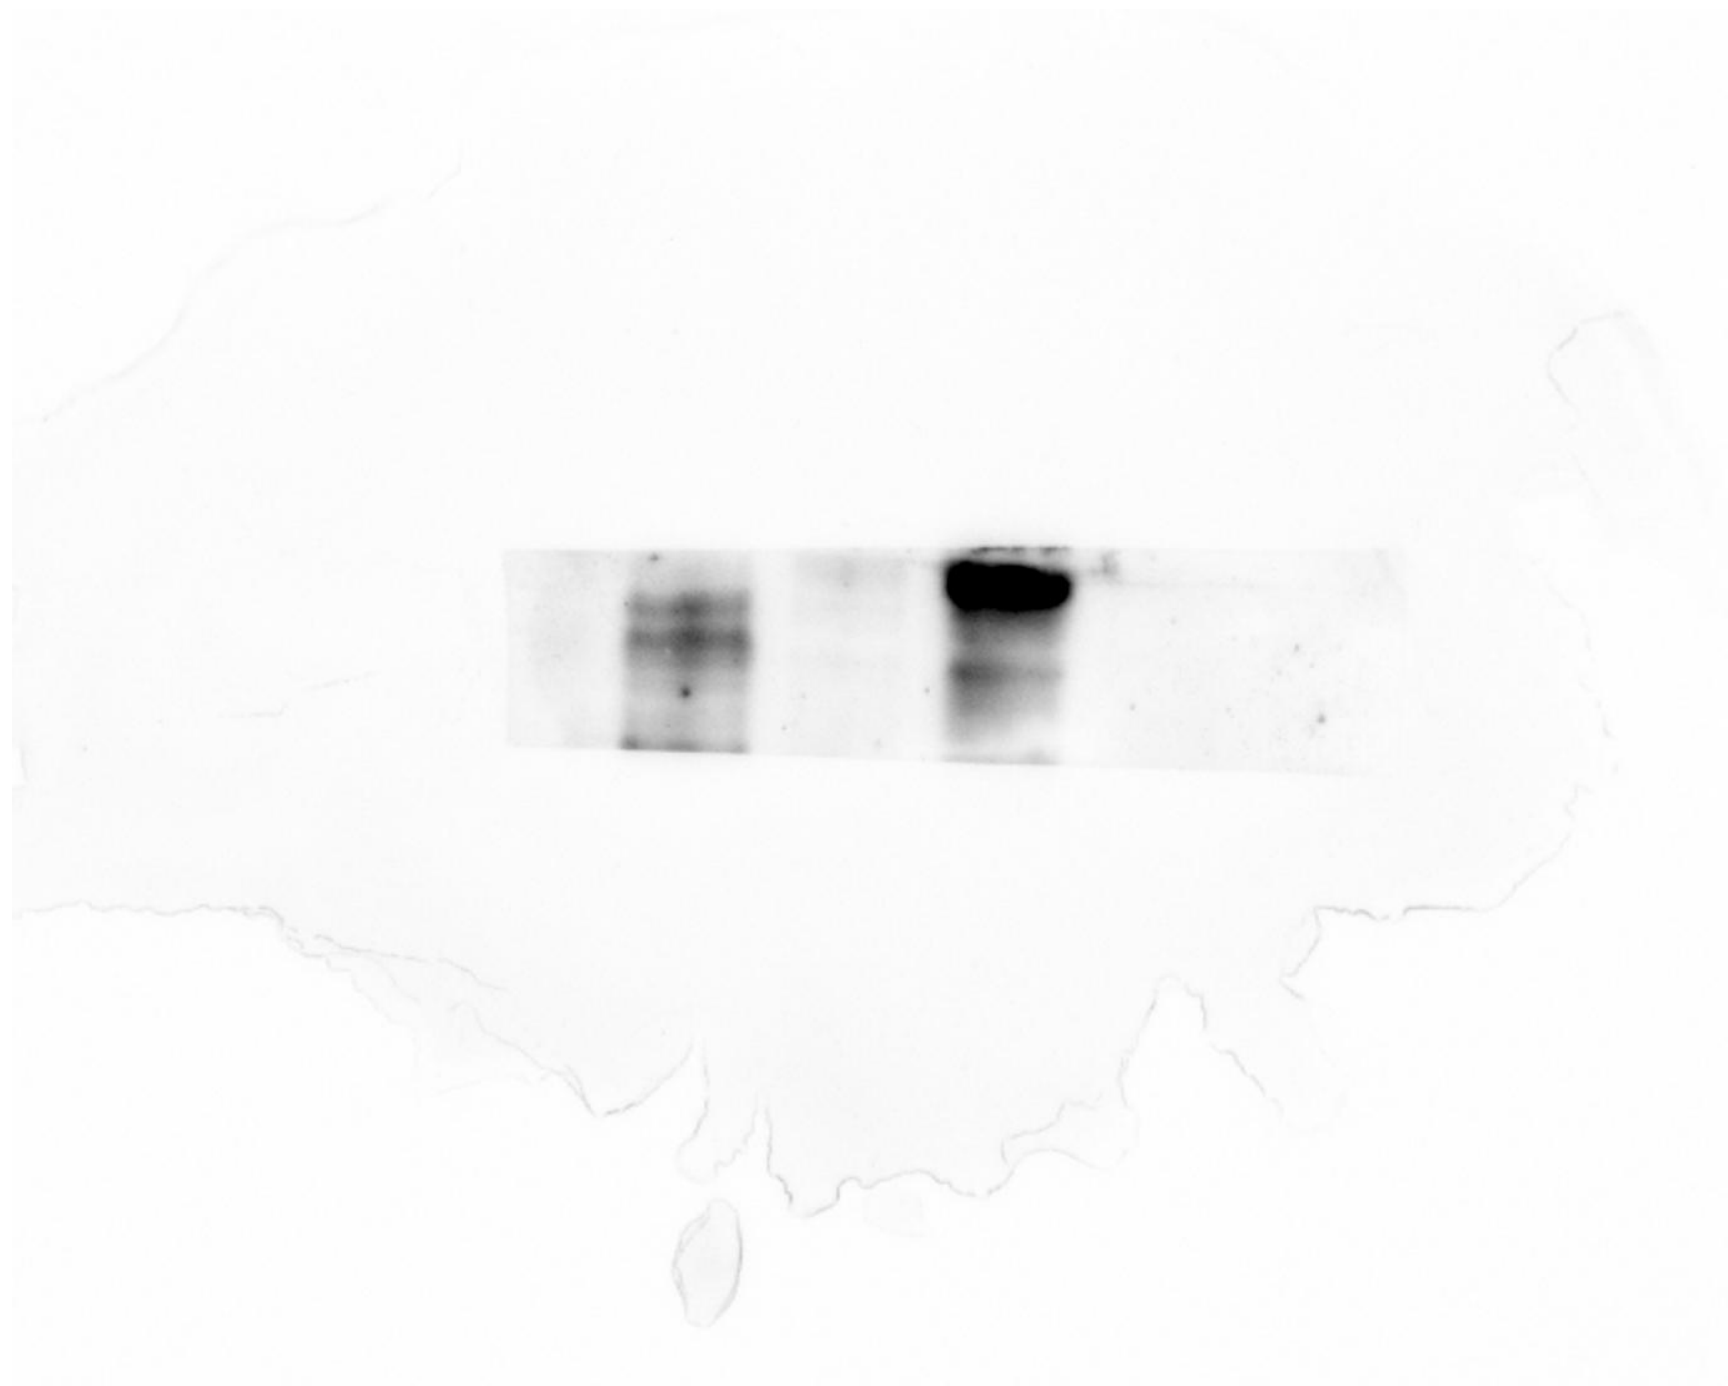

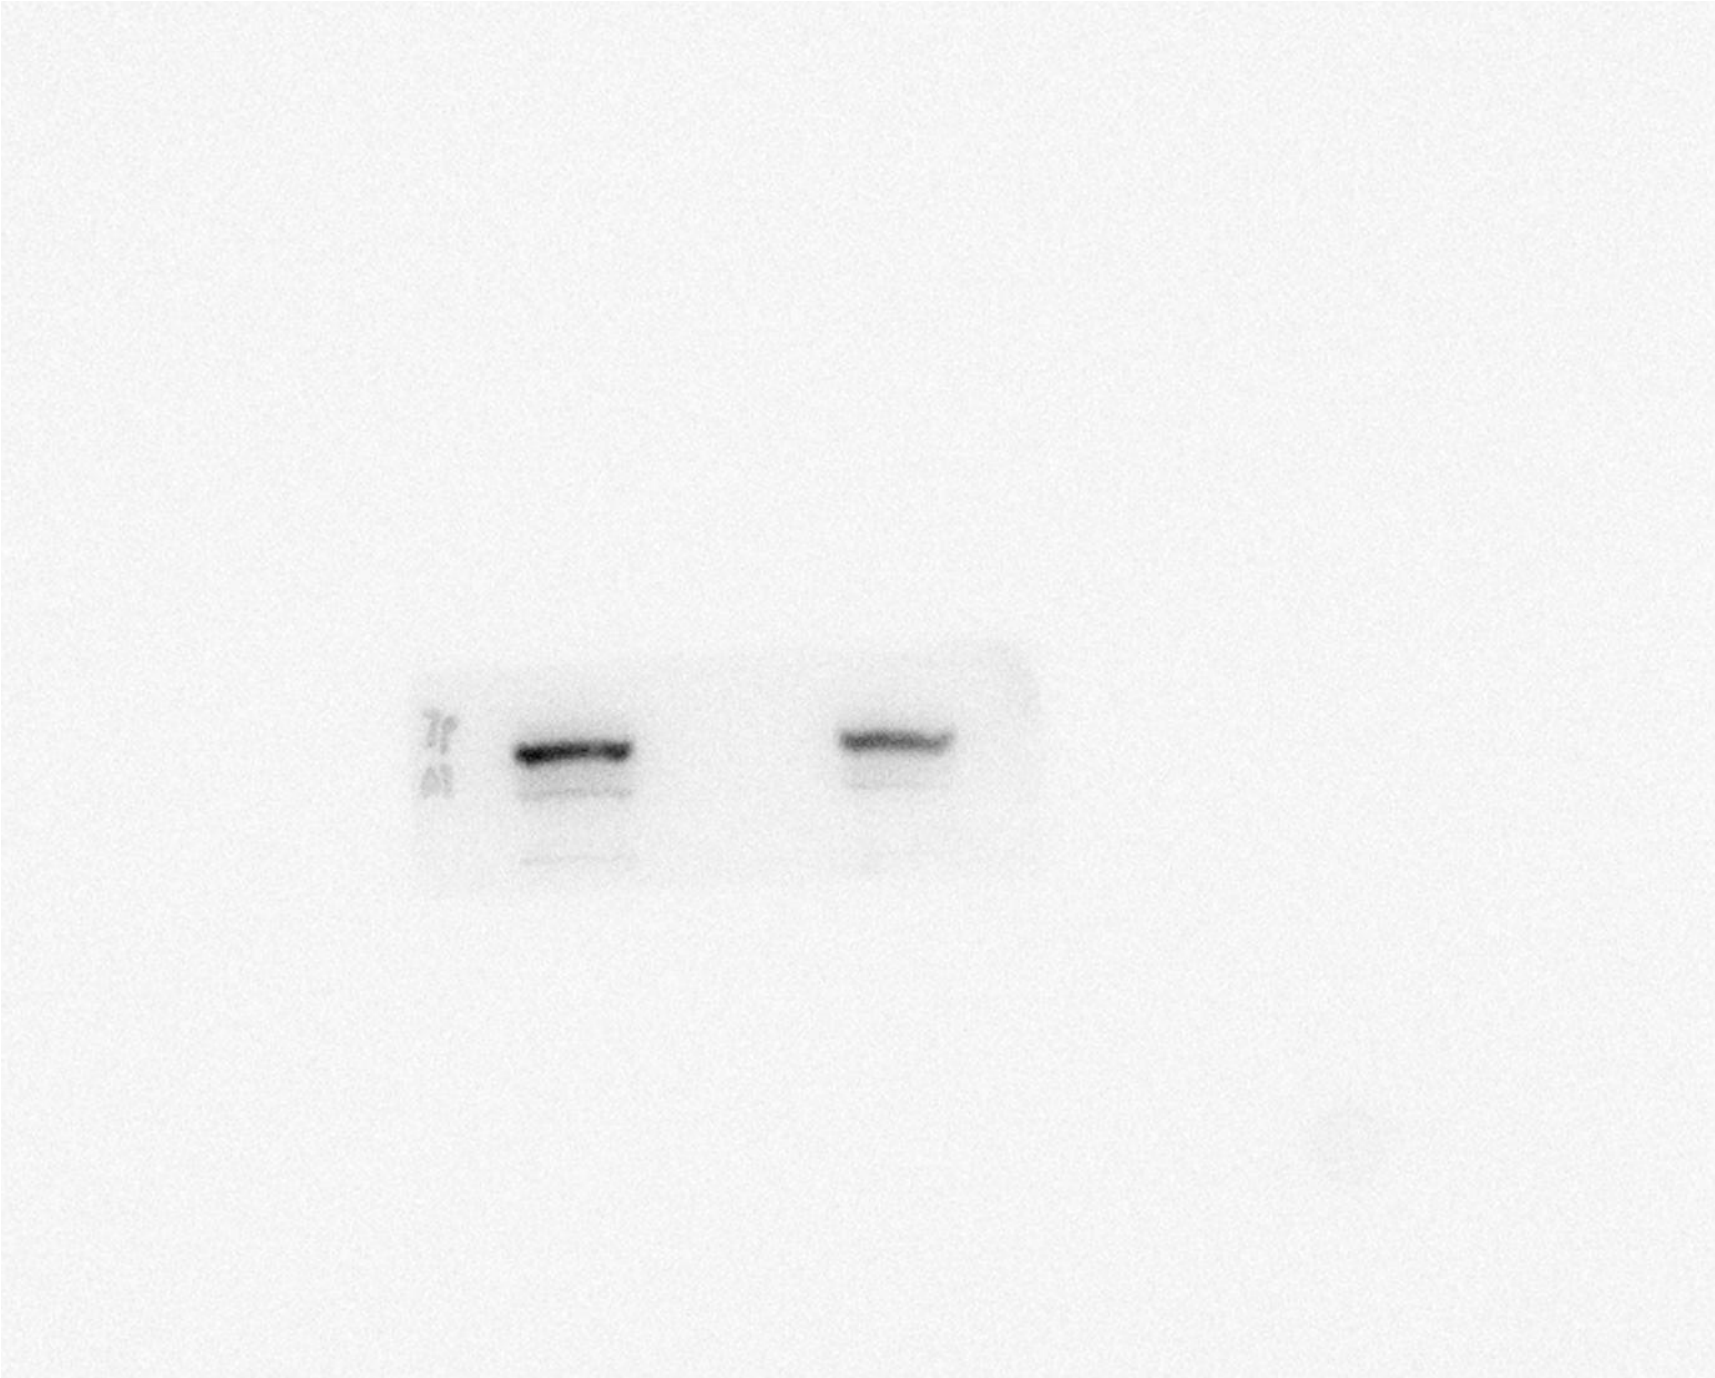

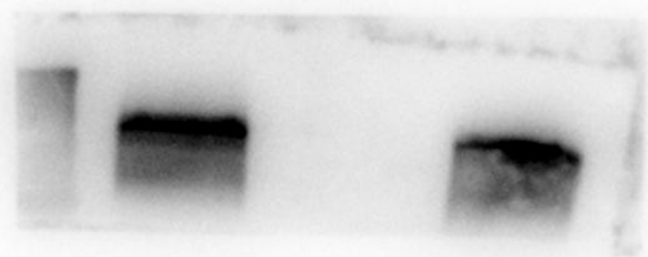

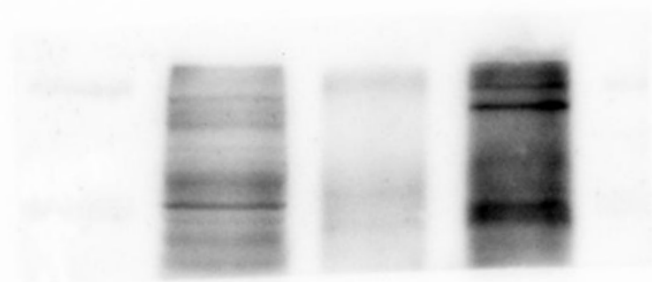

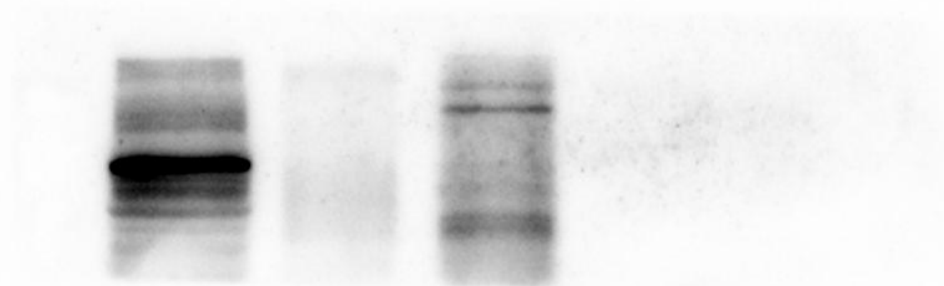

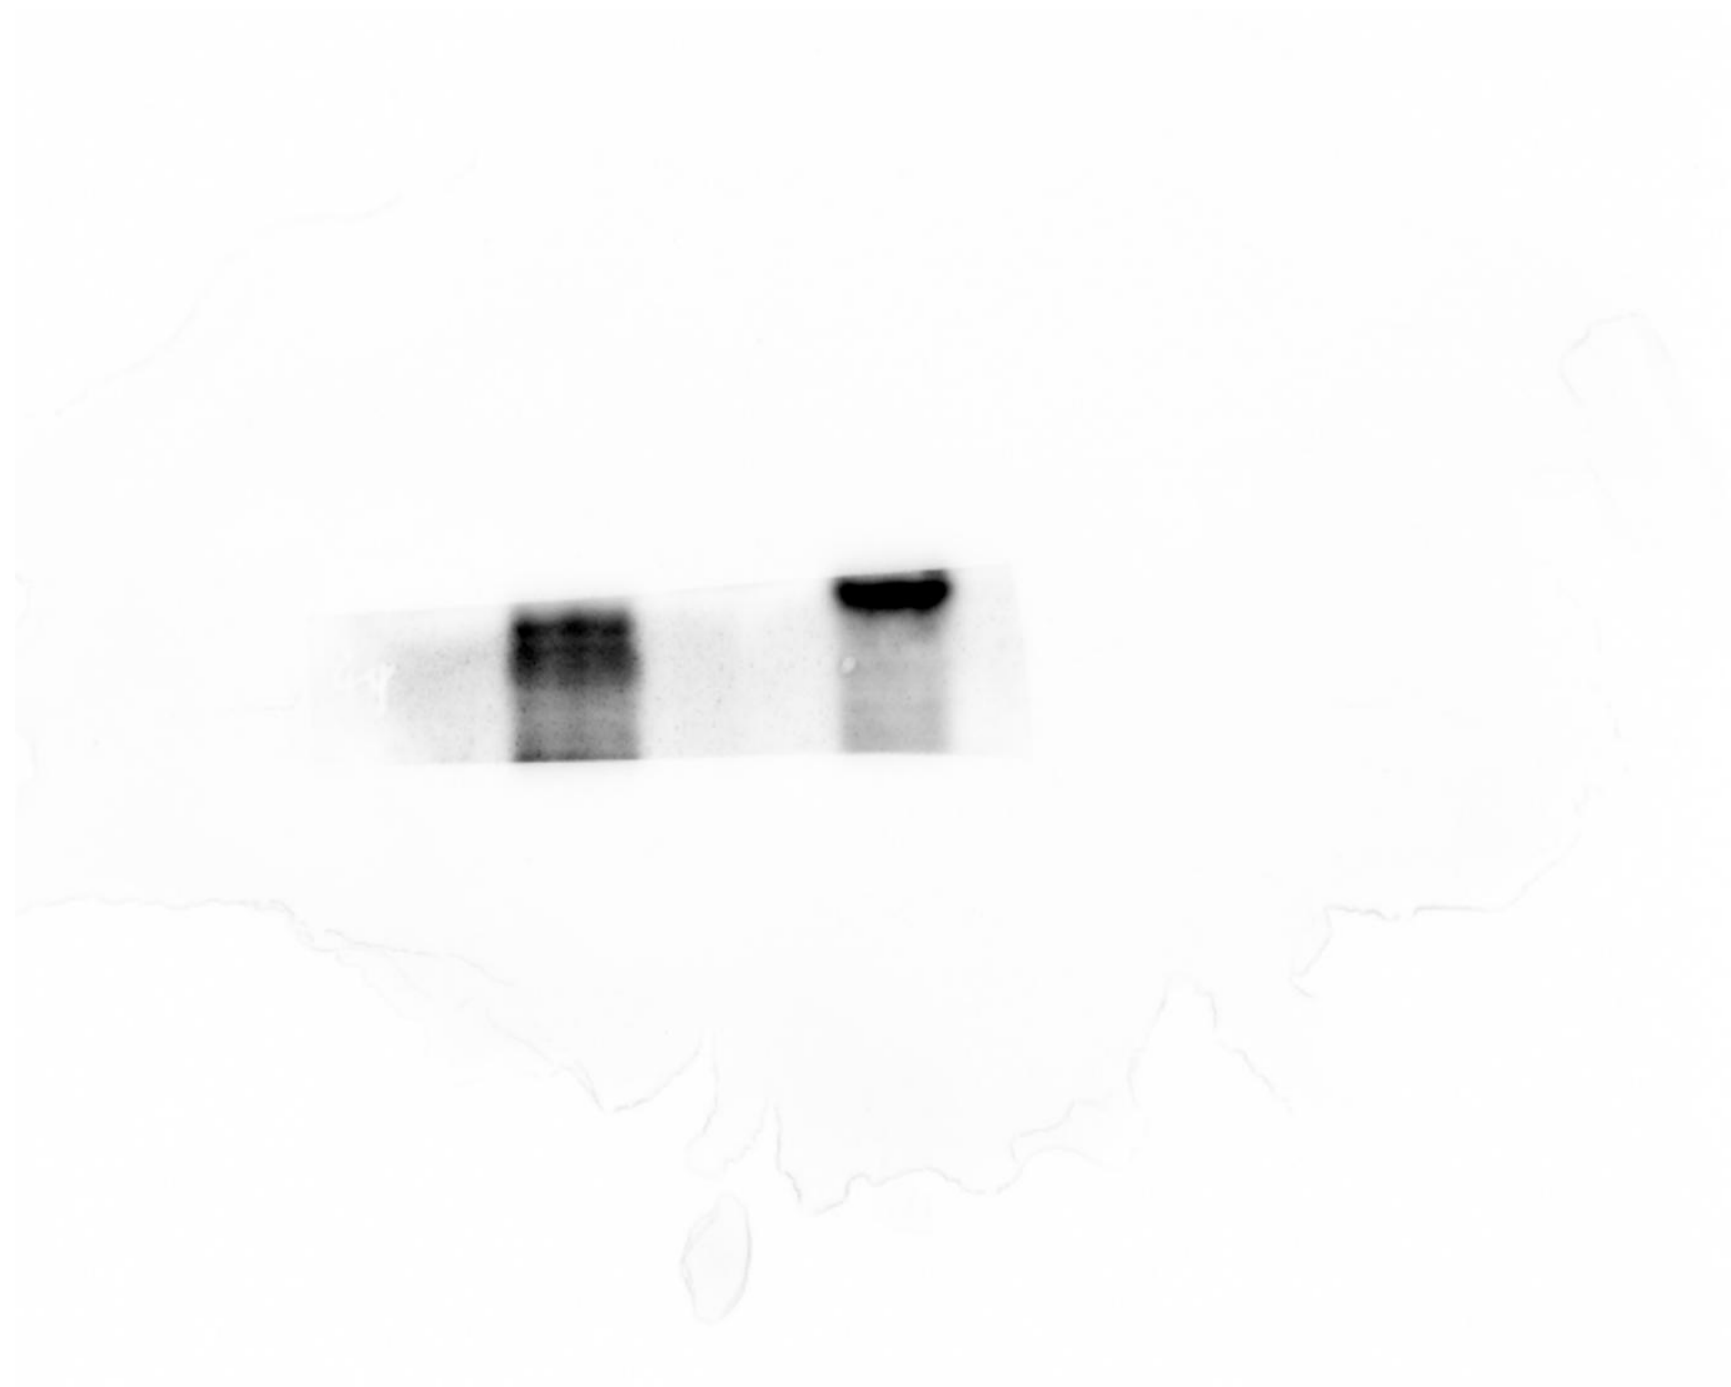

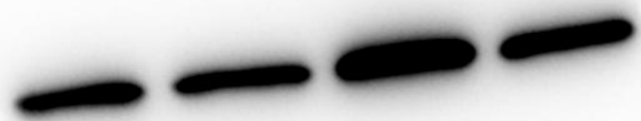

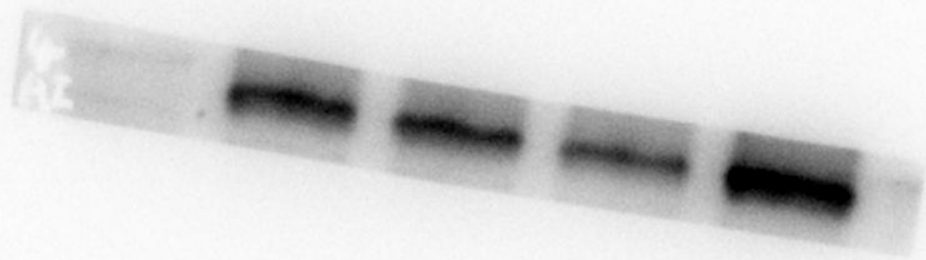



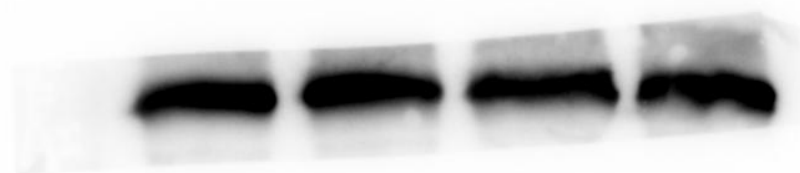

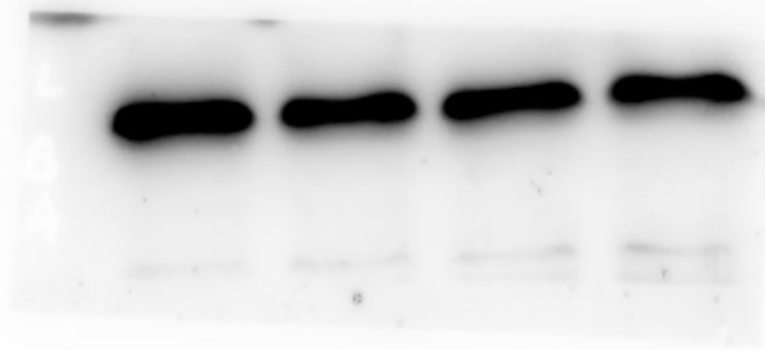

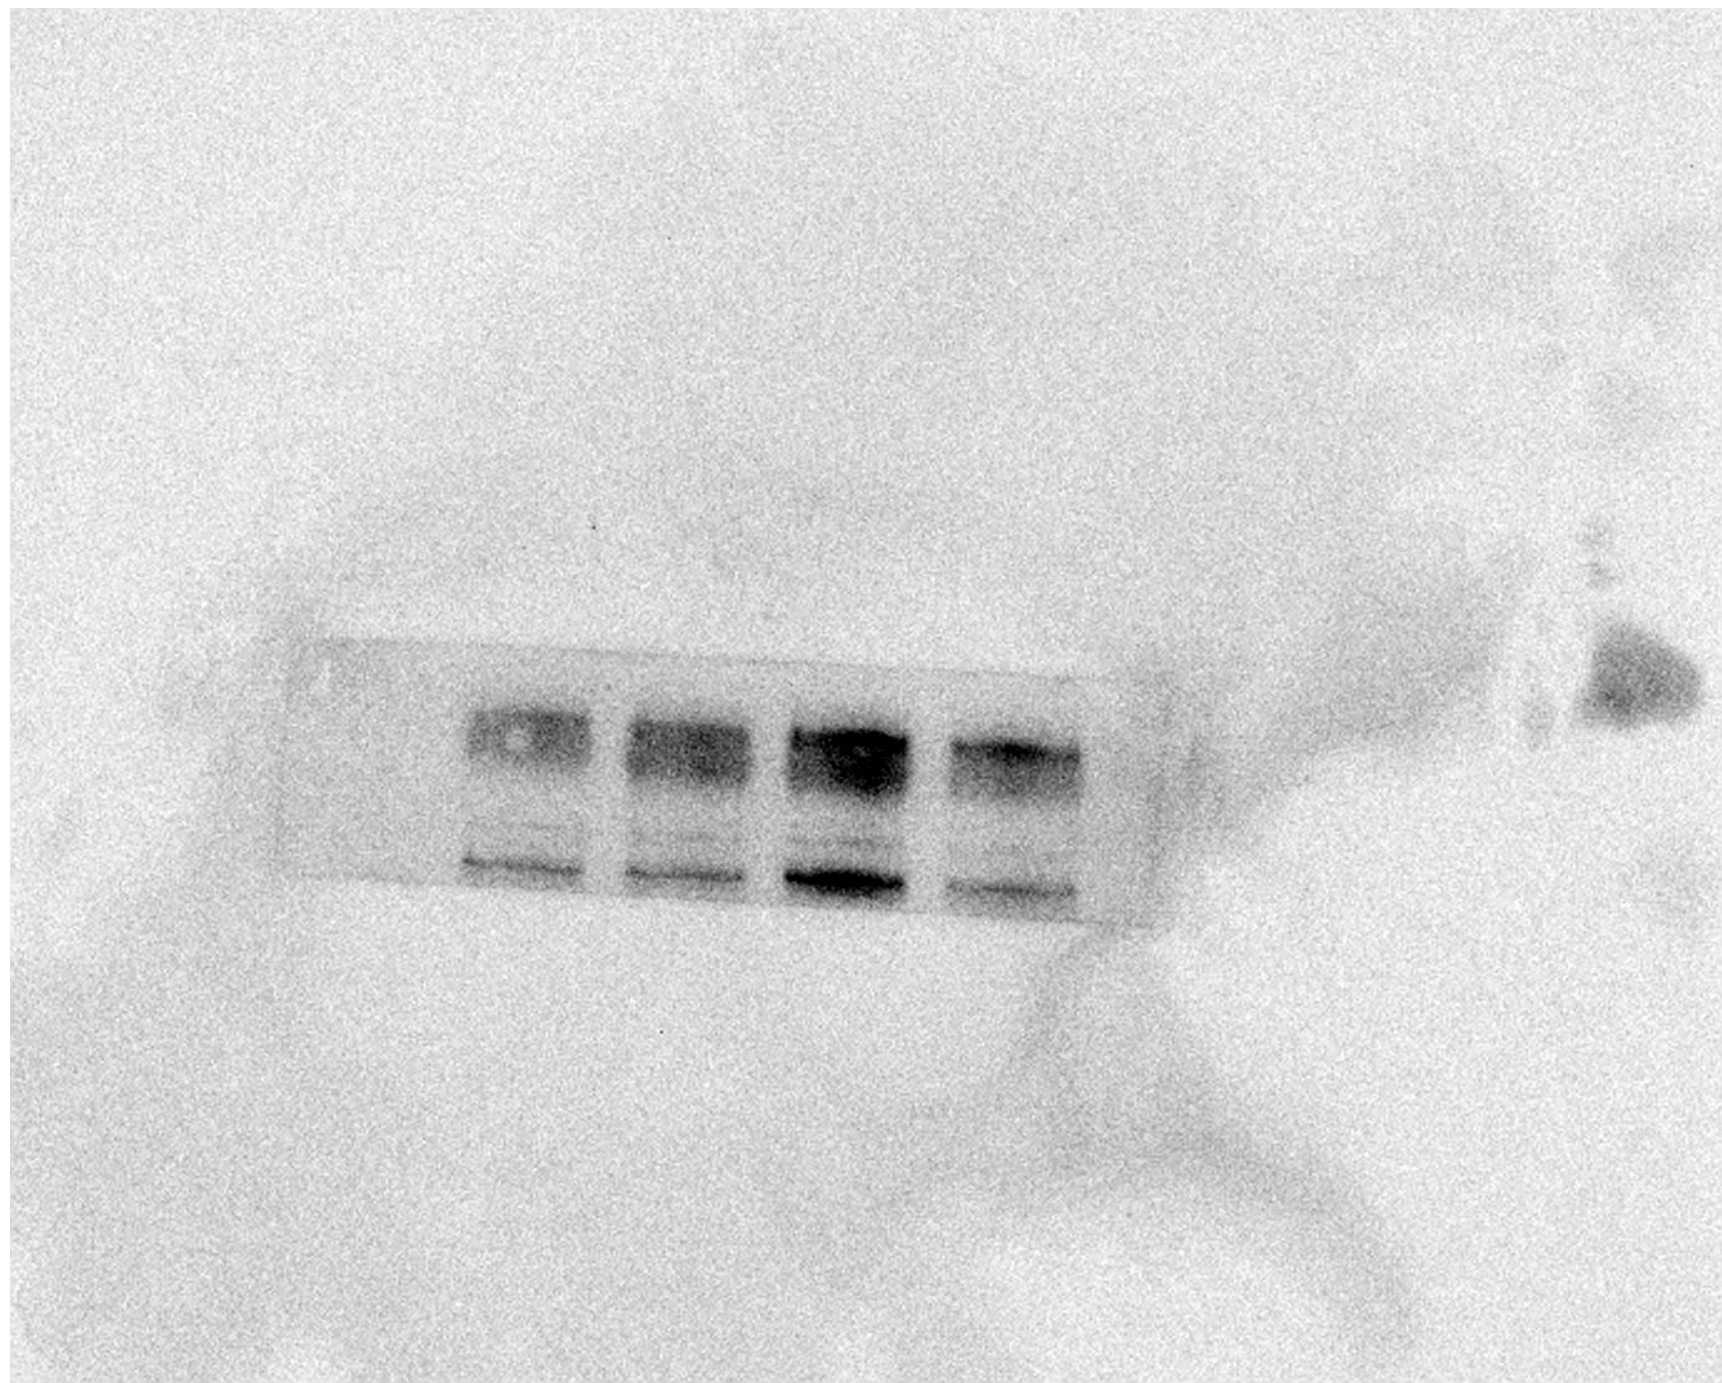

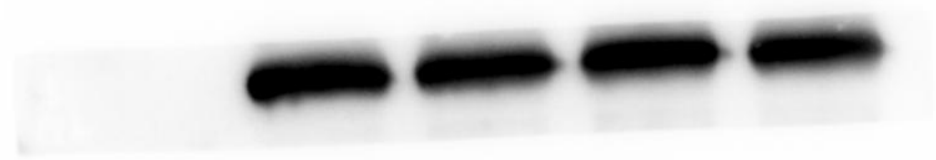

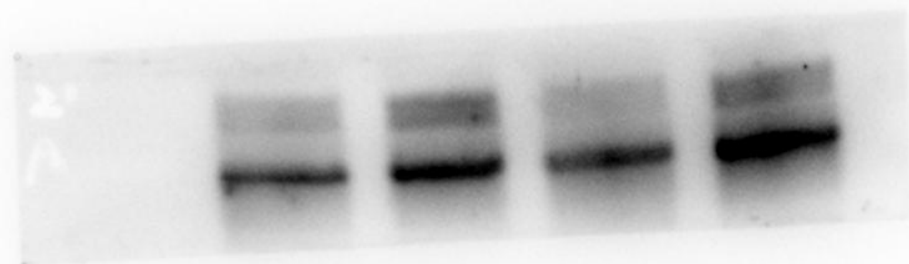



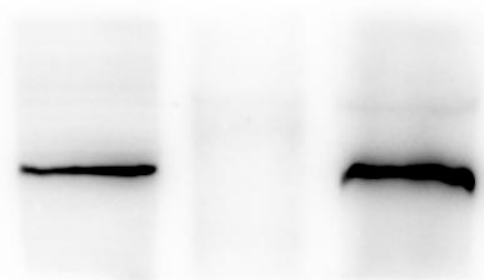

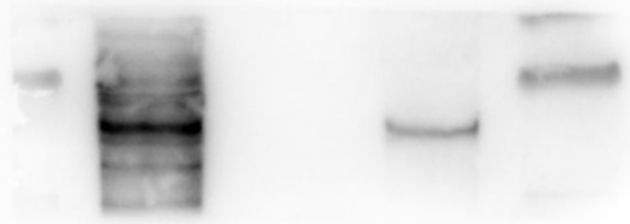



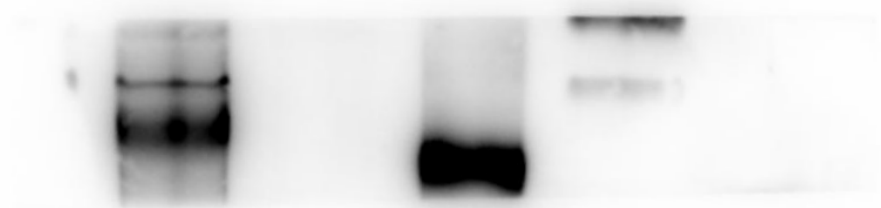

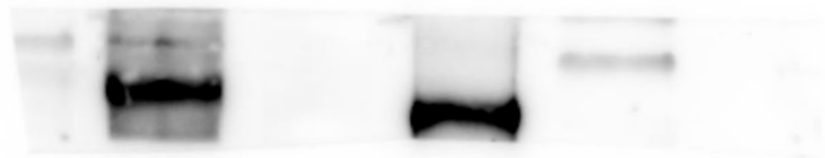

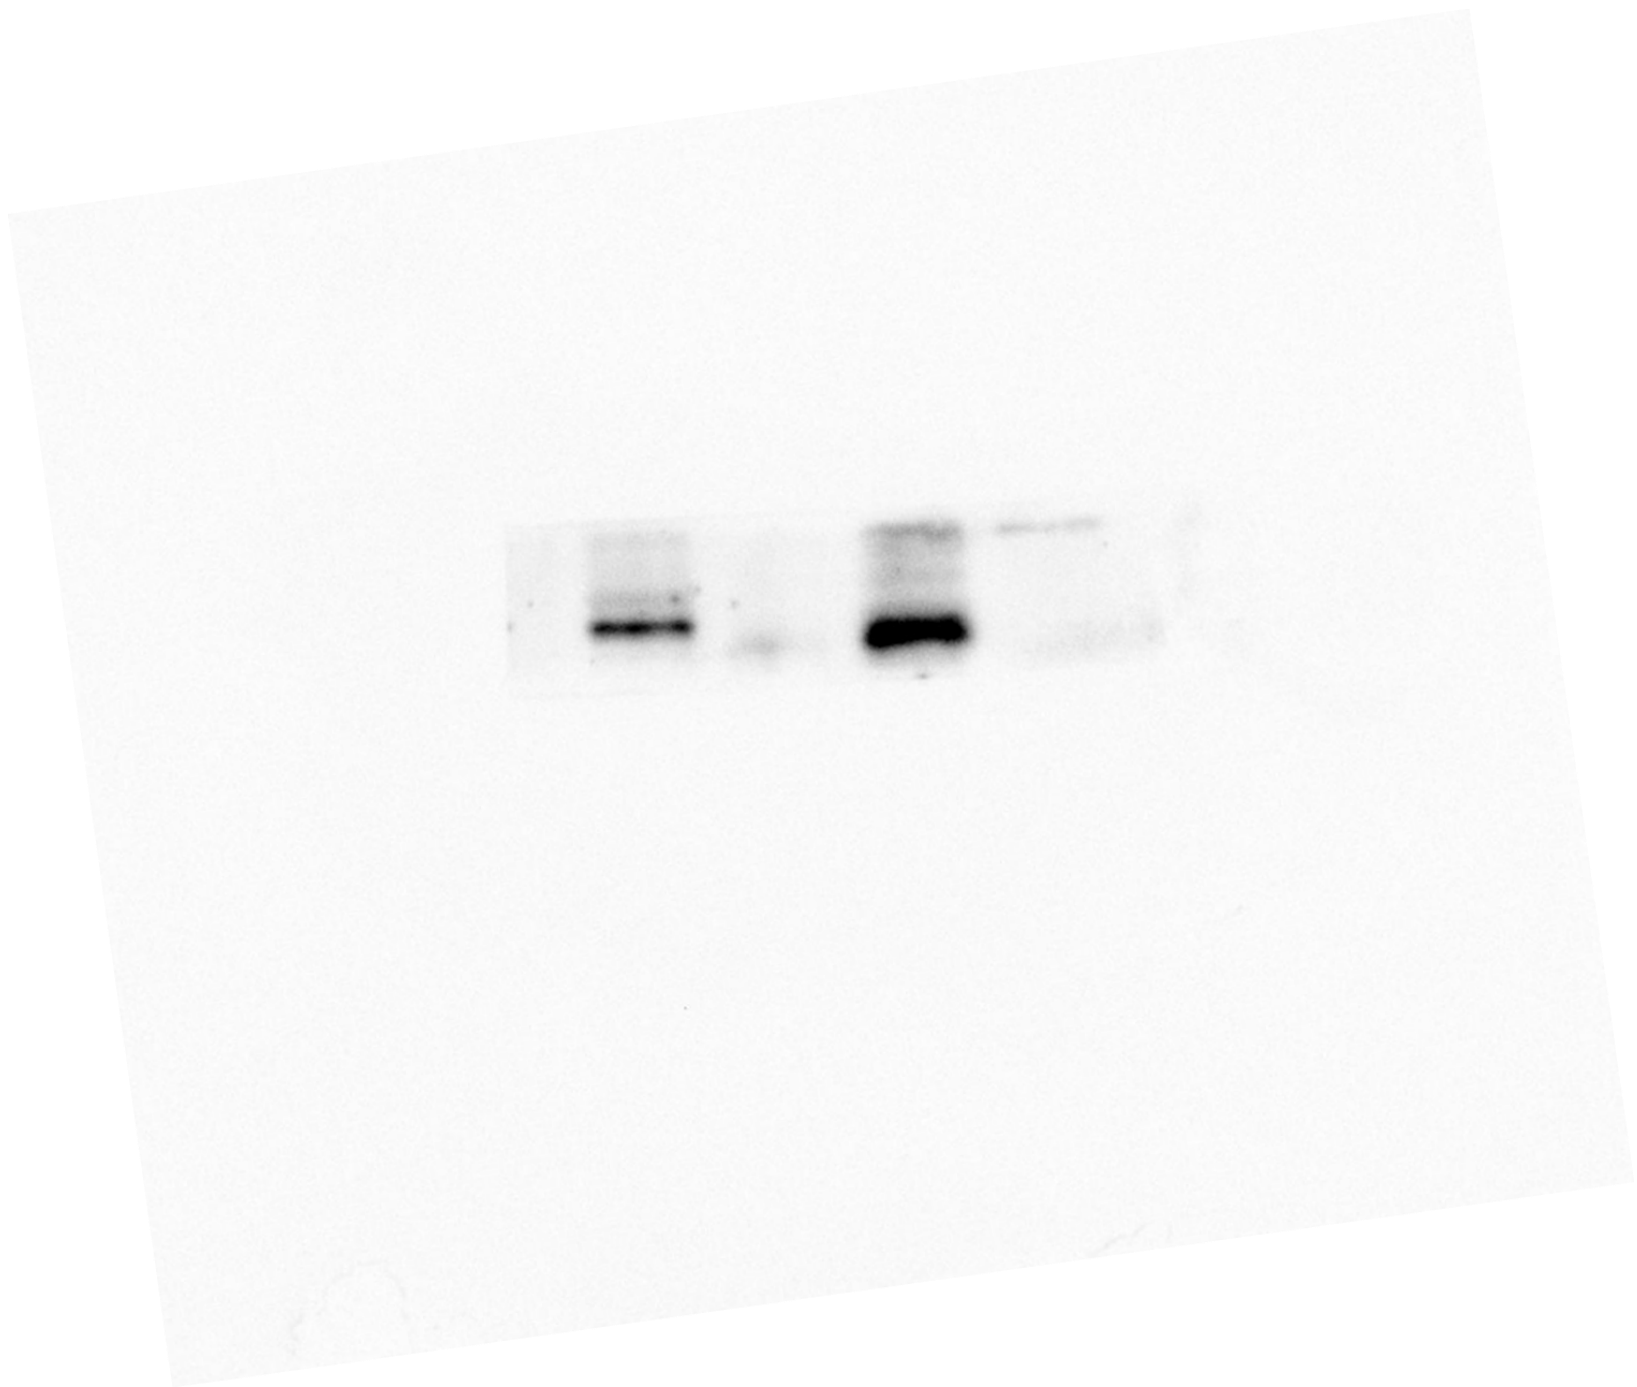

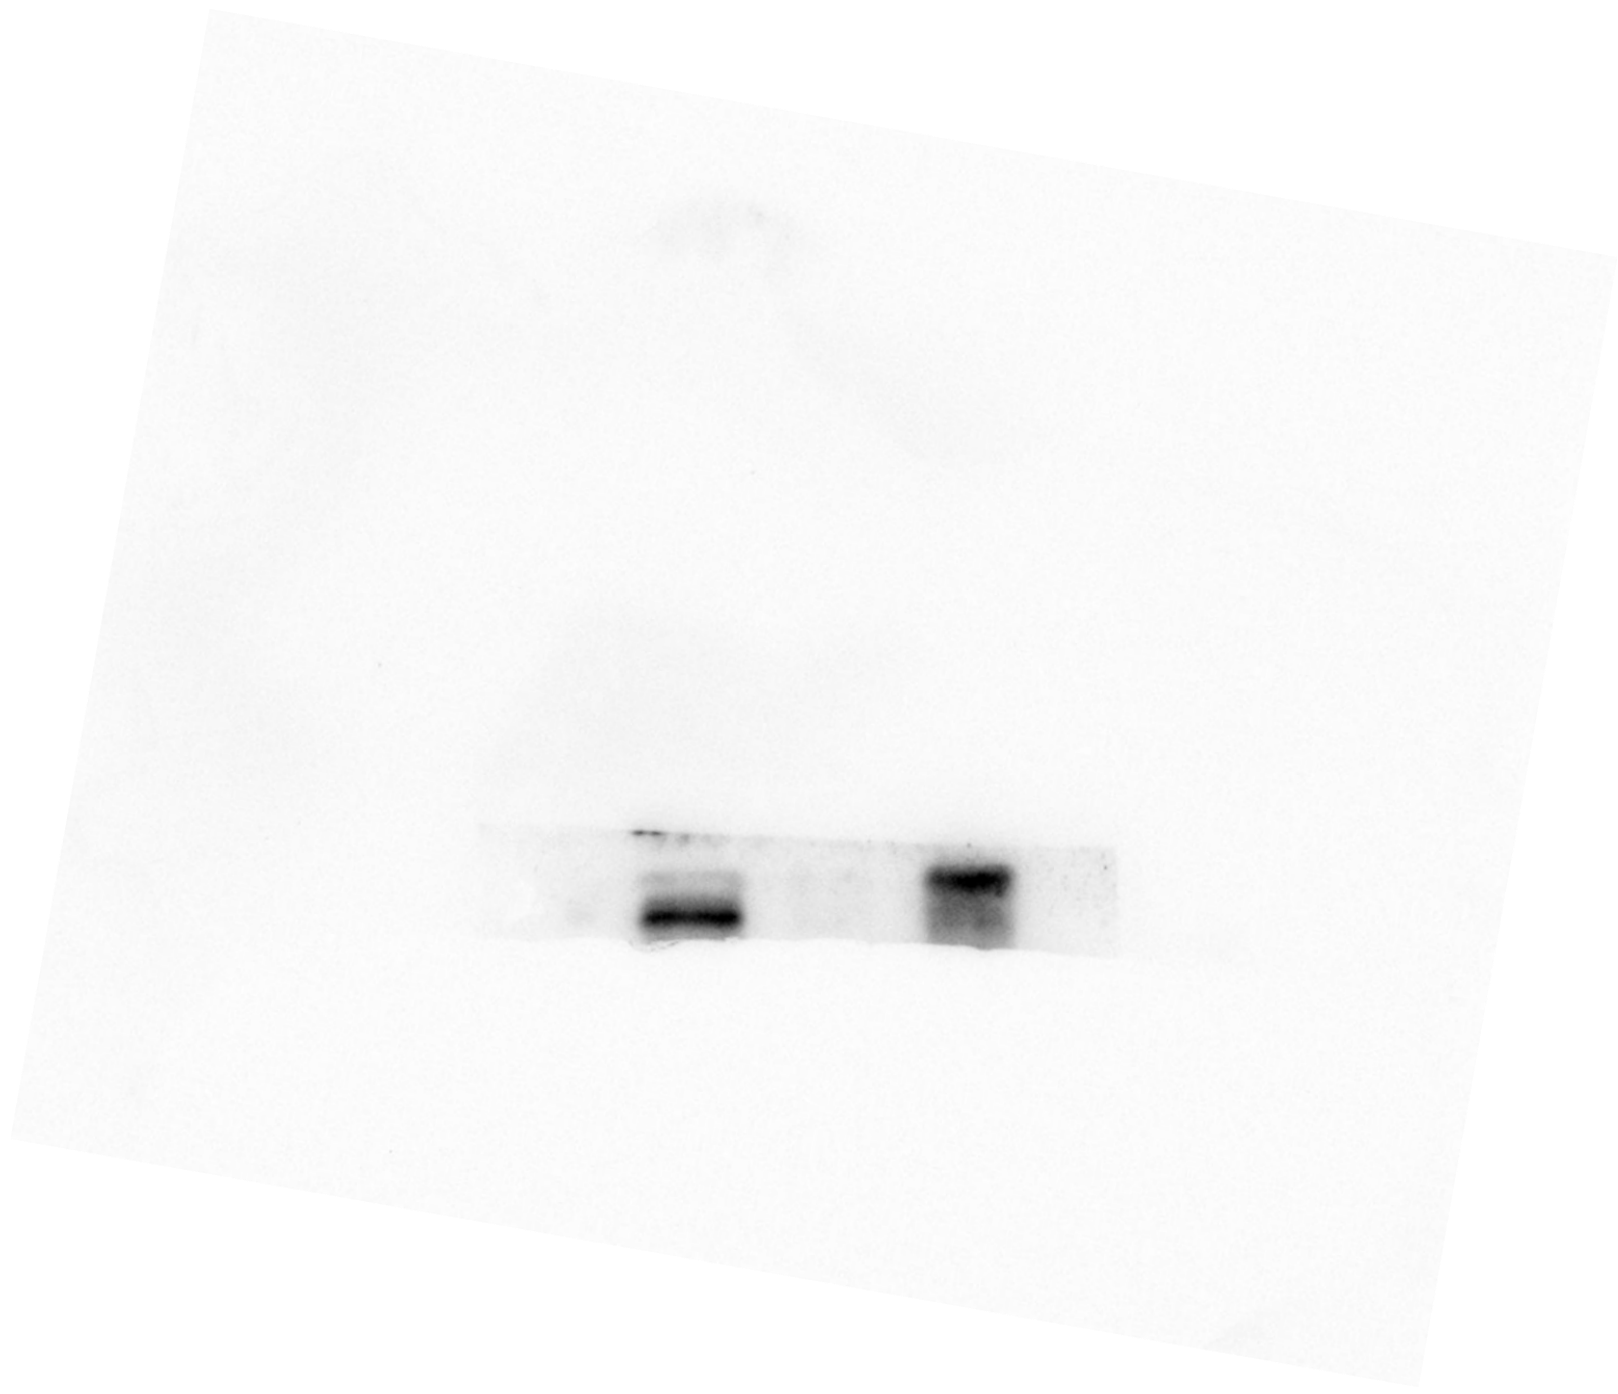

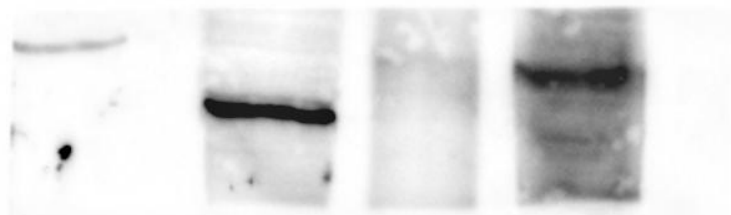

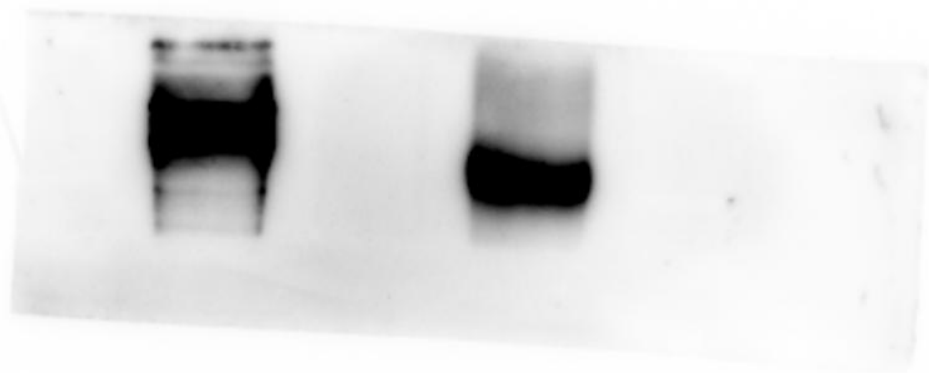

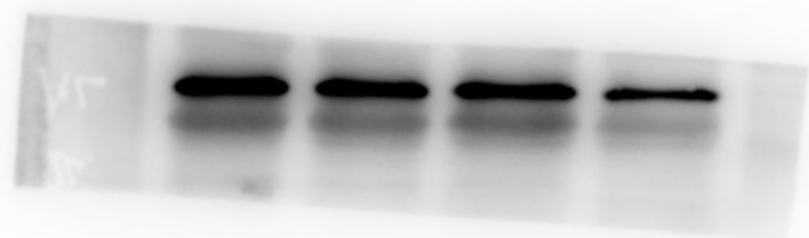

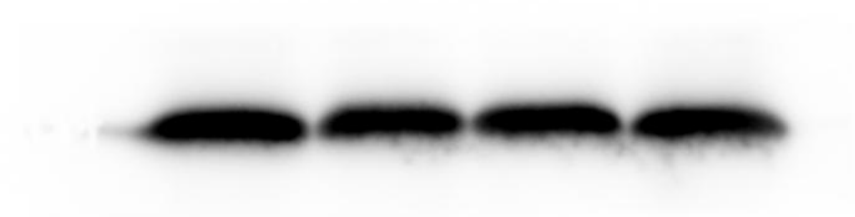



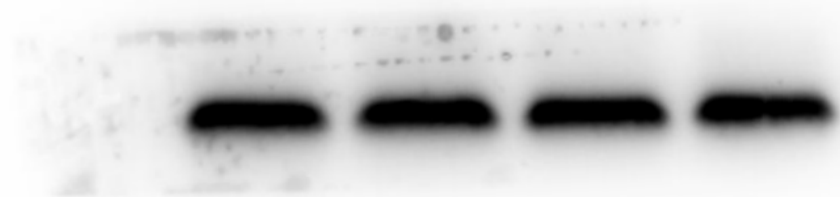

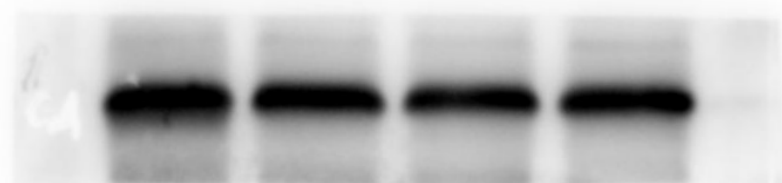

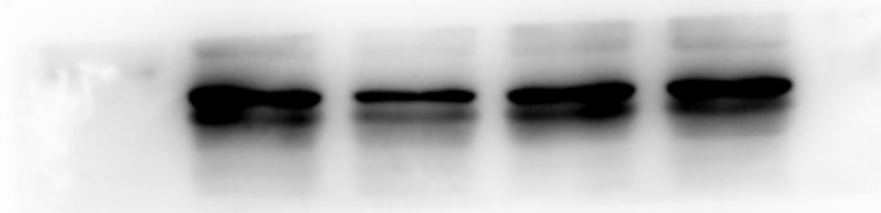

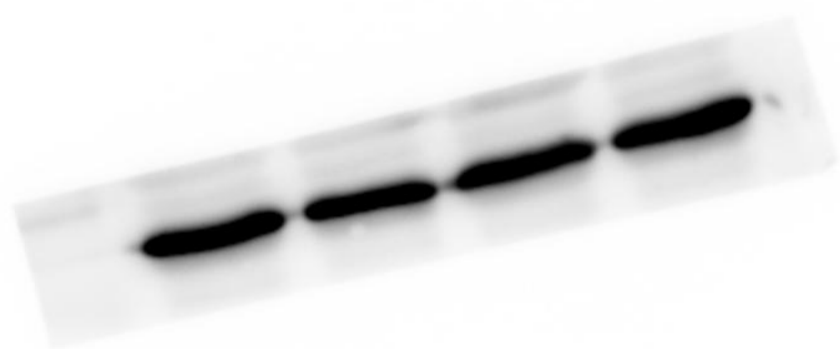

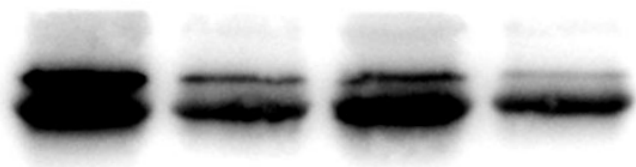

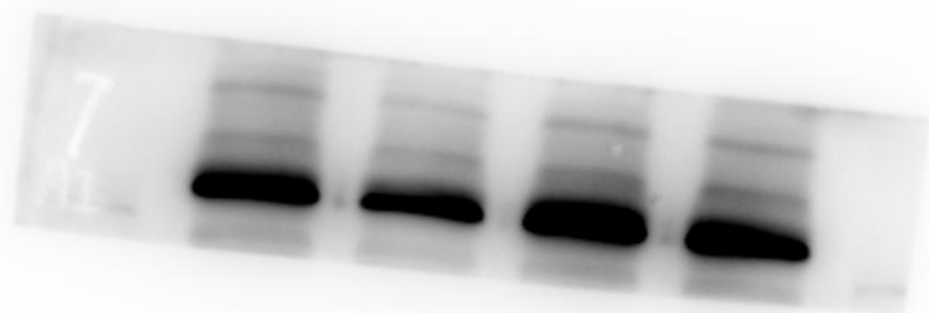

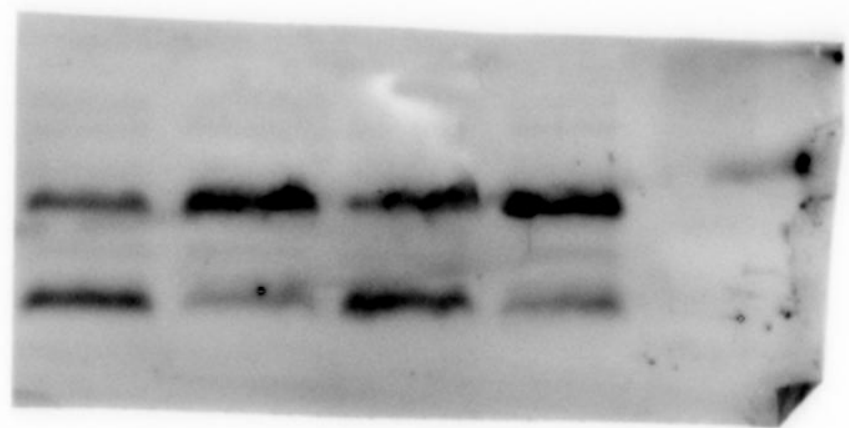

254

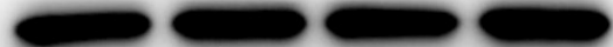



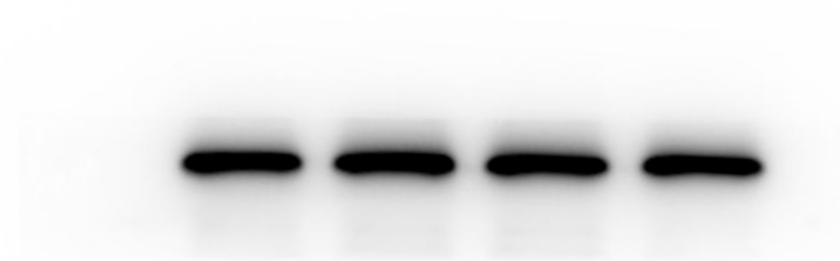

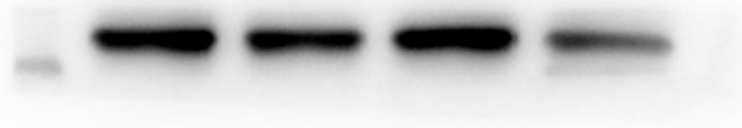

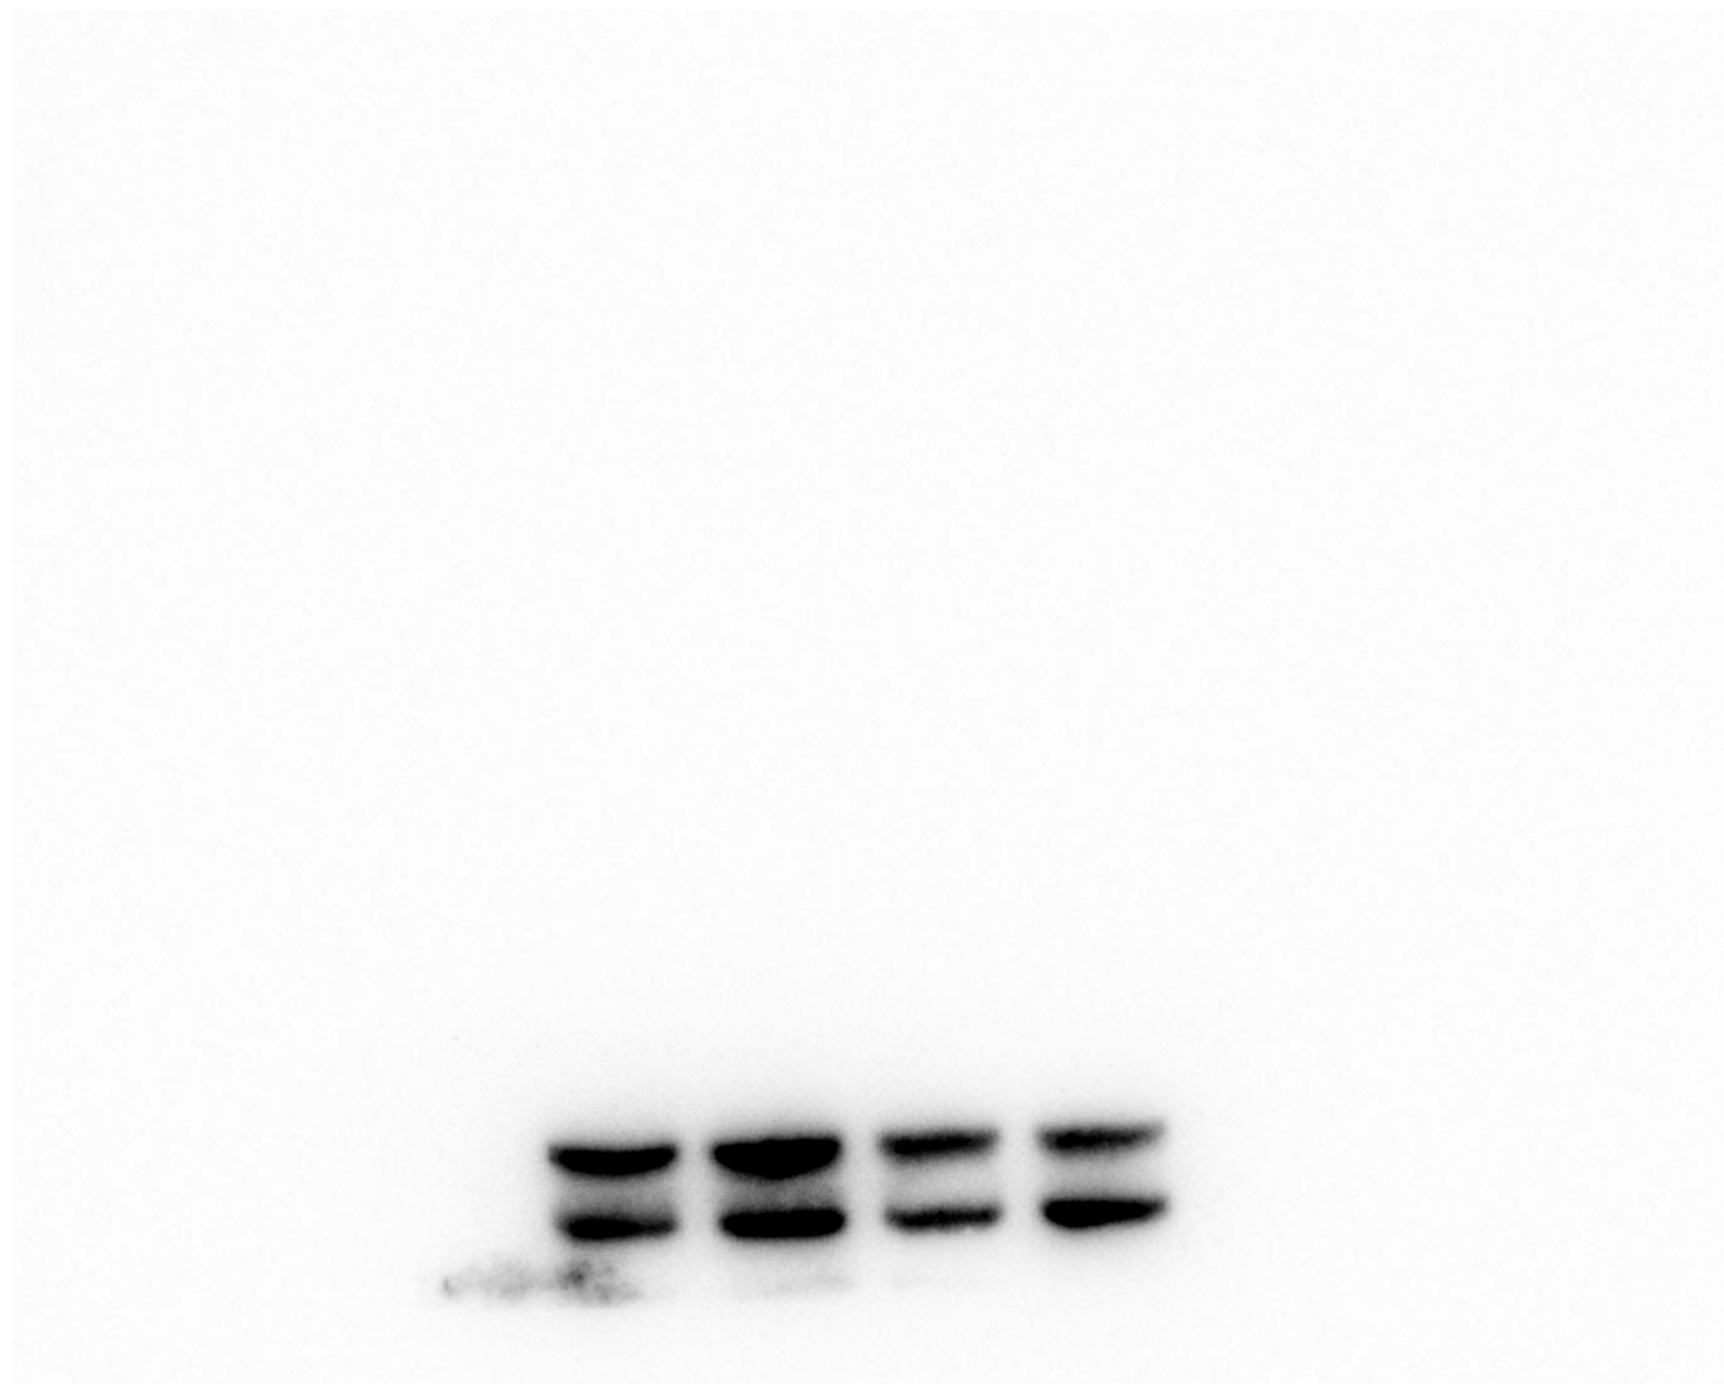

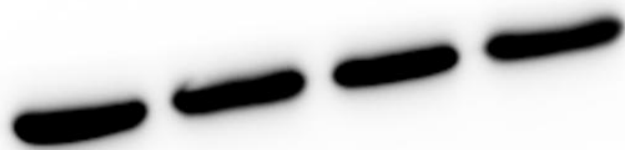

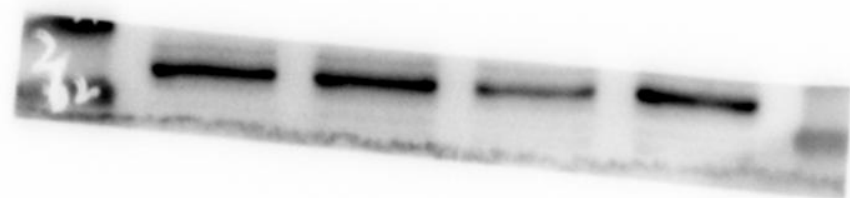

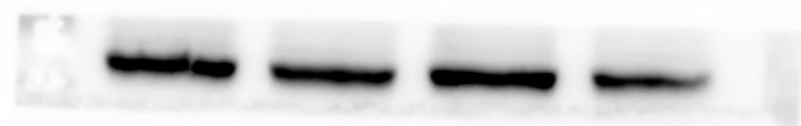

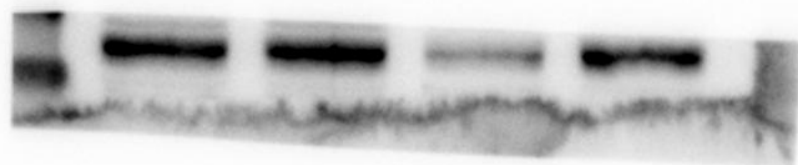

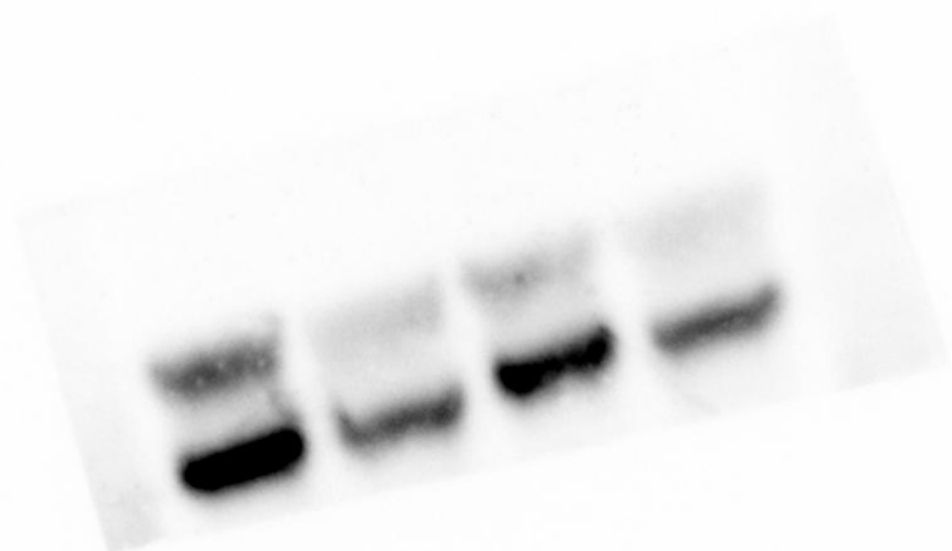



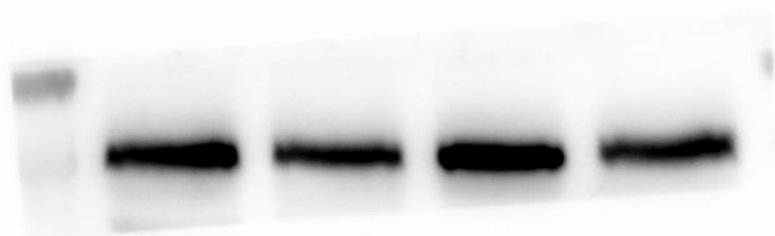

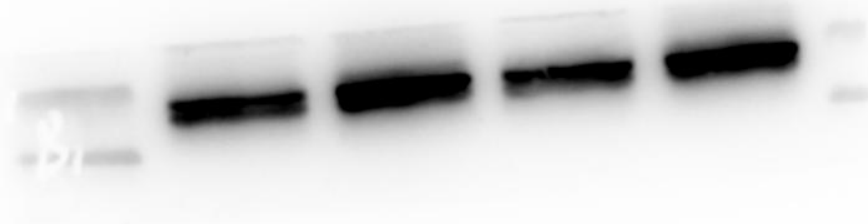

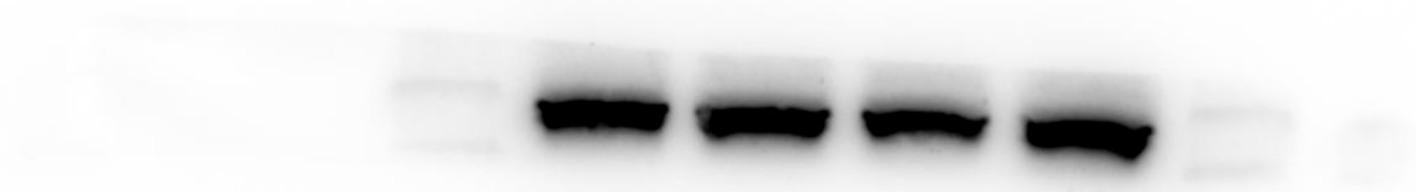

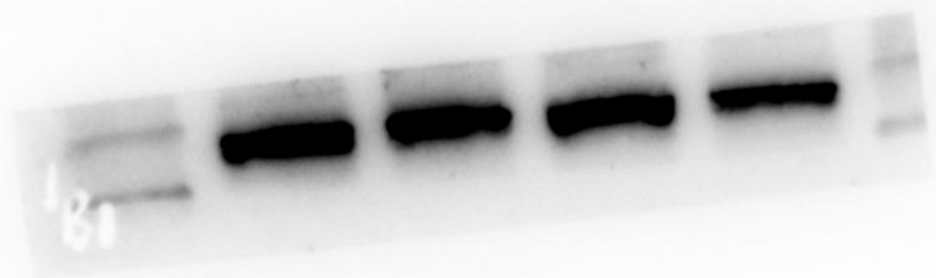

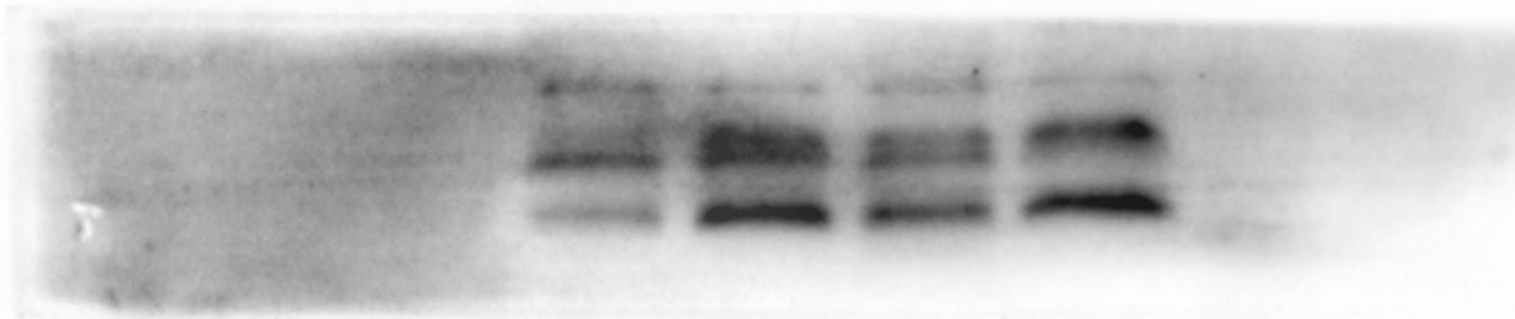

FIG5

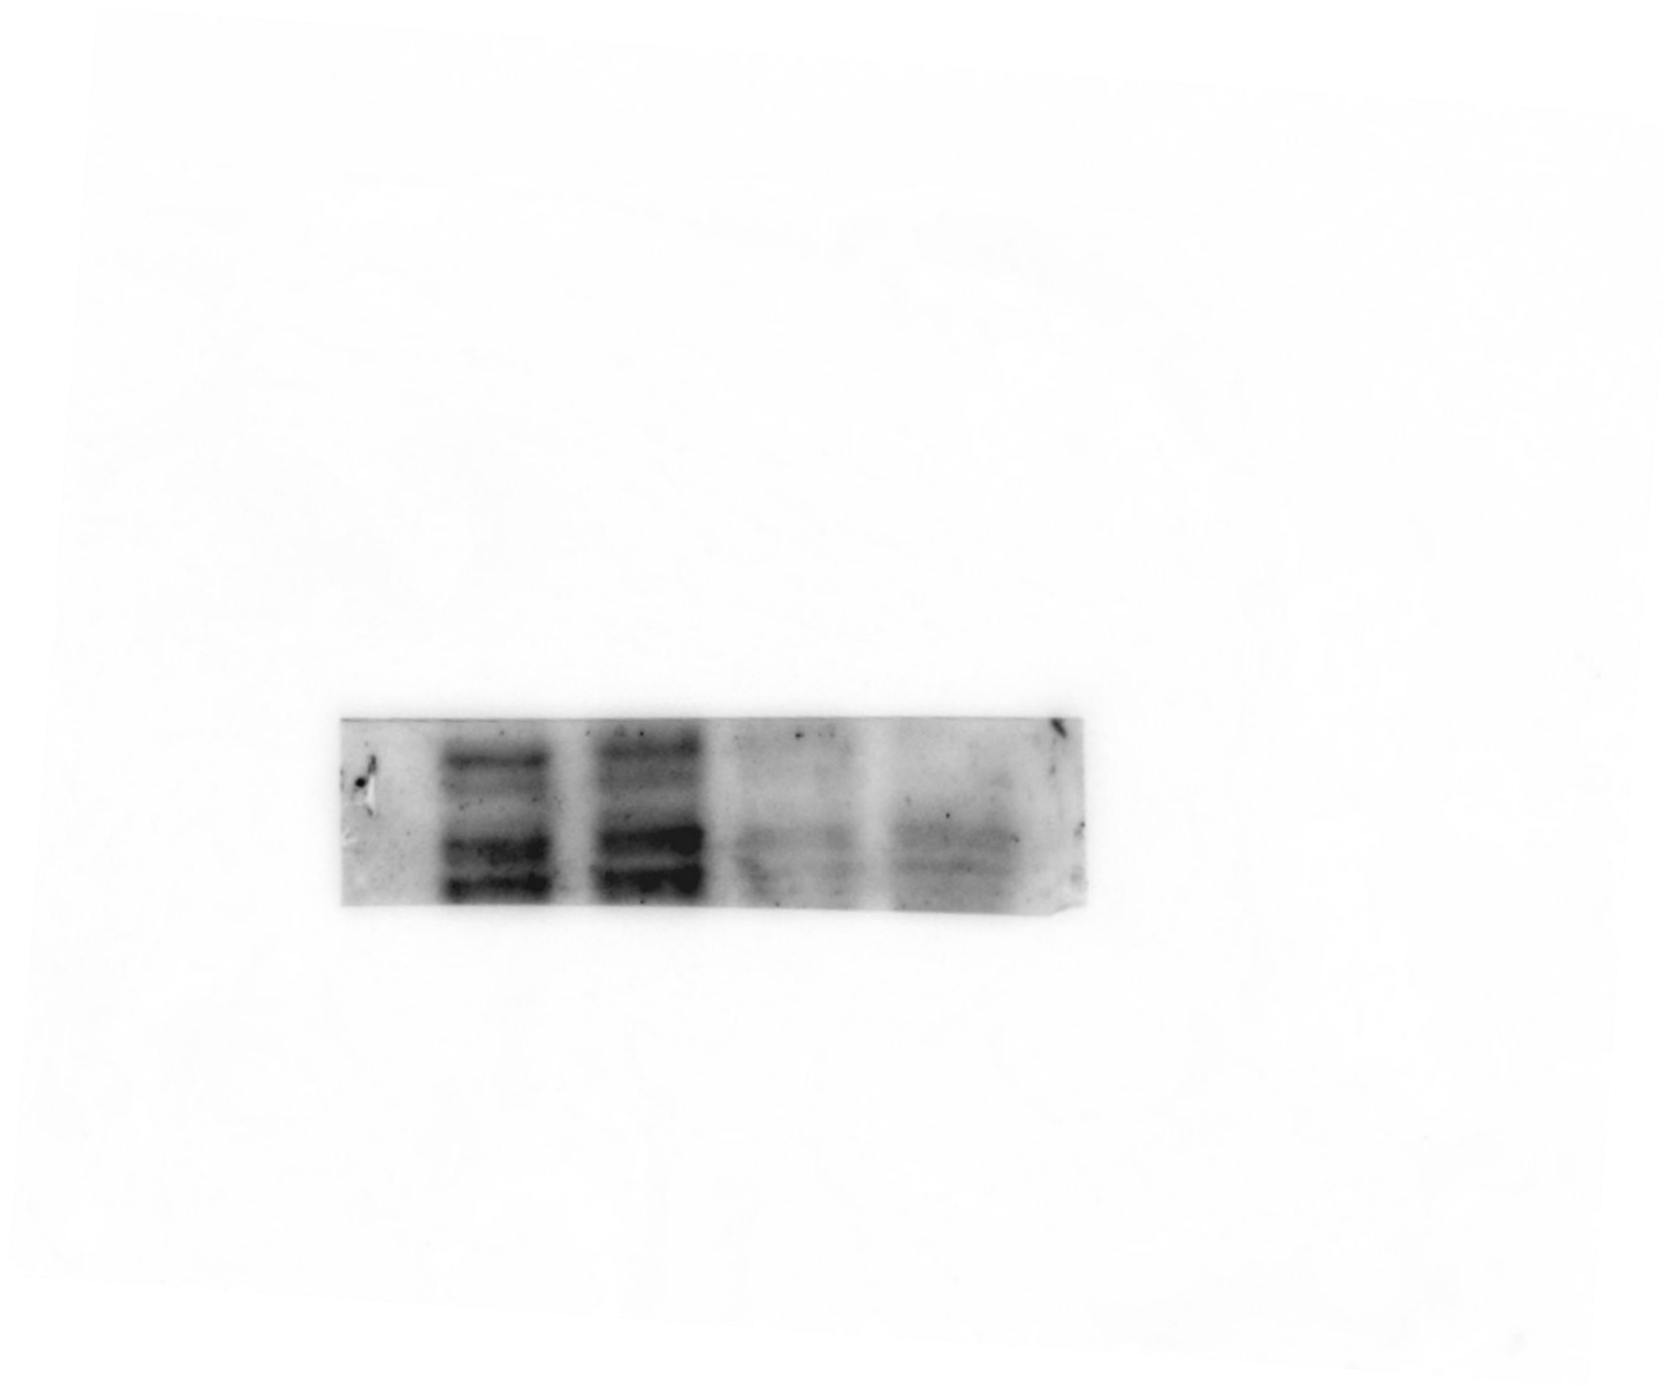

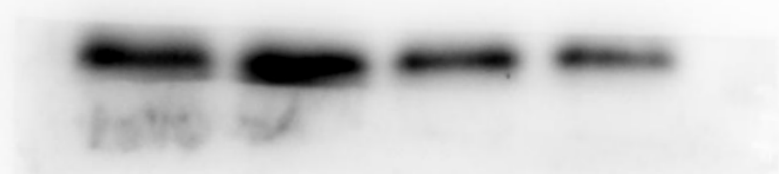

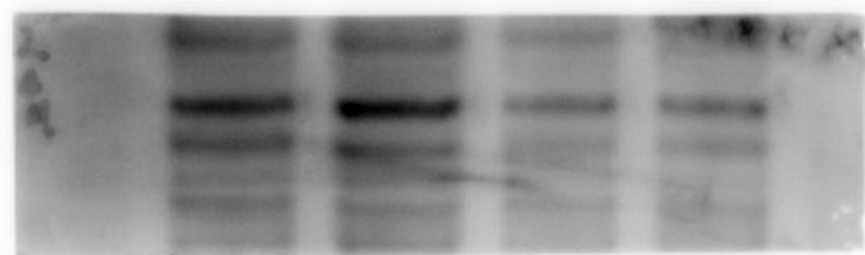



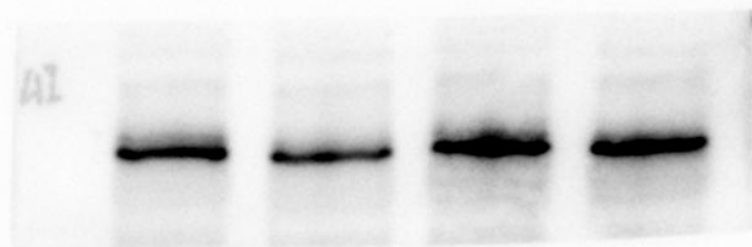

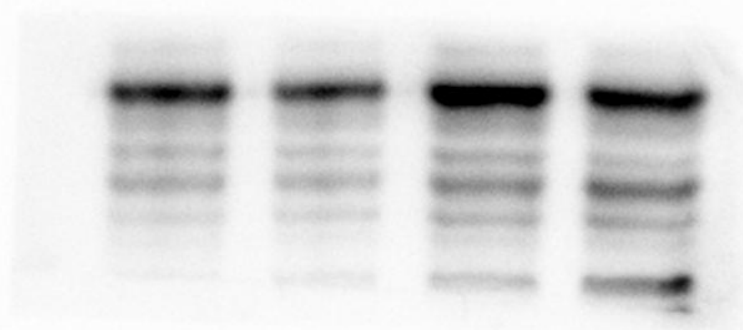

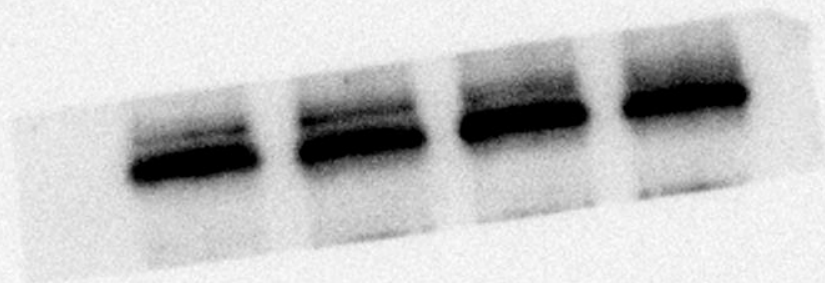

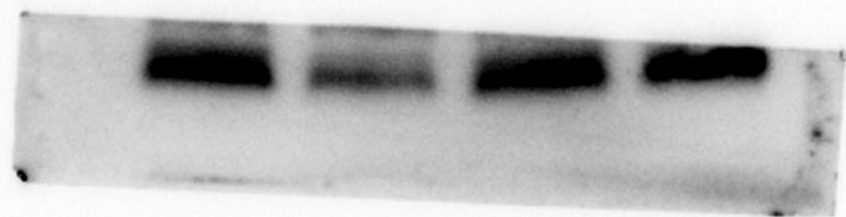

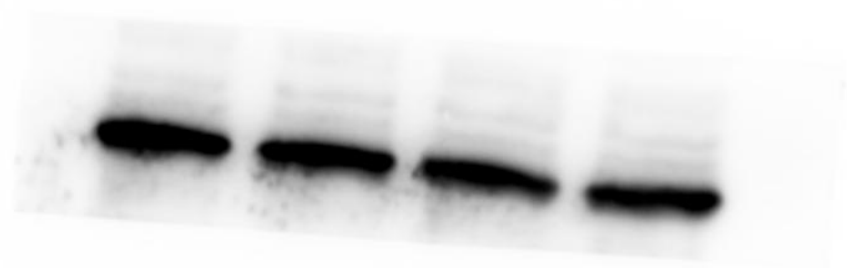

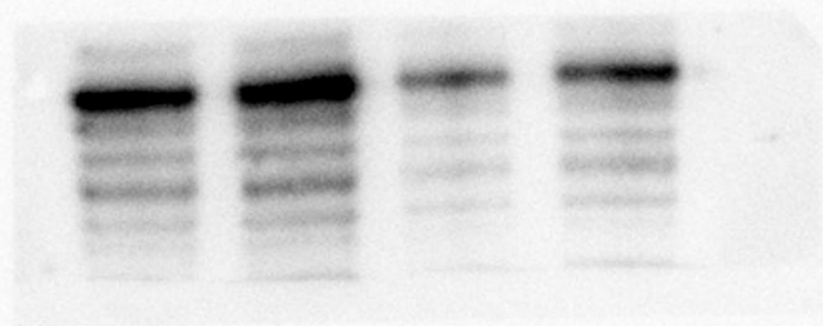

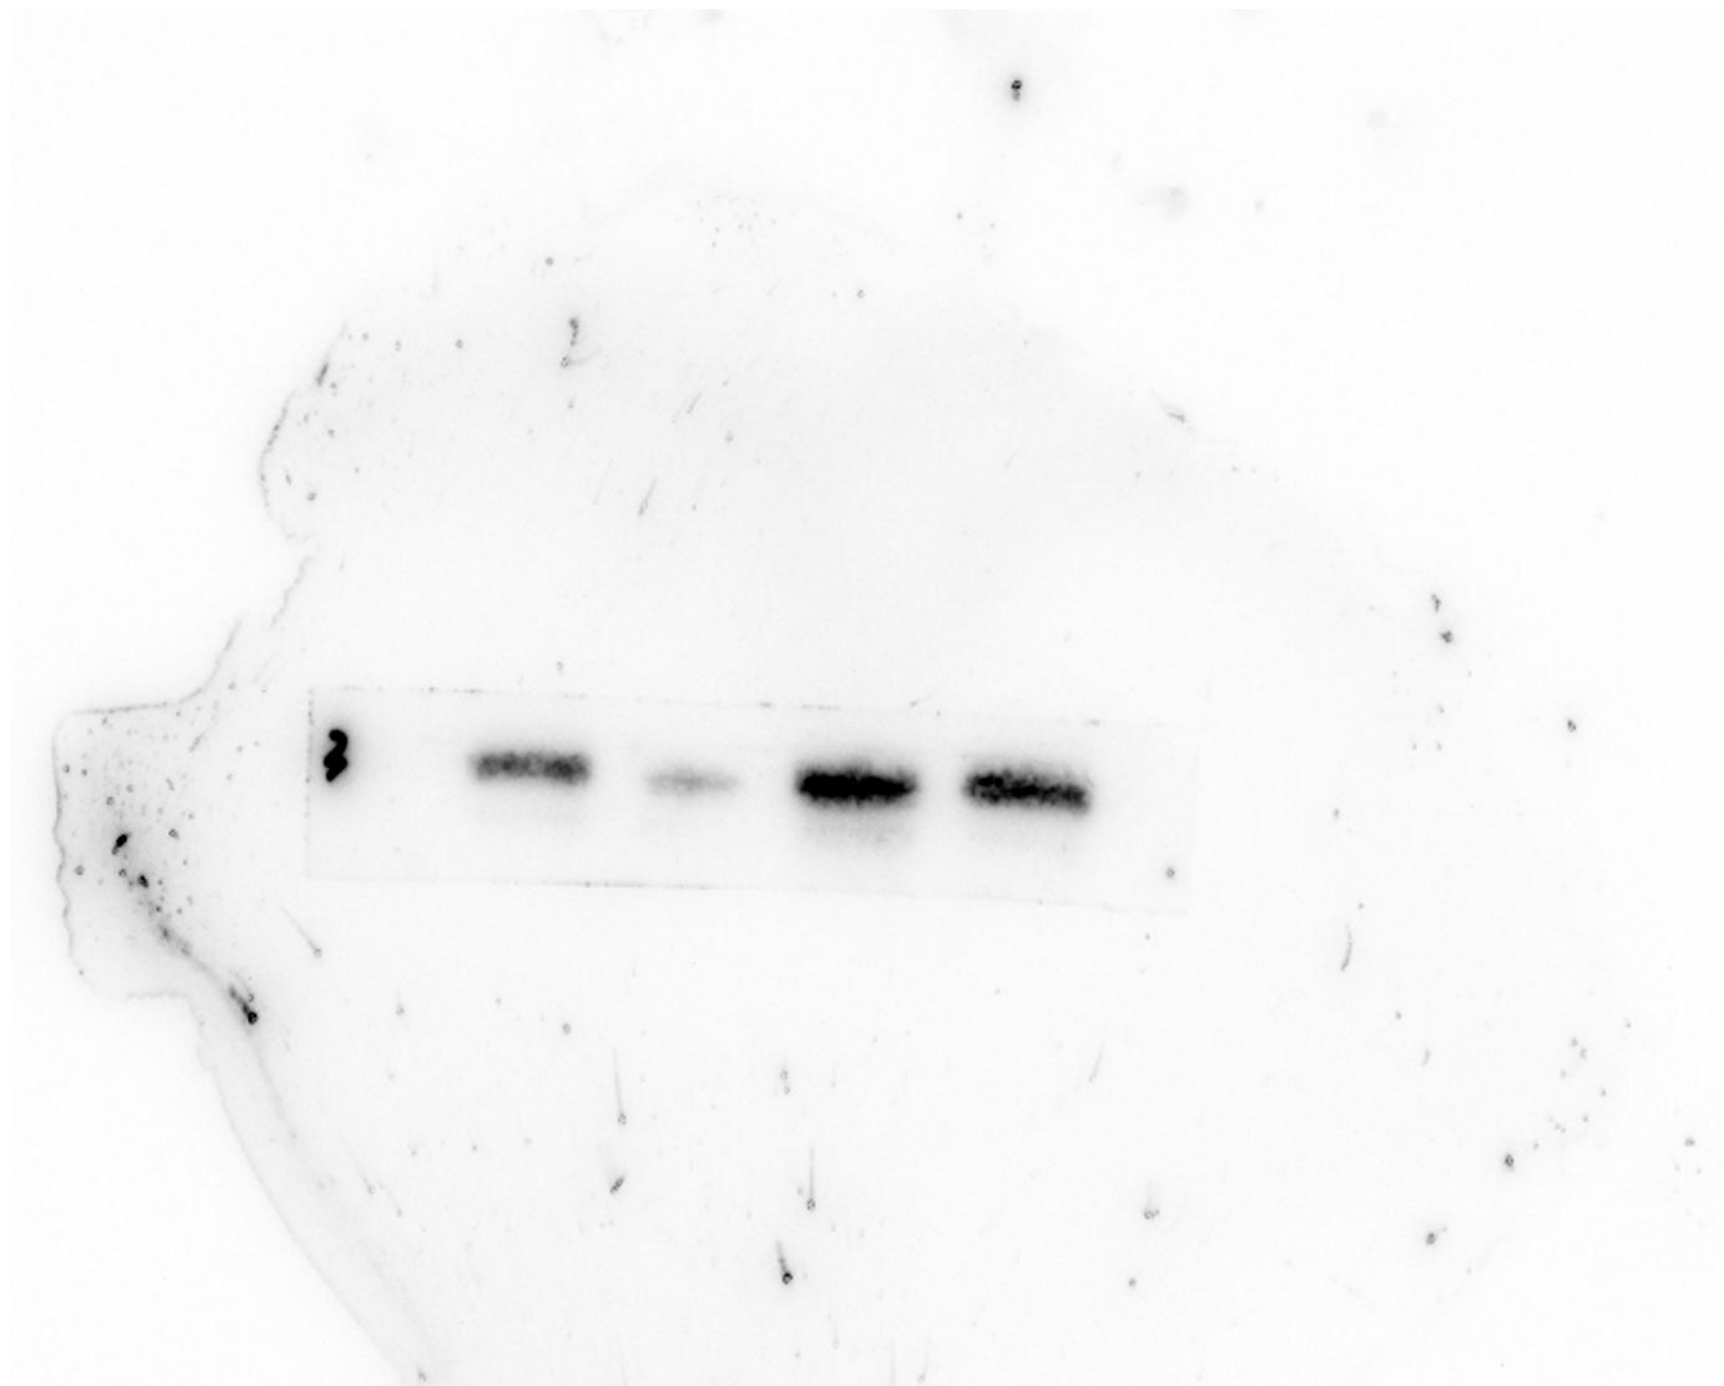

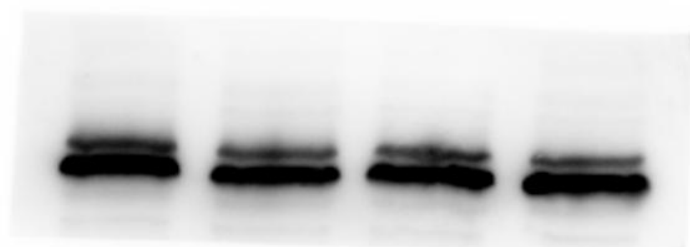



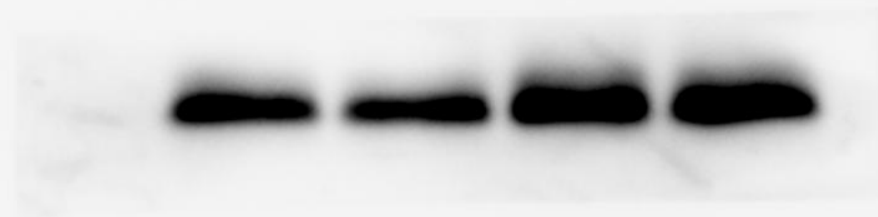

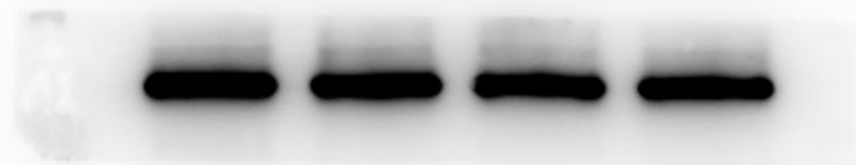

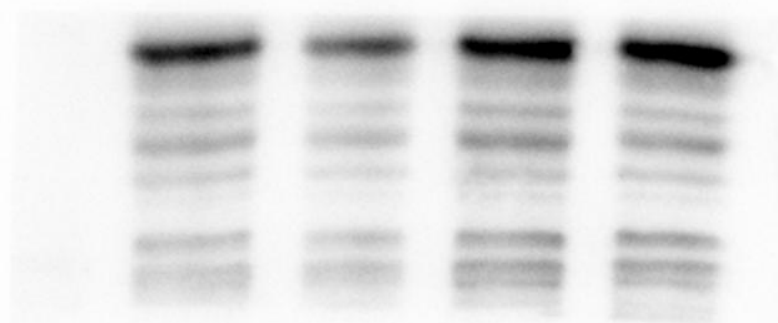

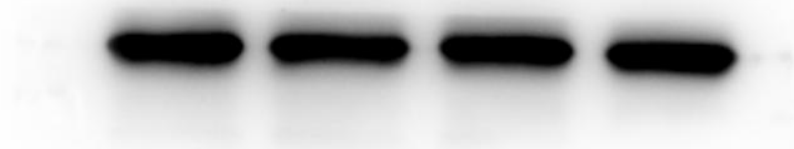

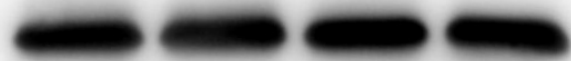

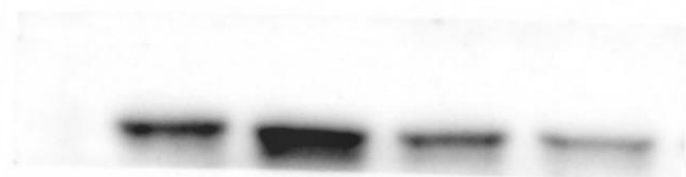

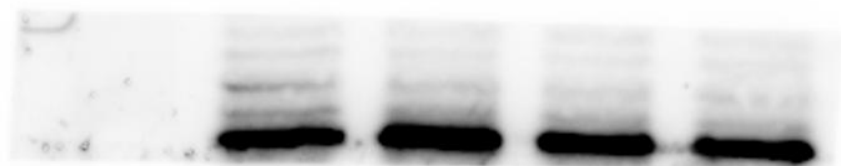

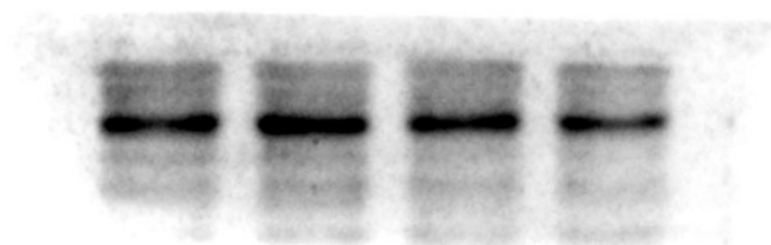



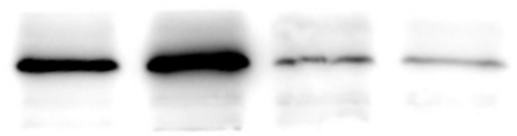

FIG6

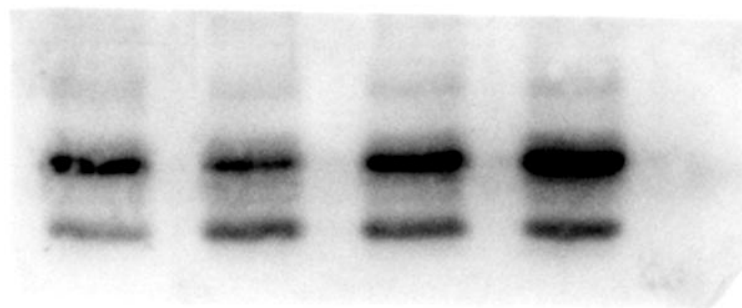

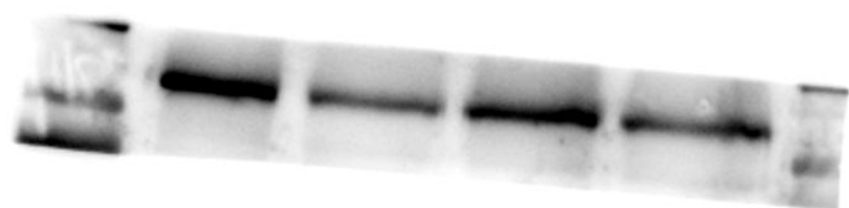

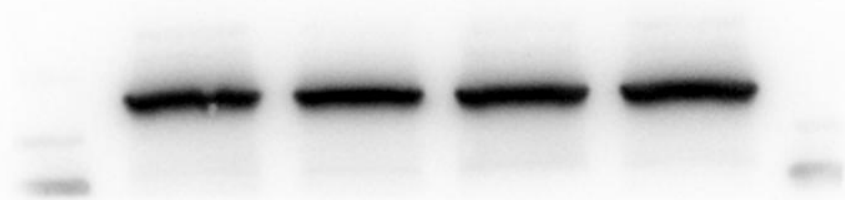

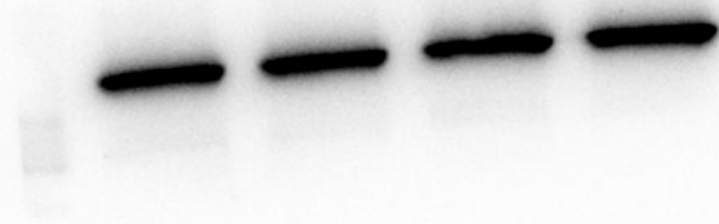

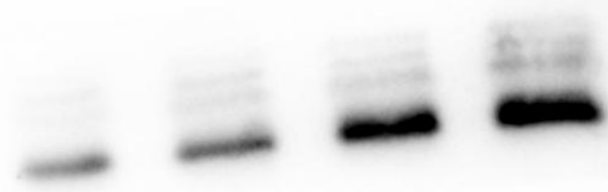

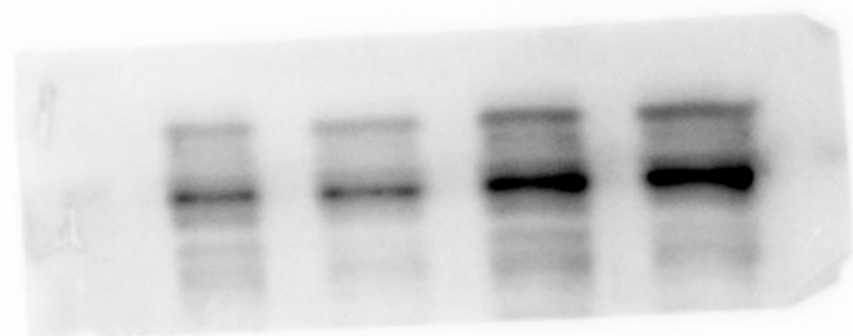

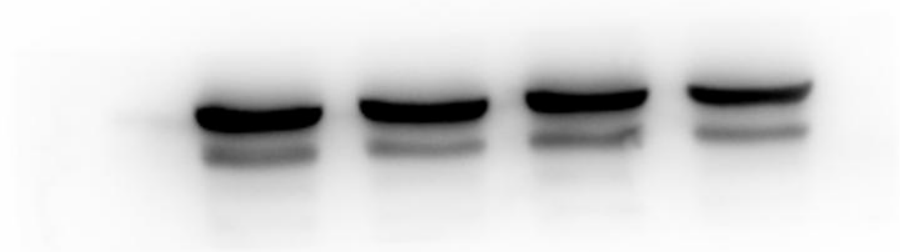



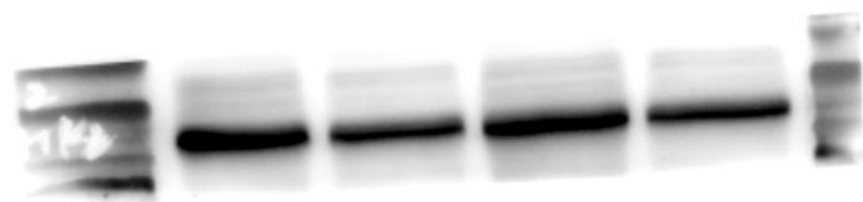

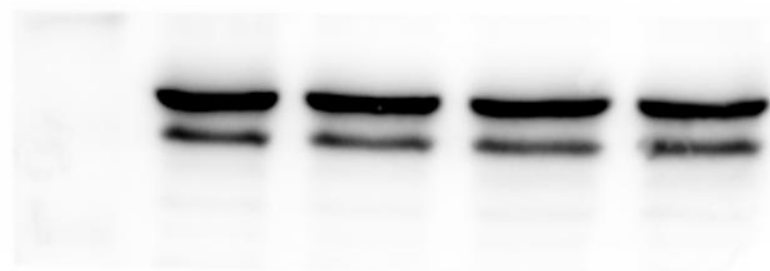

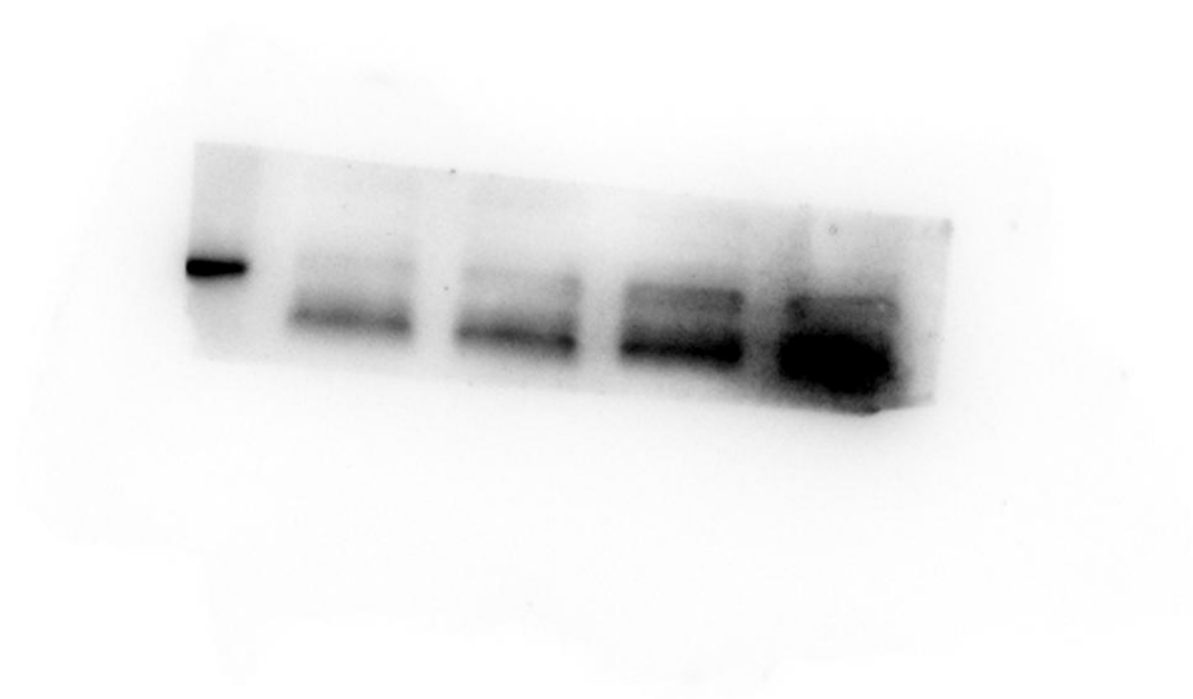

S, FIG1

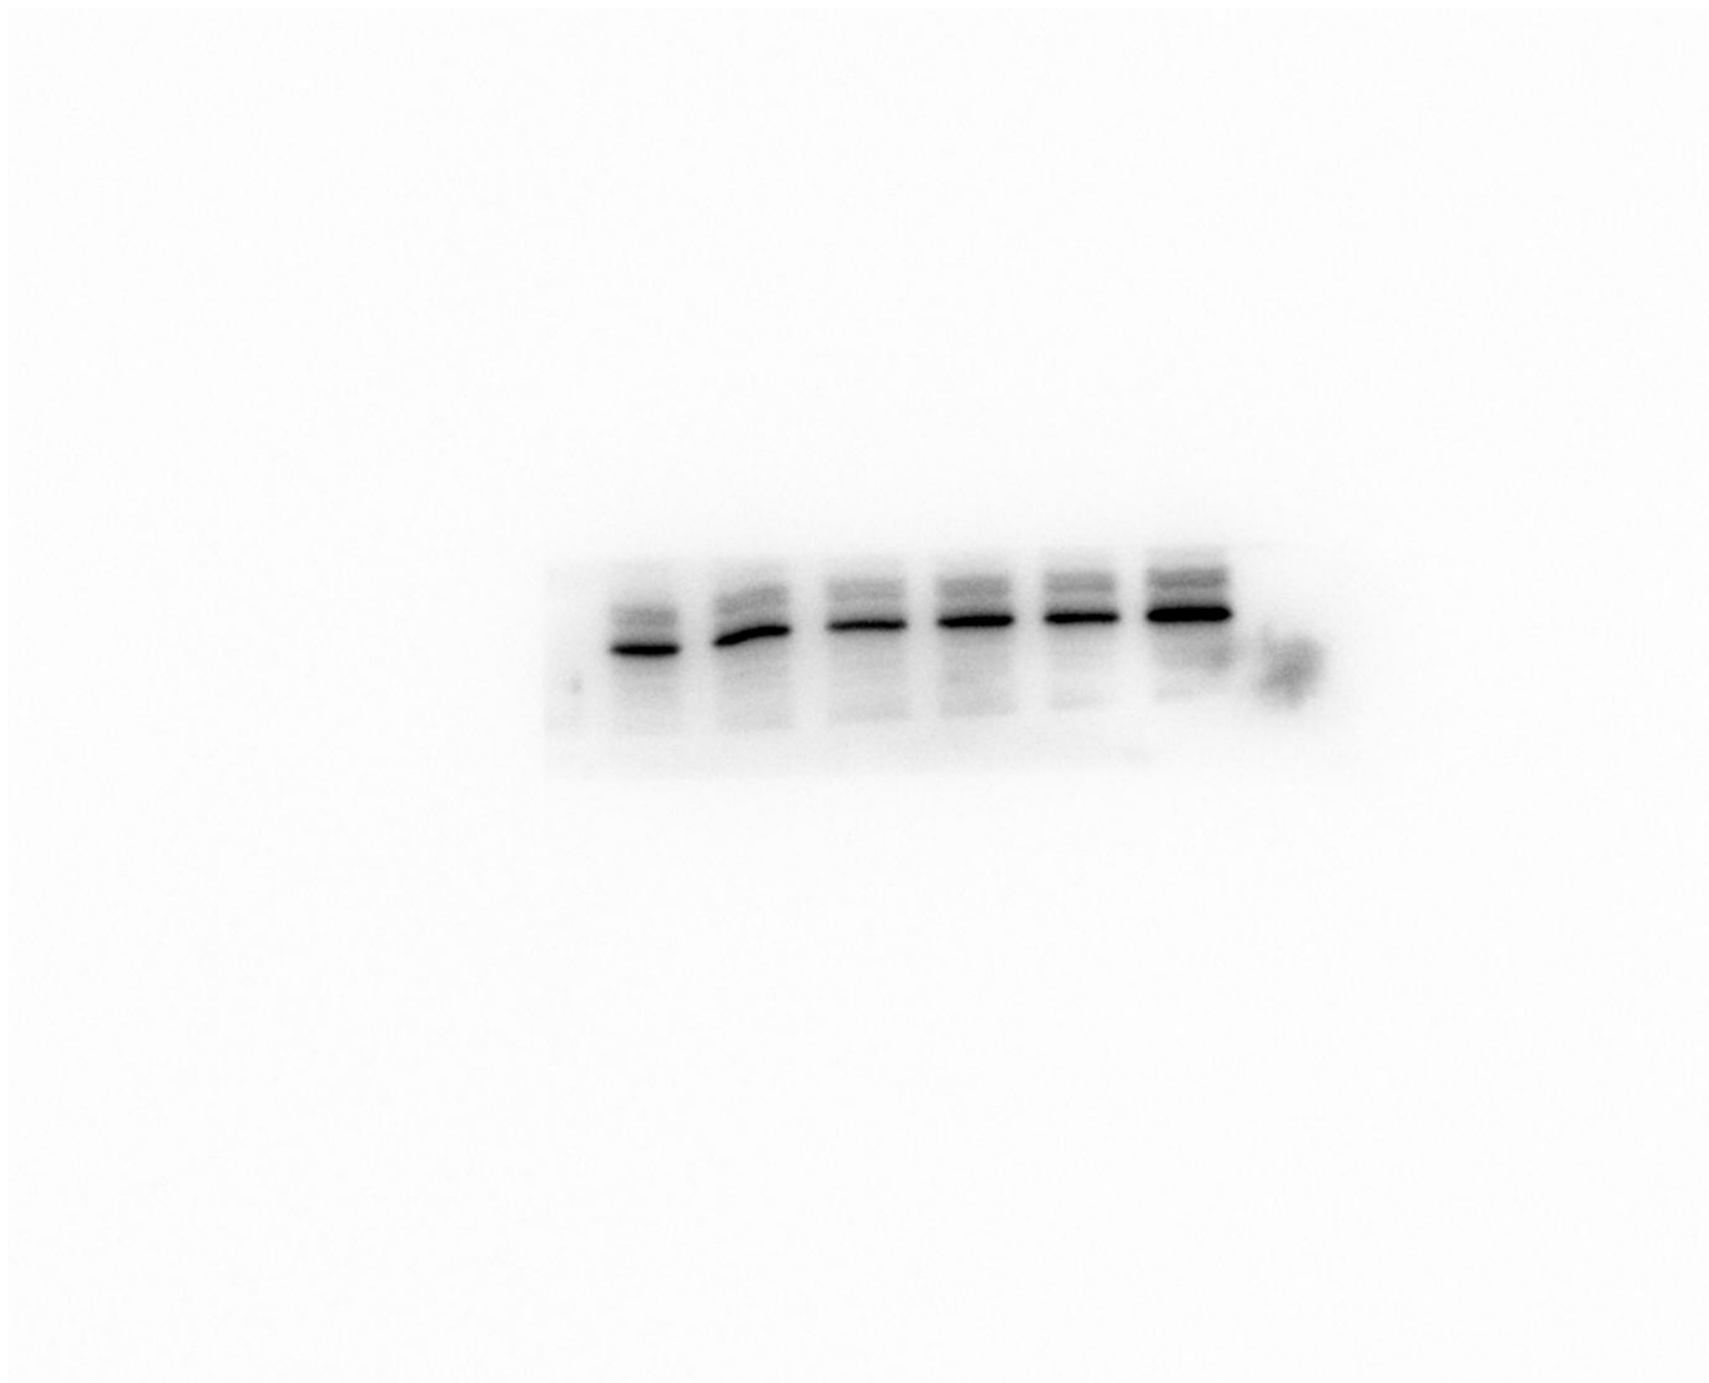

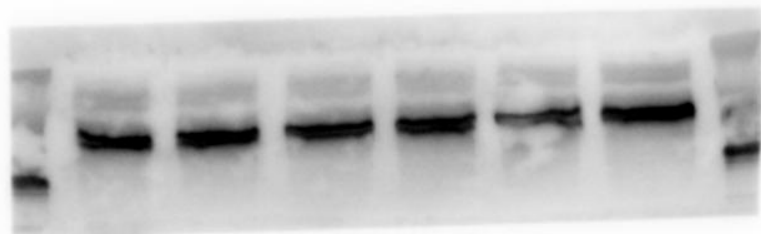

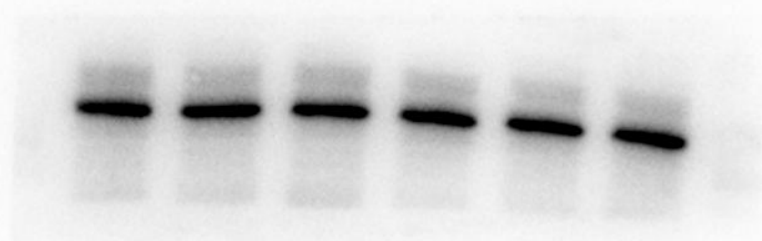

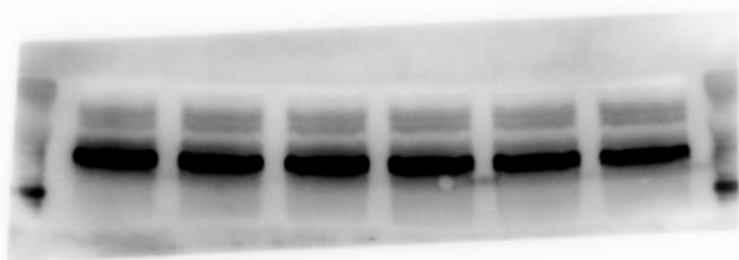

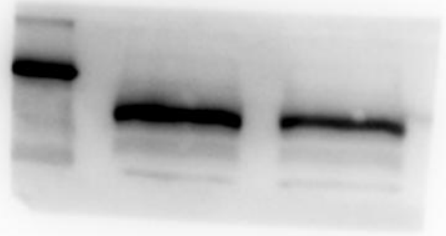



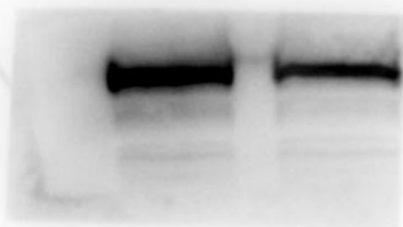

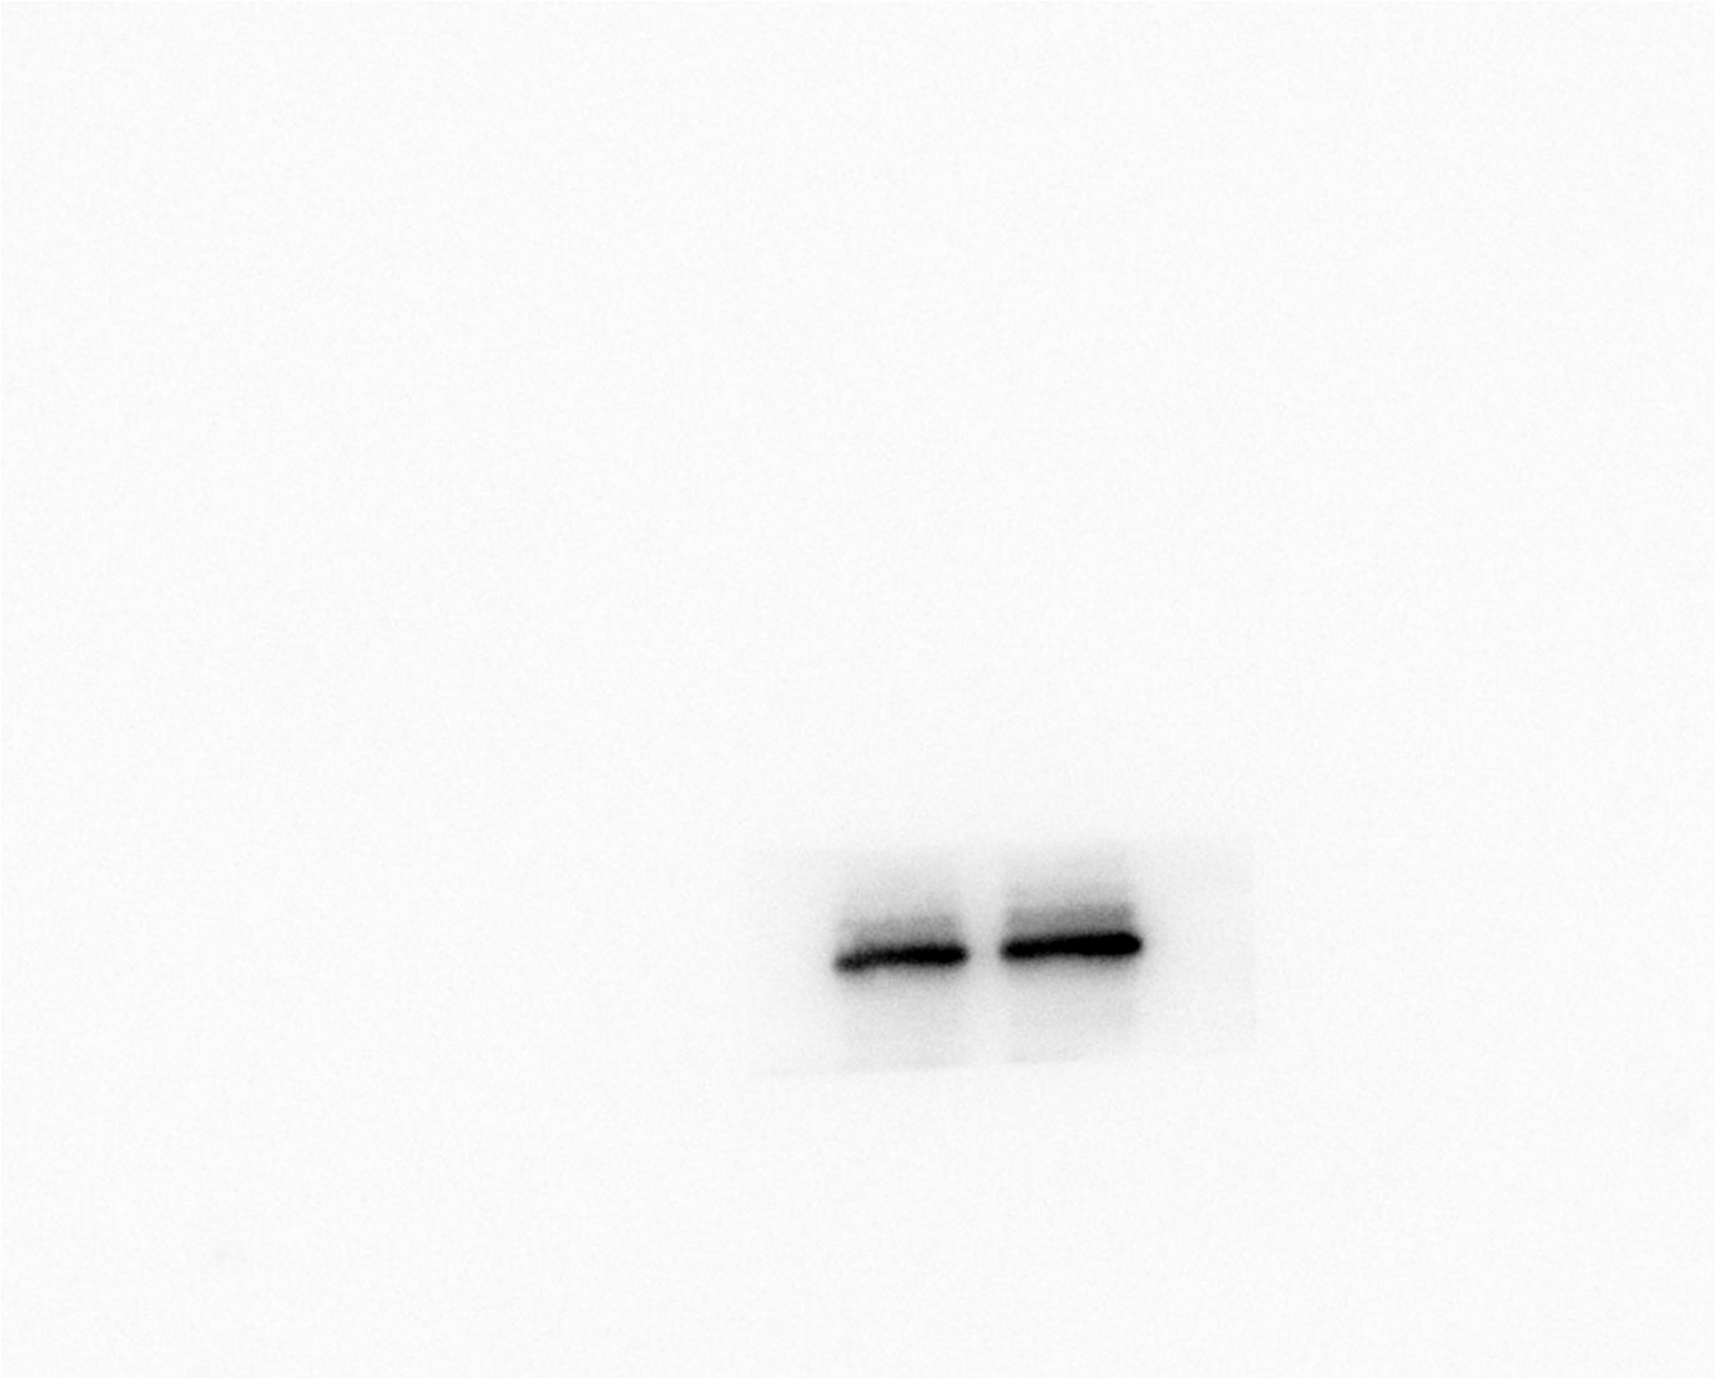

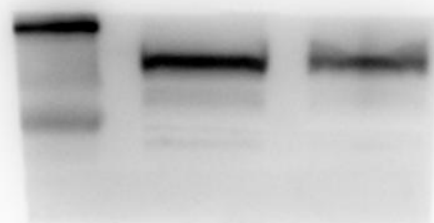

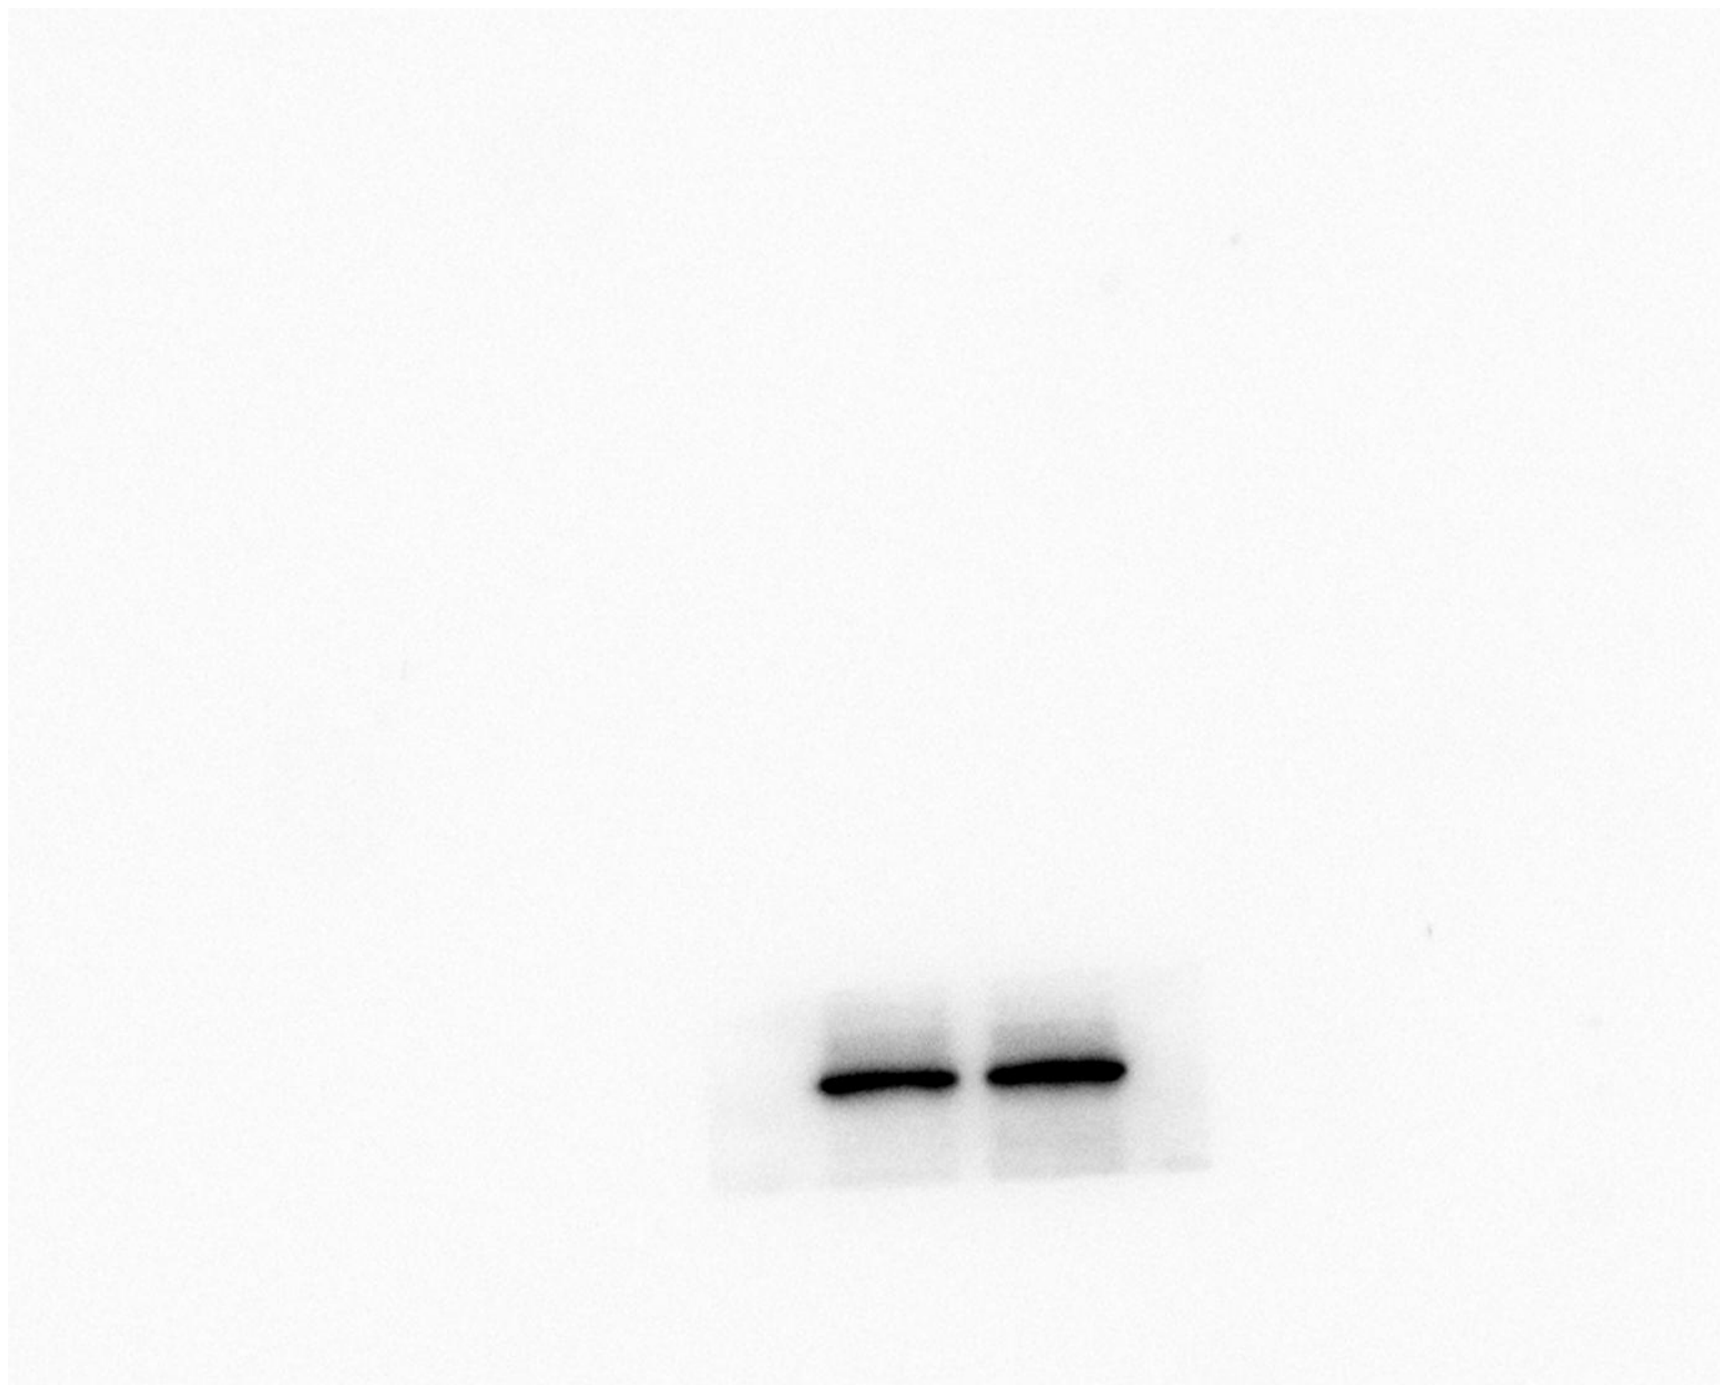

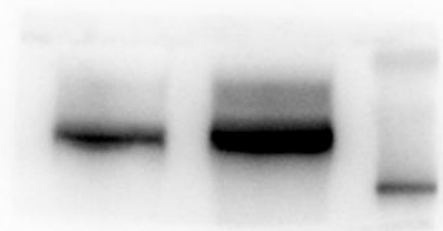

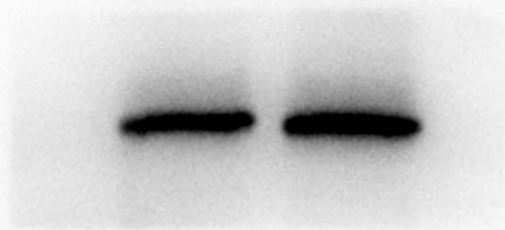

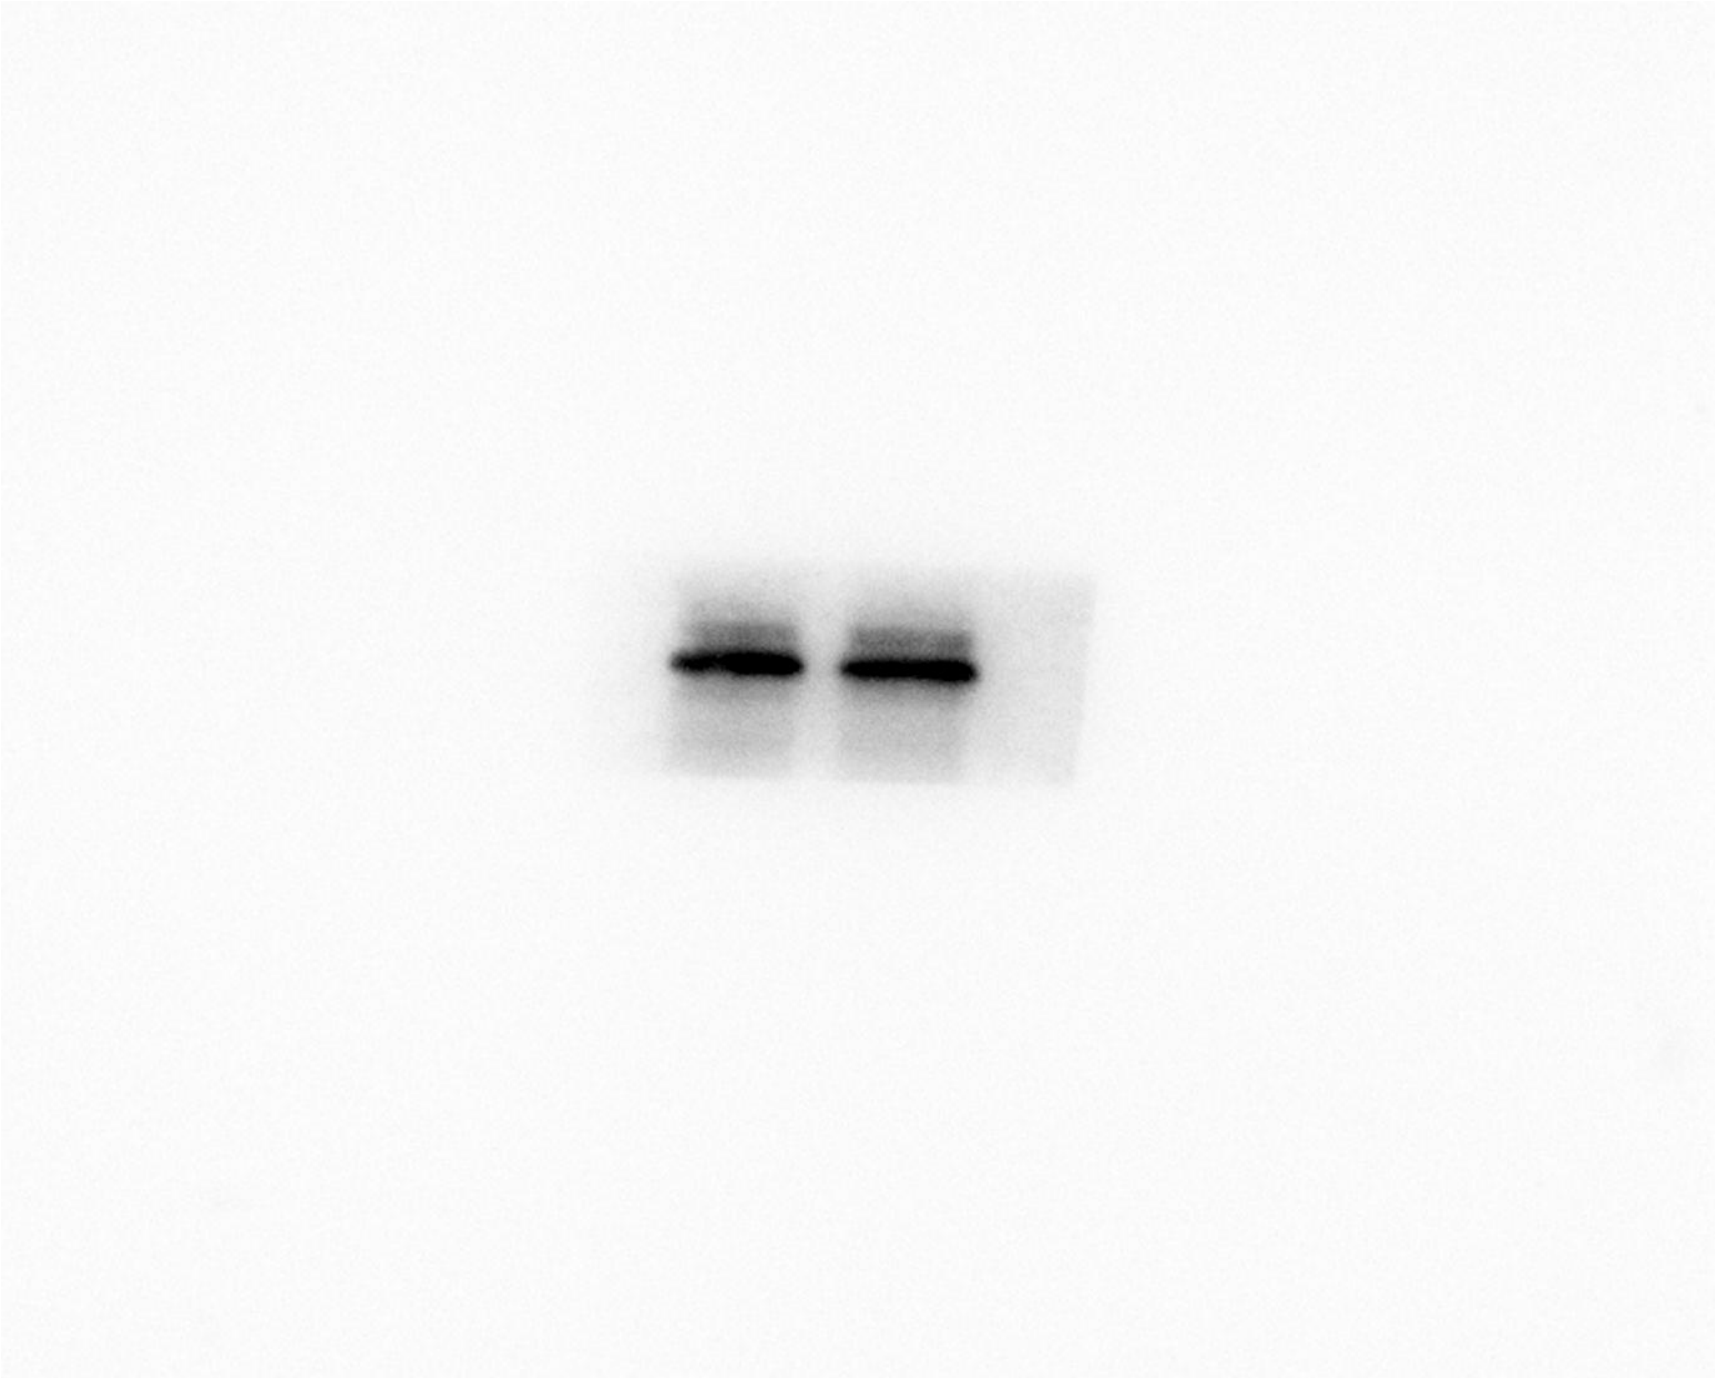

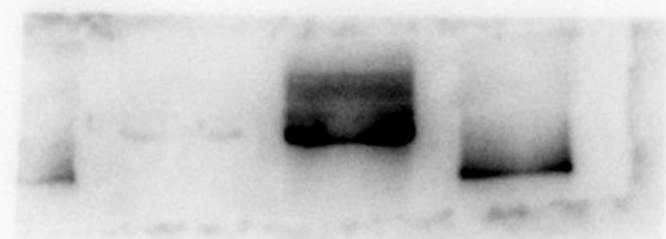



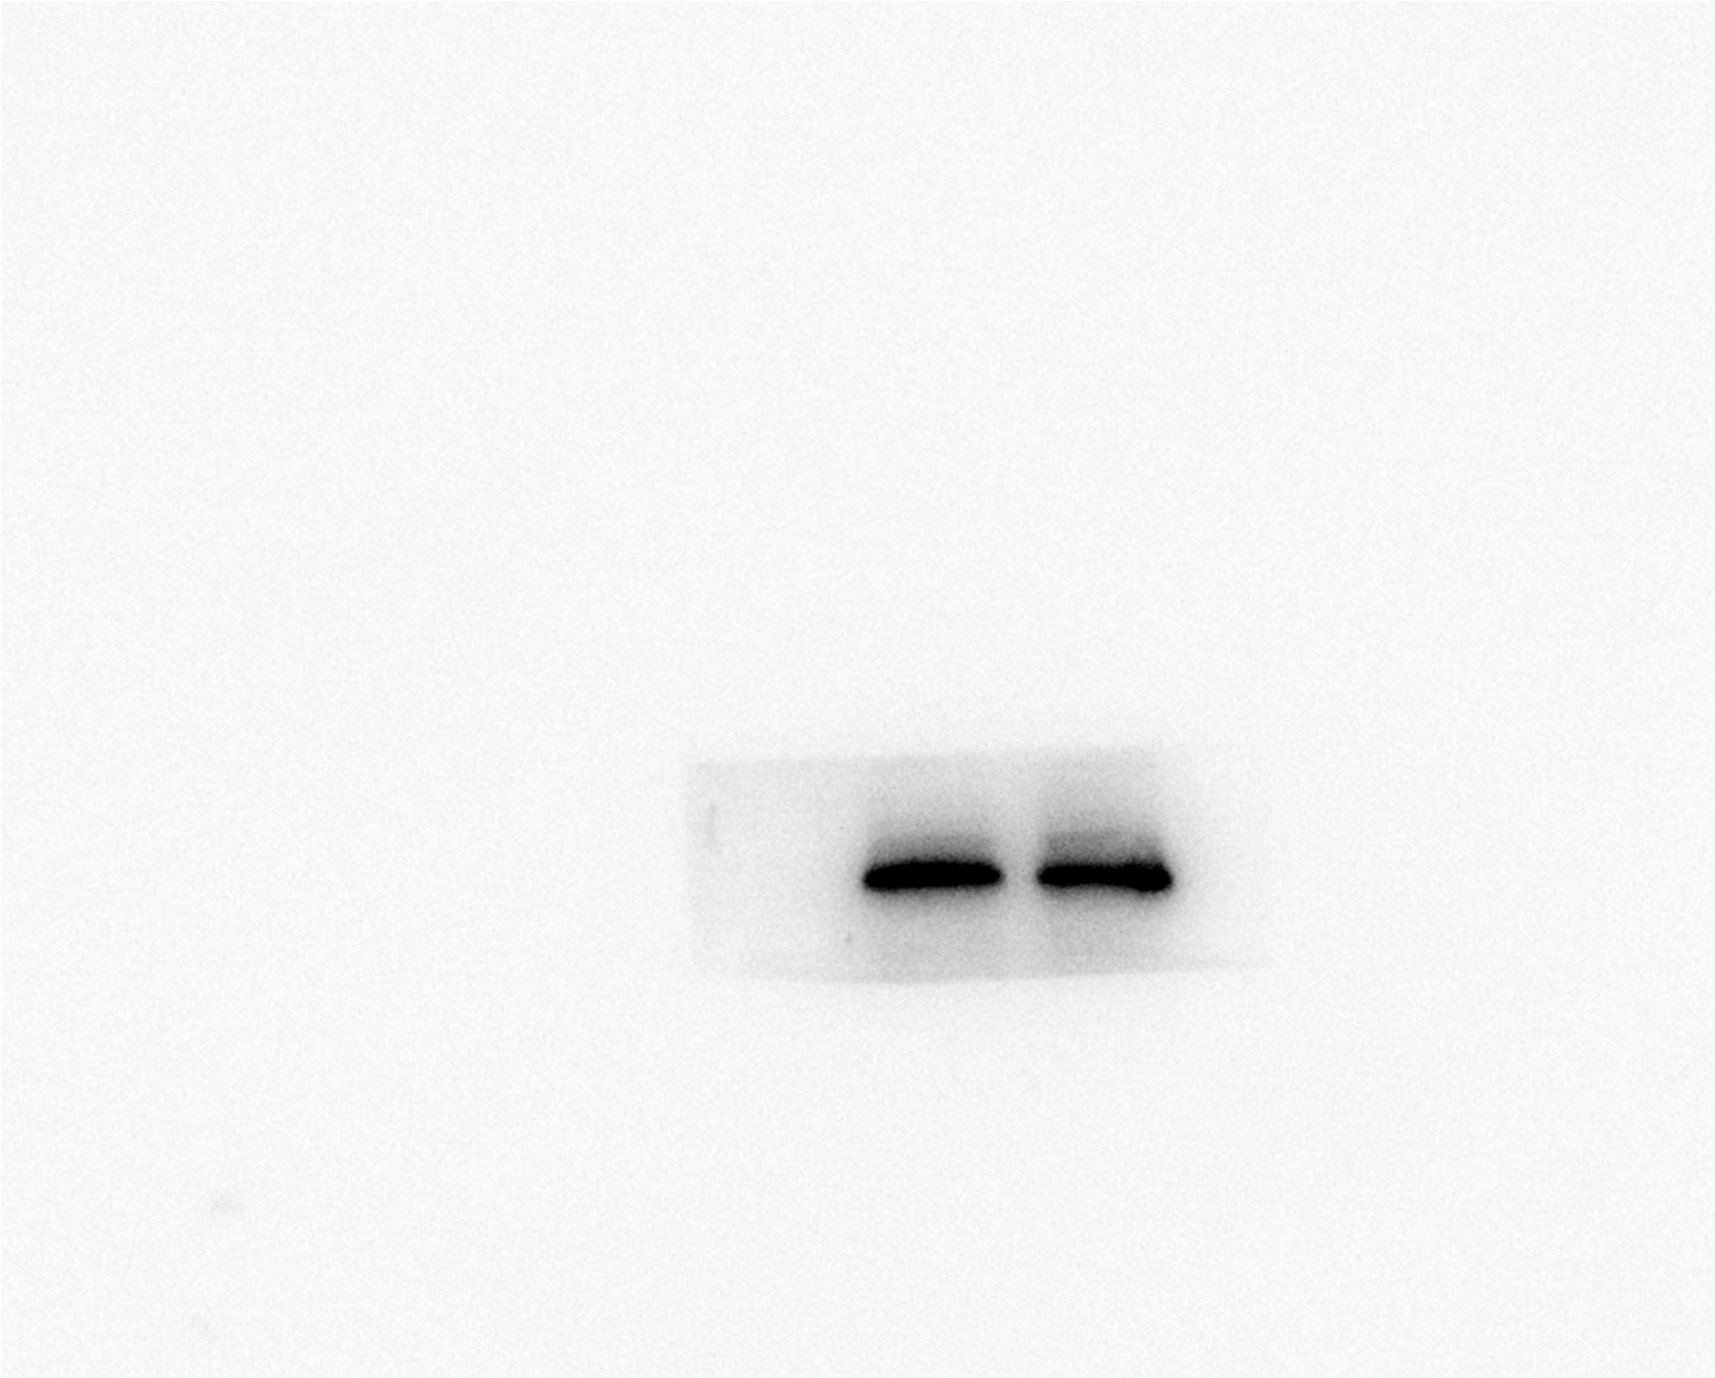

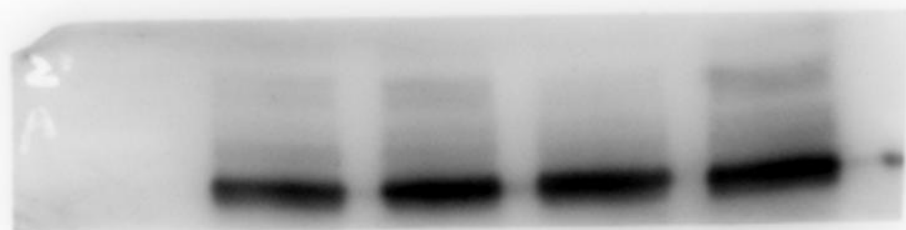

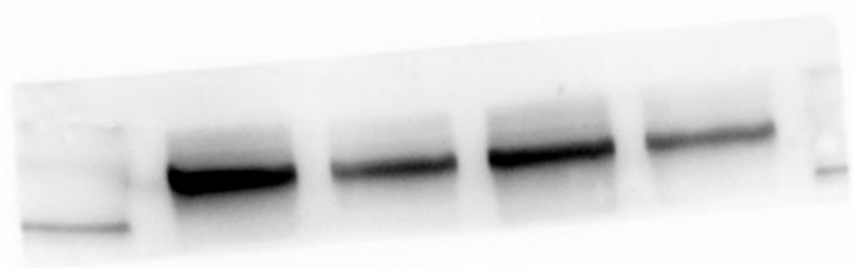

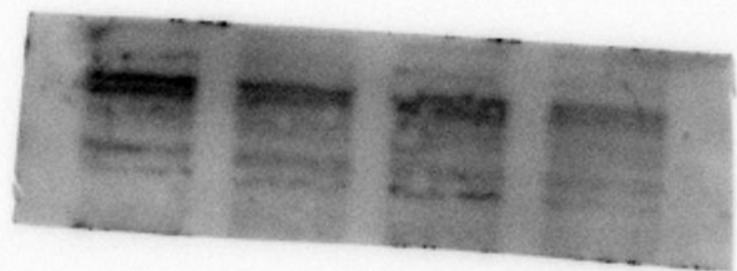

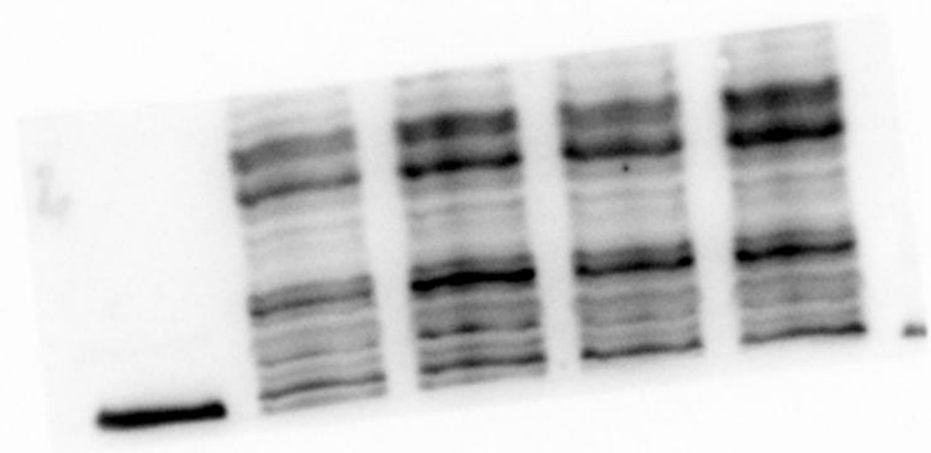

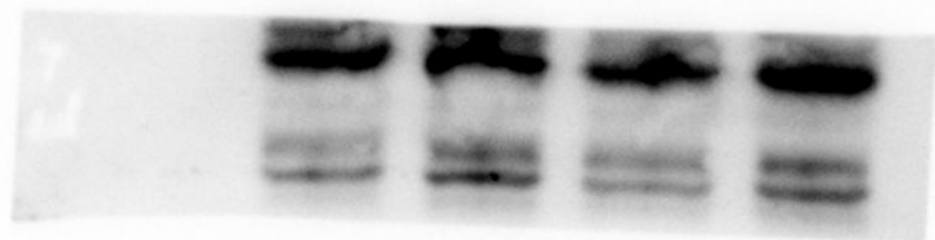

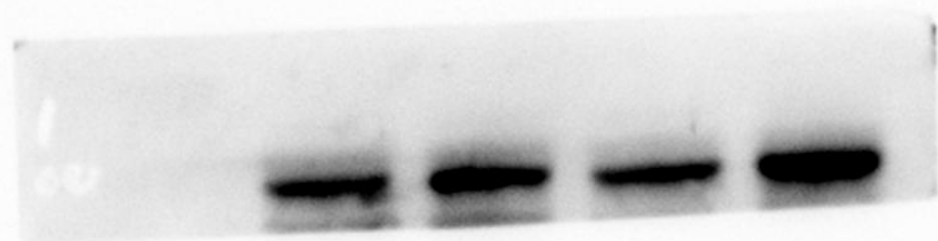

S.FIG3

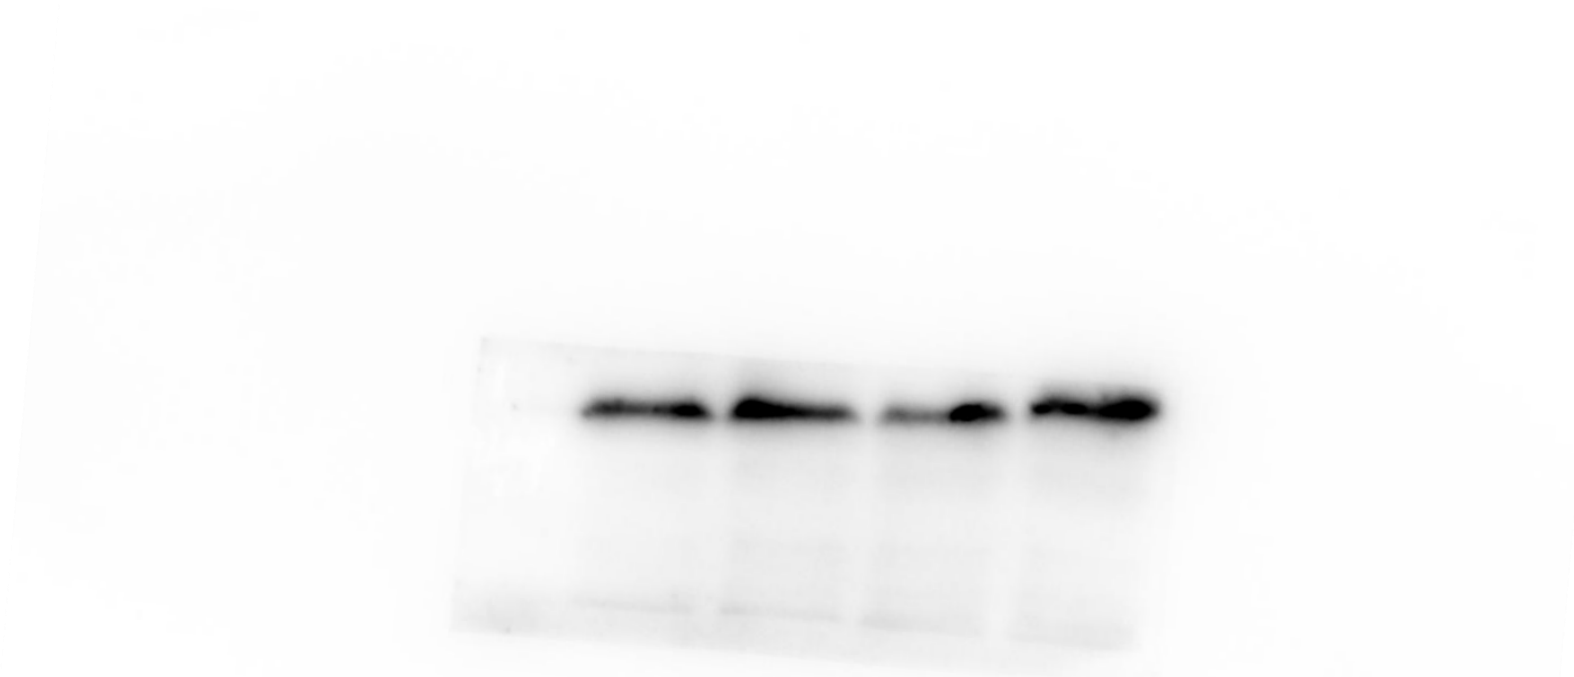



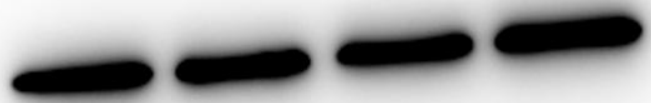

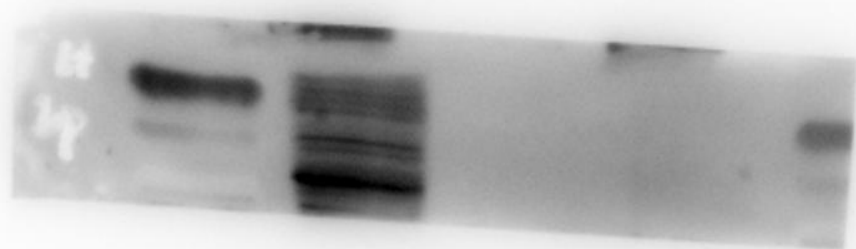

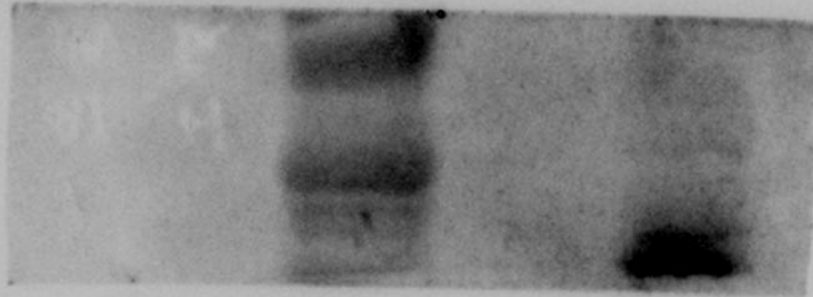

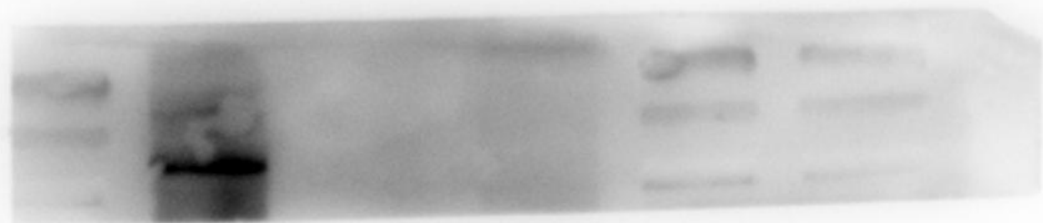

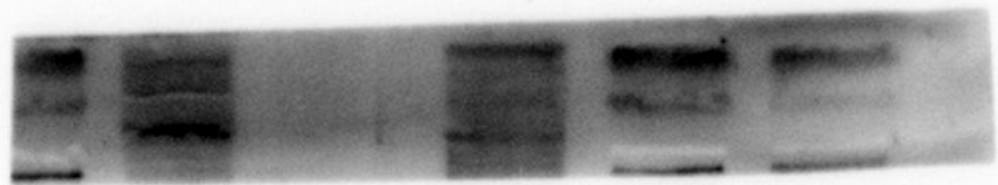

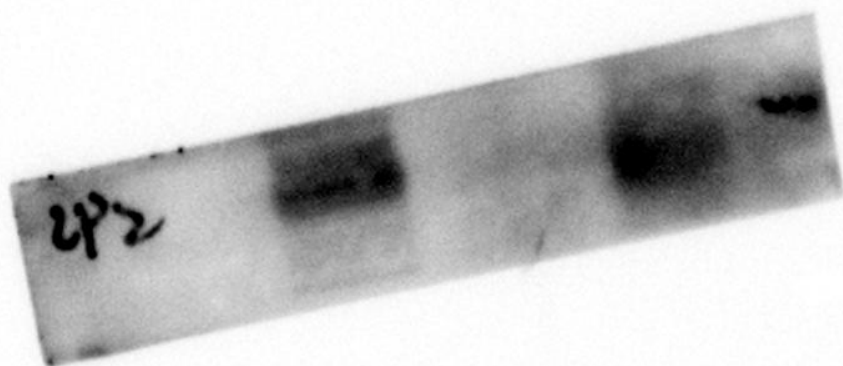

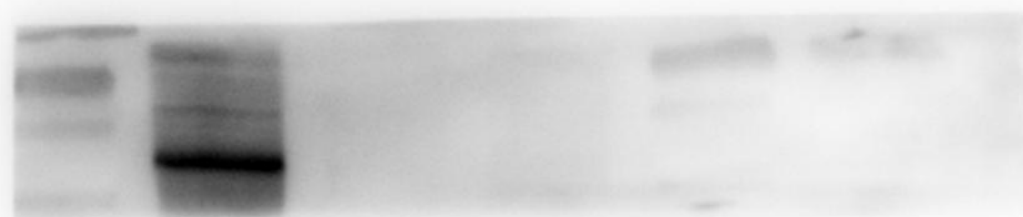

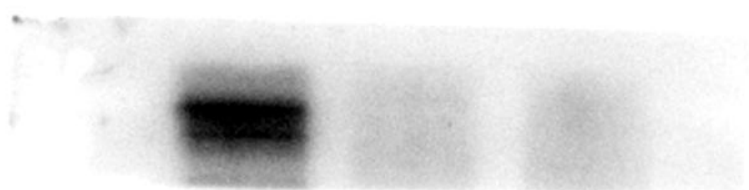



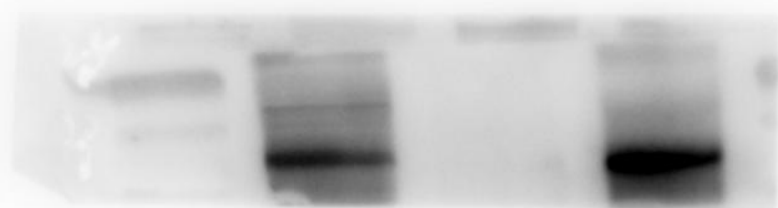

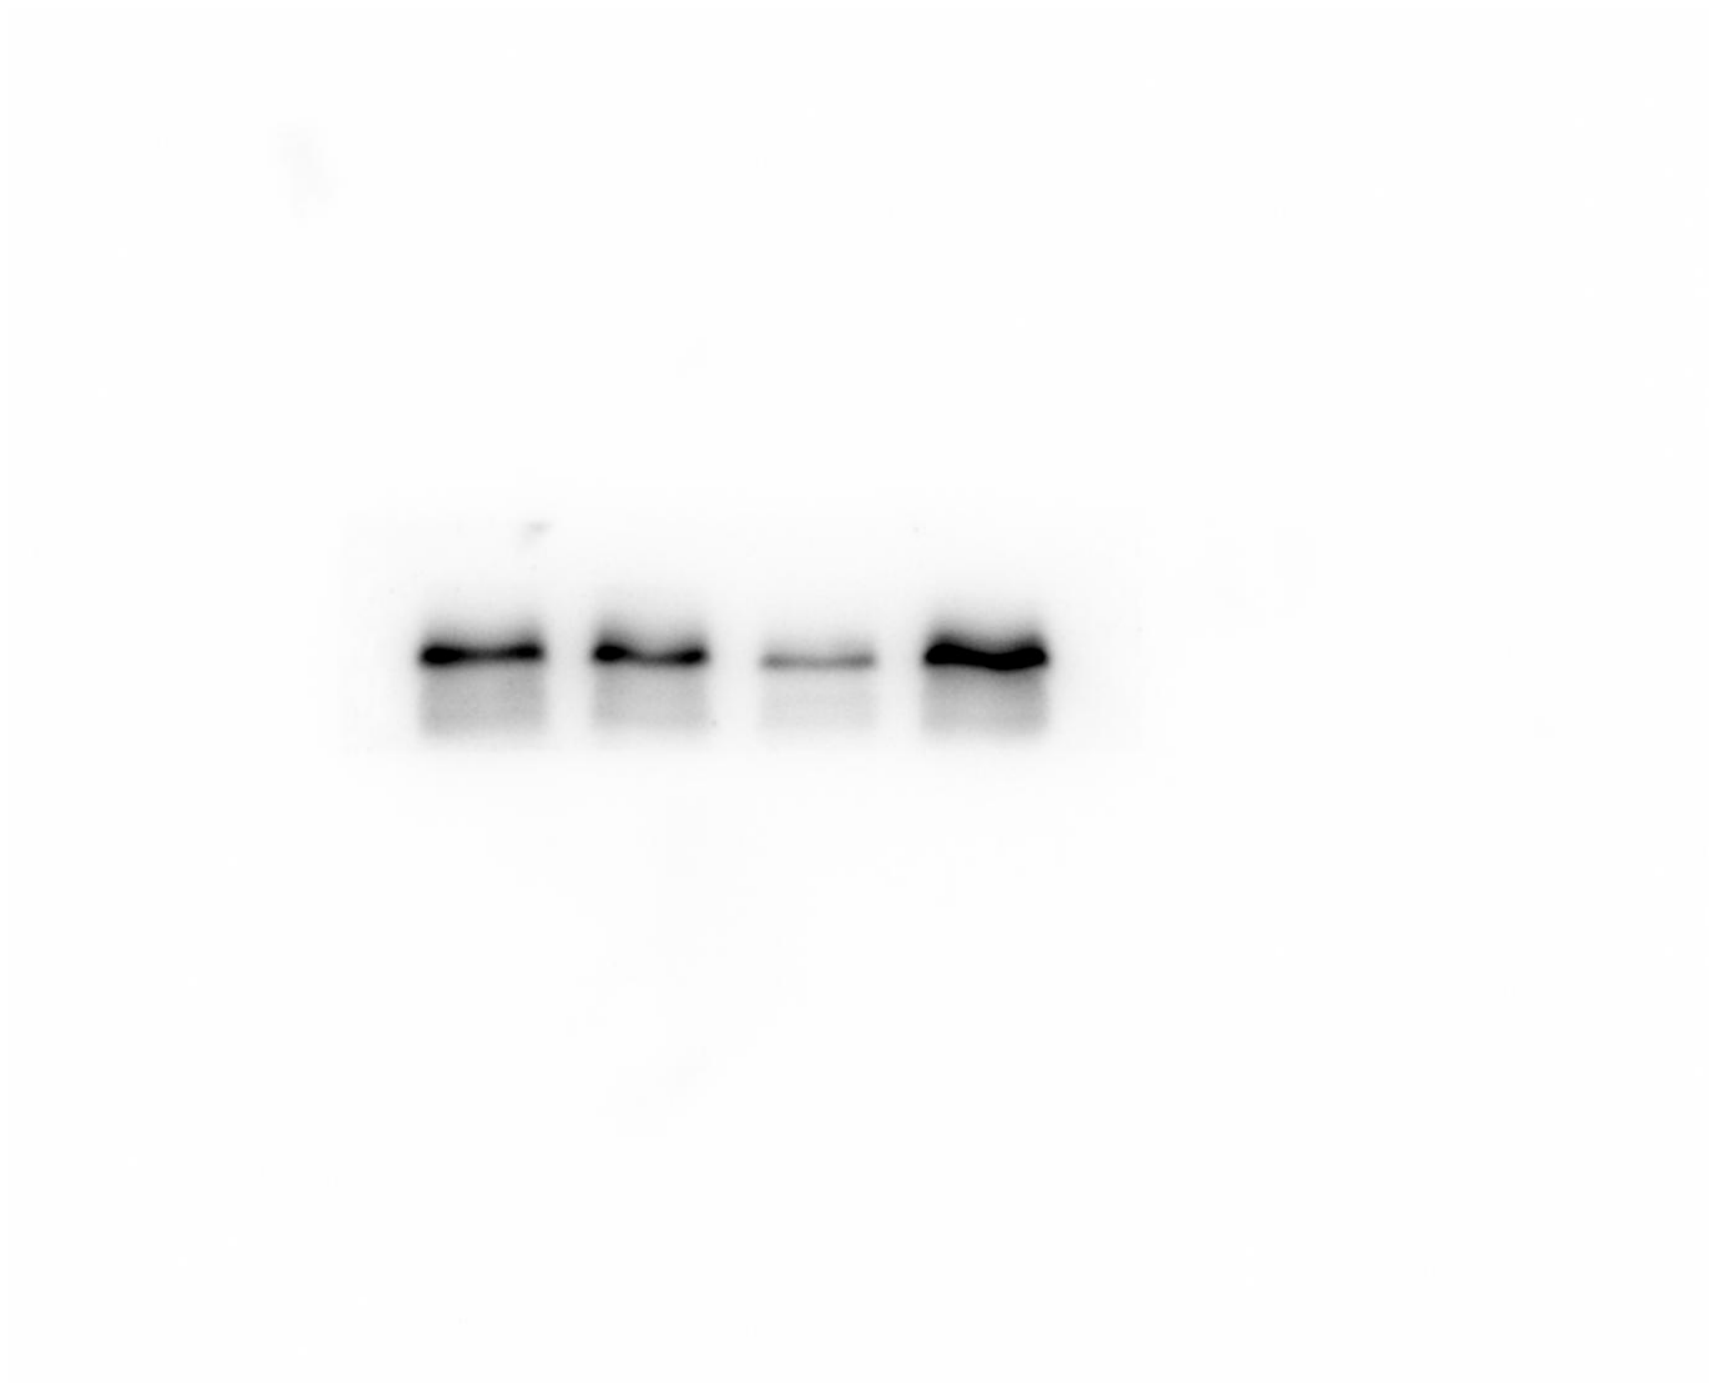

— — — —

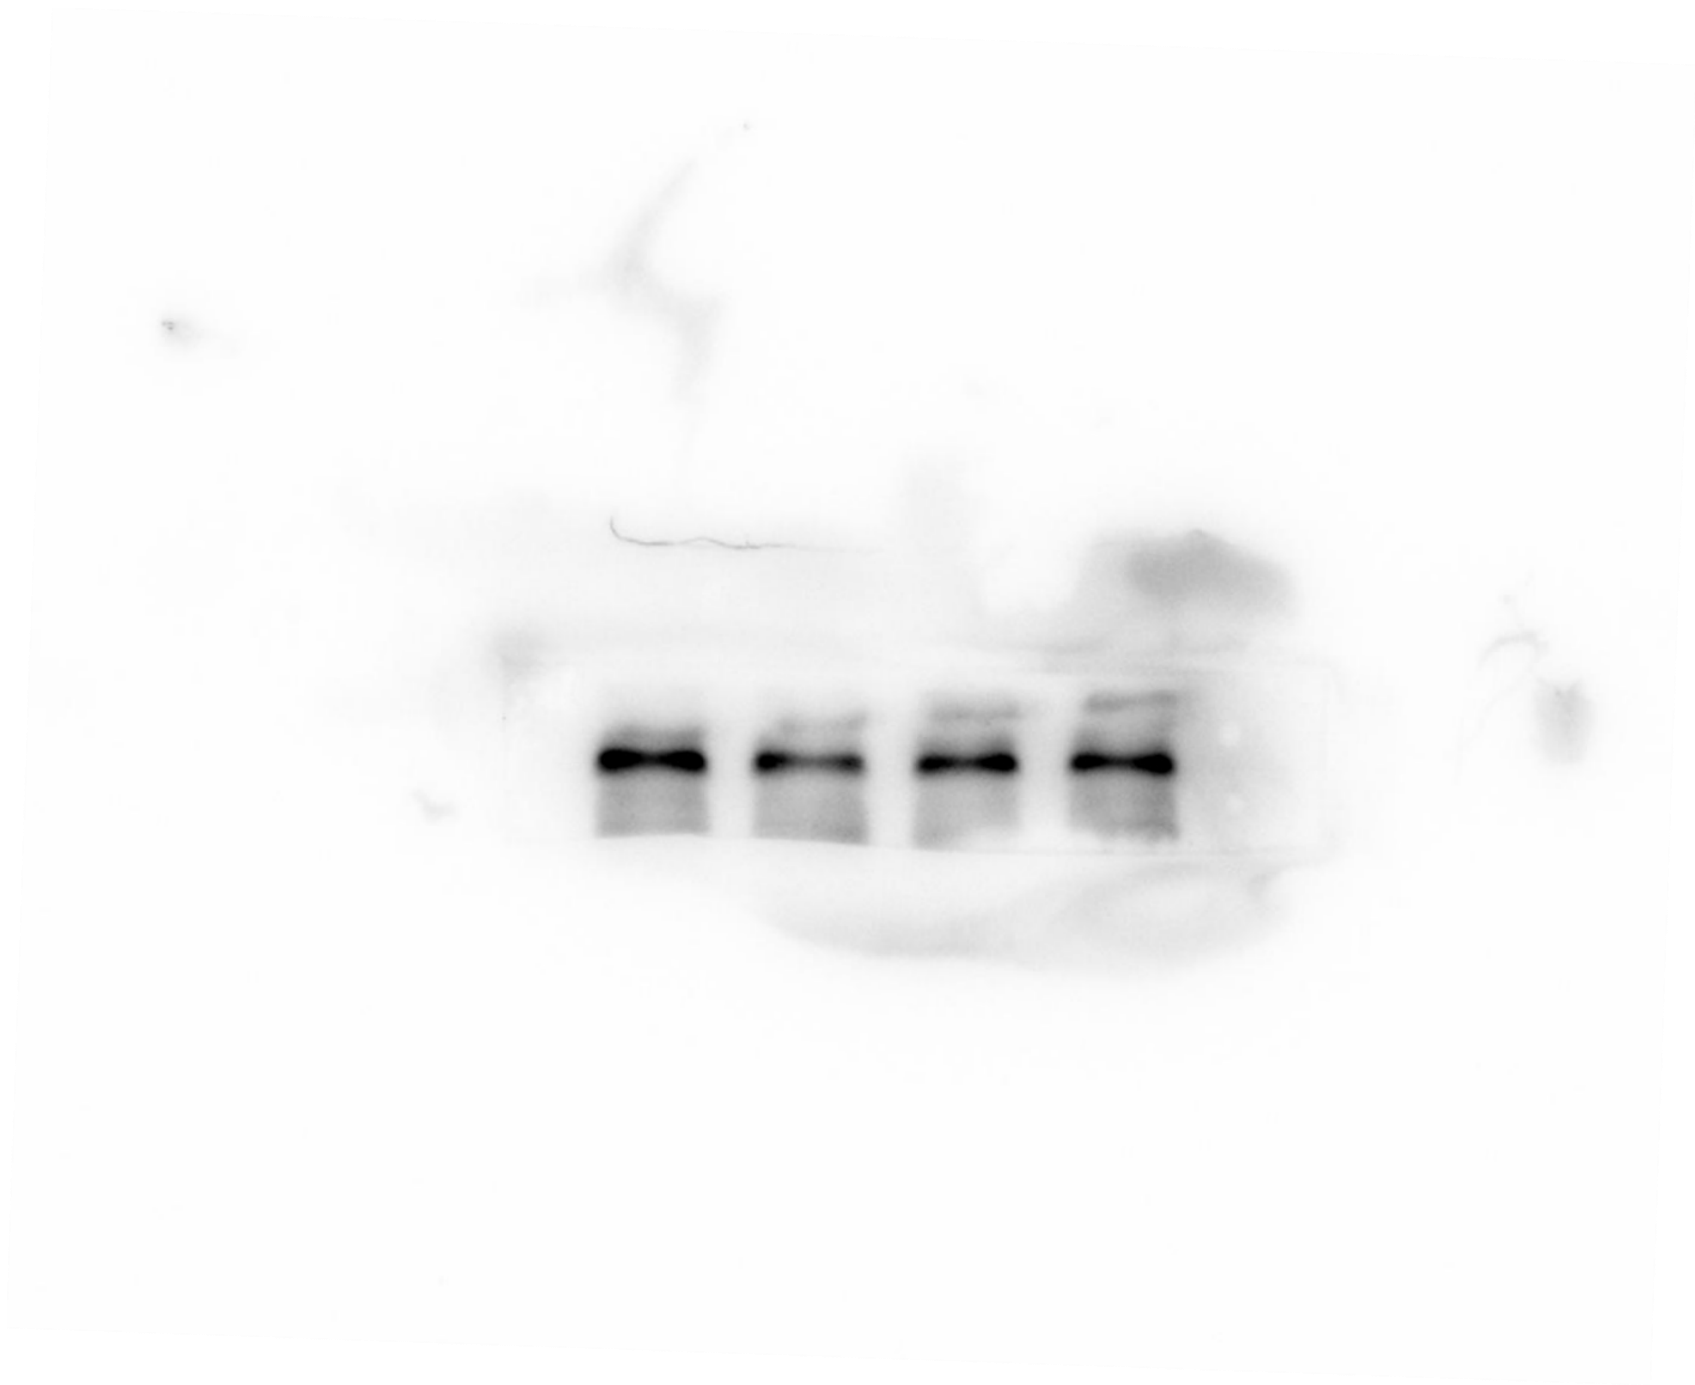

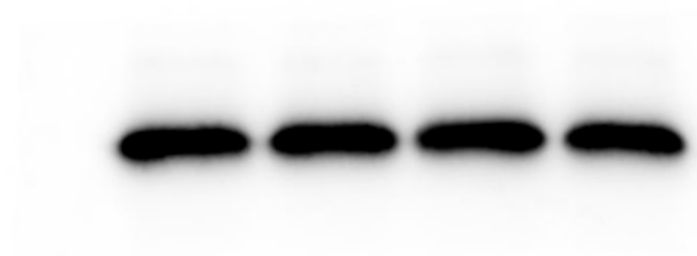

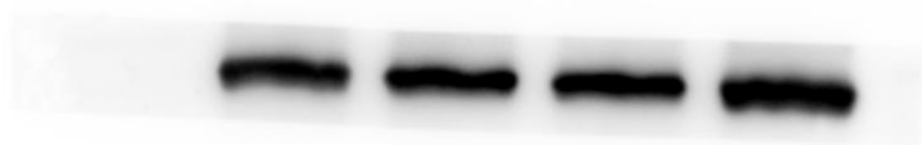

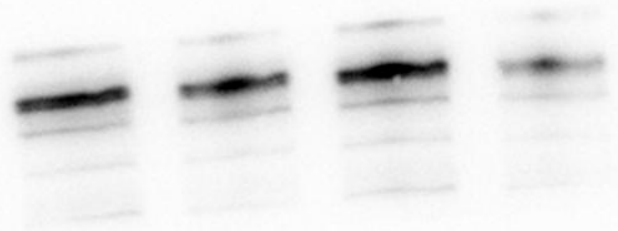

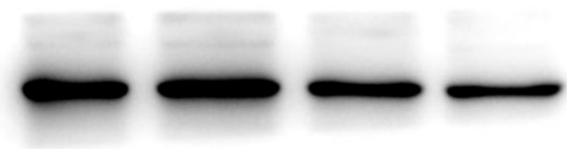



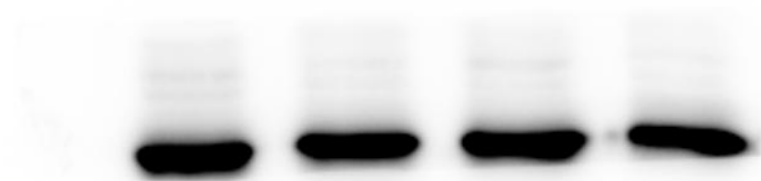

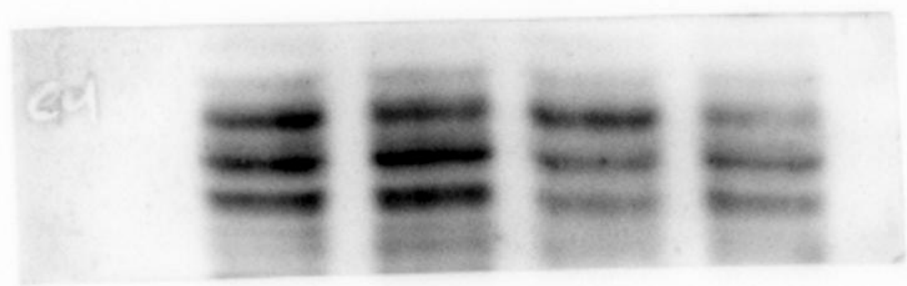

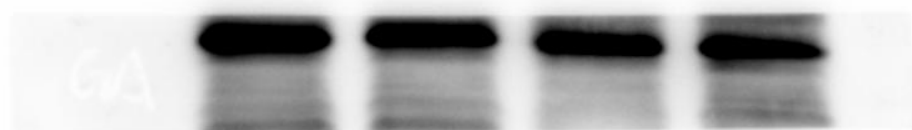

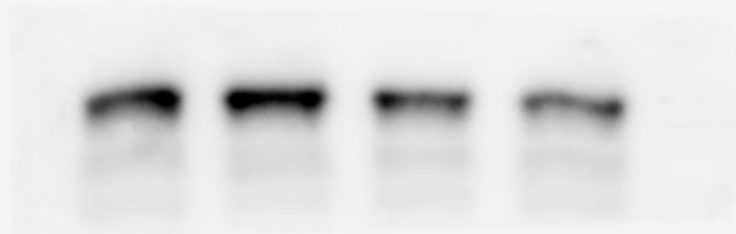

Supplement: 41419_2023_6009_MOESM21_ESM.pdf [file 41419_2023_6009_MOESM21_ESM.pdf]
