# Supplementary material for: Hexokinase 2 confers radio-resistance in hepatocellular carcinoma by promoting autophagy-dependent degradation of AIMP2
Source: PubMed Central journal article supplement (PMC10390495; doi:10.1038/s41419-023-06009-2), 2023-08-01

A

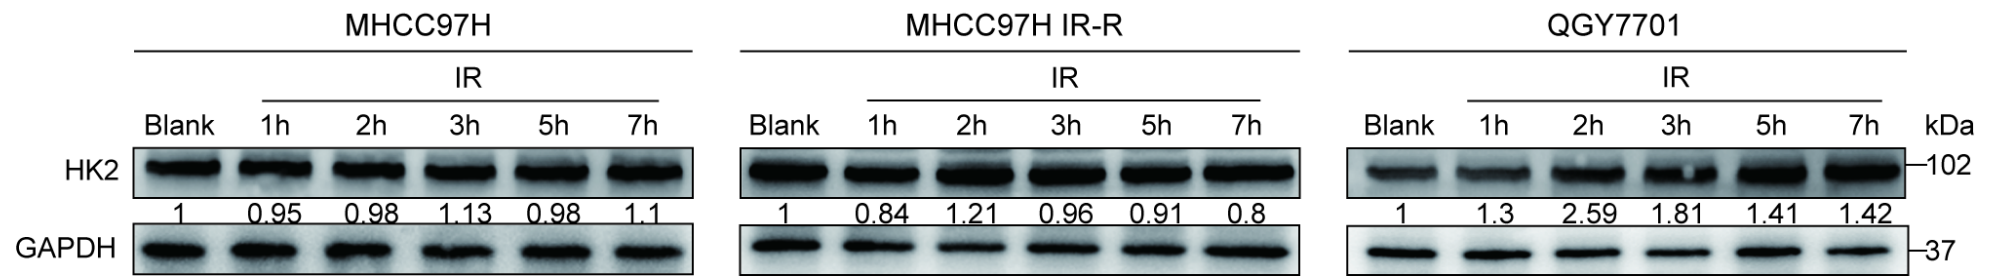

**B**

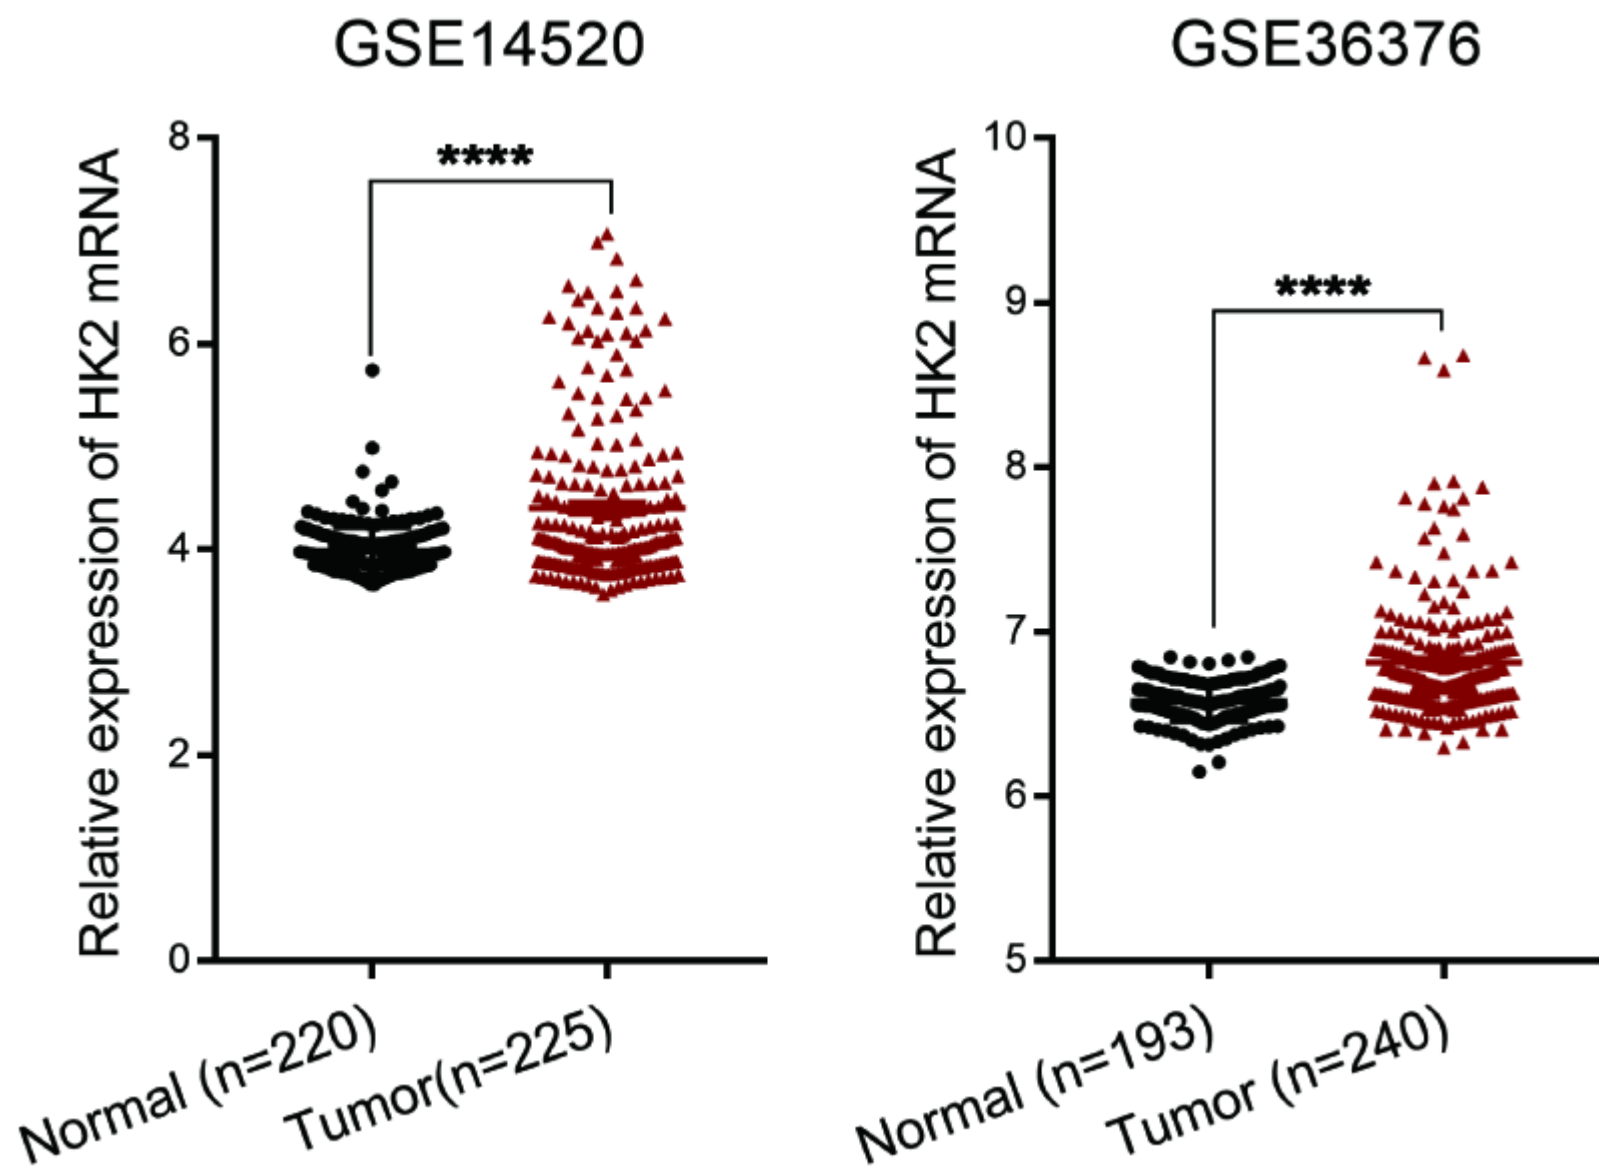

C

GSE14520

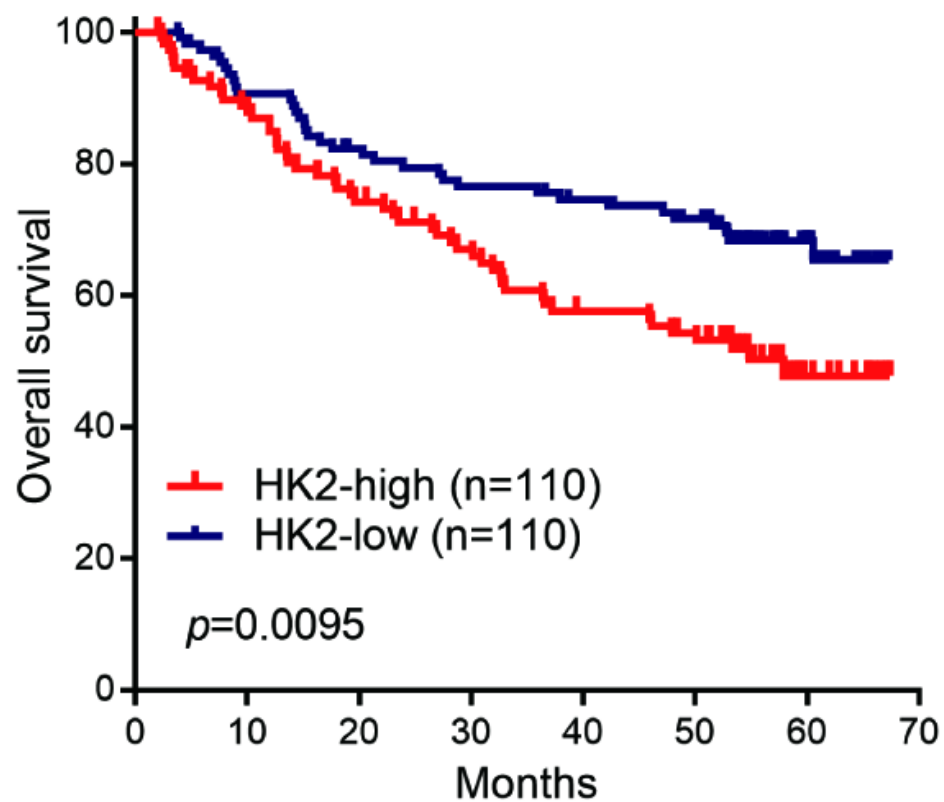

GSE14520

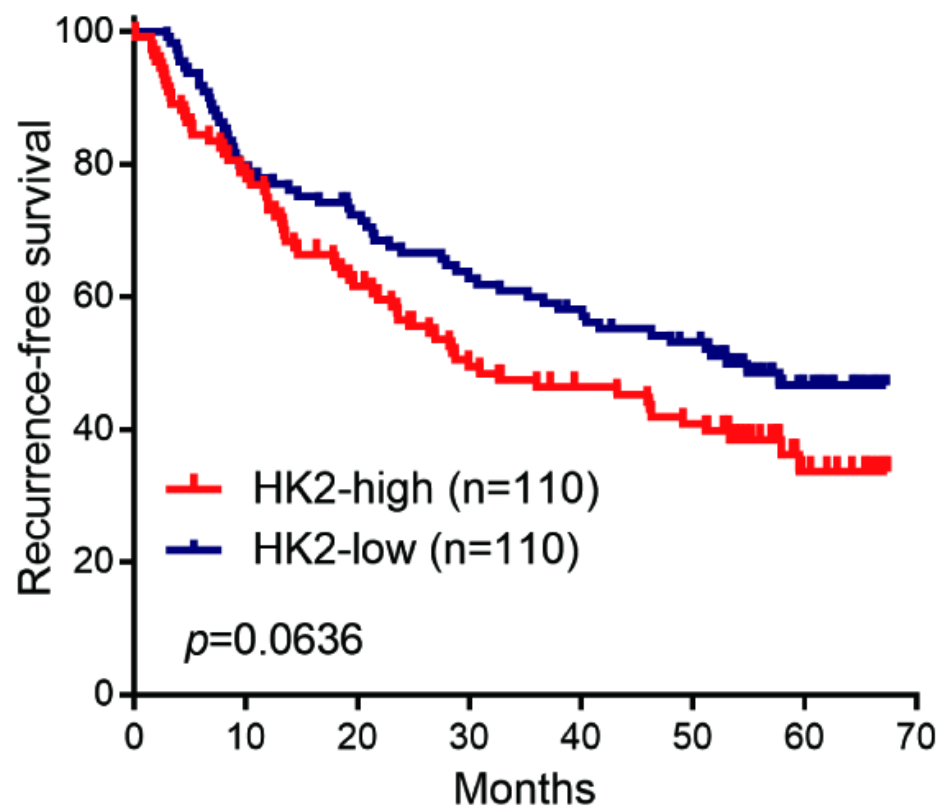

D

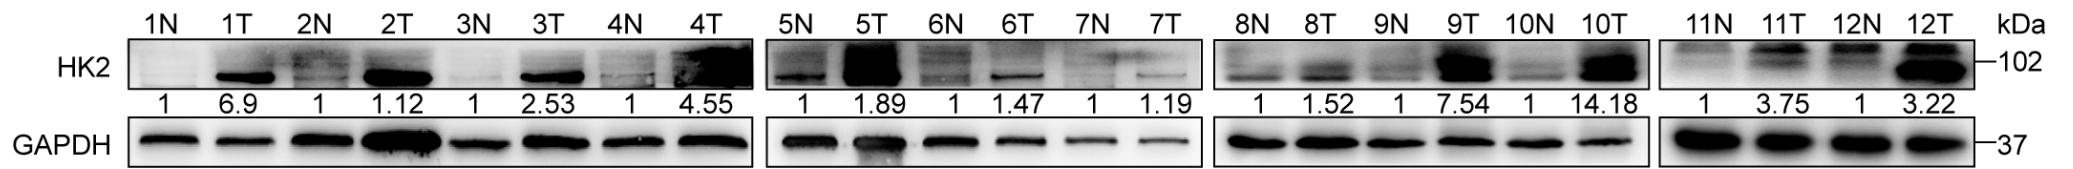

E

Normal

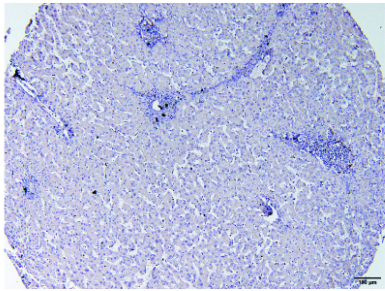

Cirrhosis

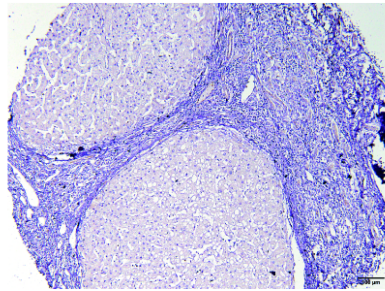

Weak

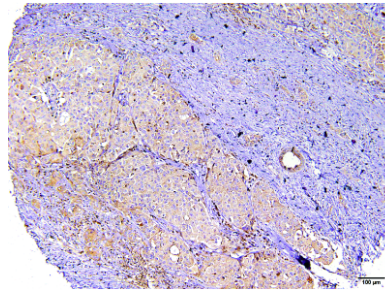

Tumor

Medium

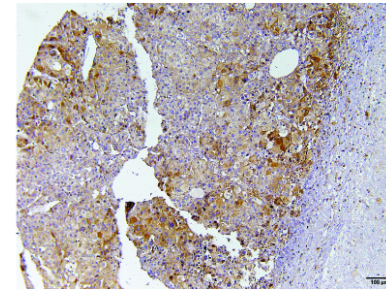

Strong

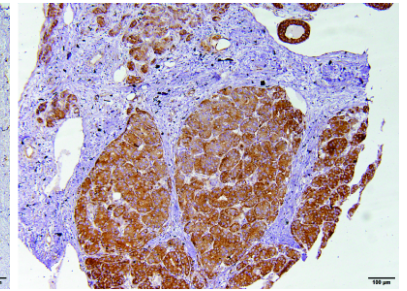

F

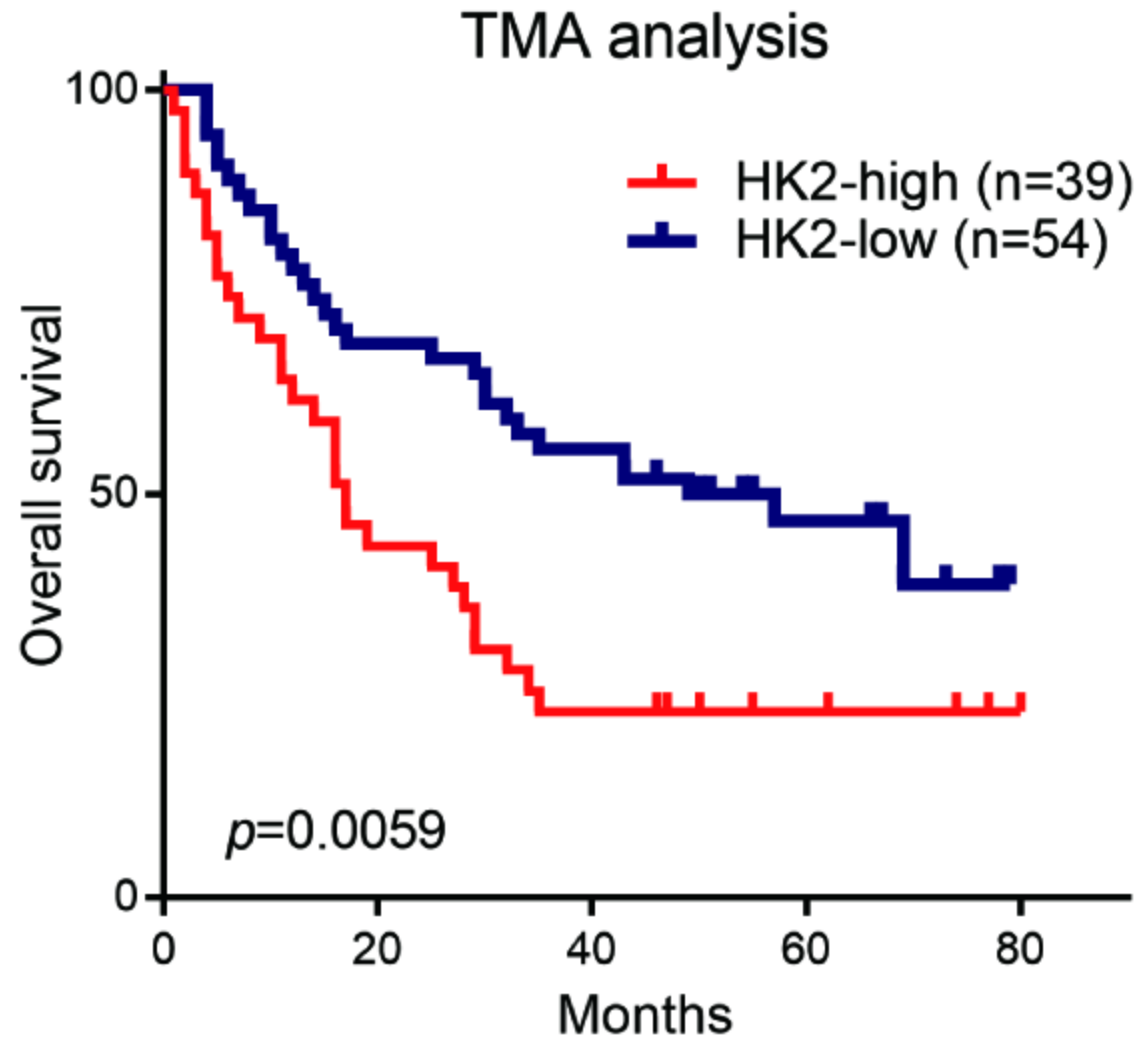

G

Univariant analysis

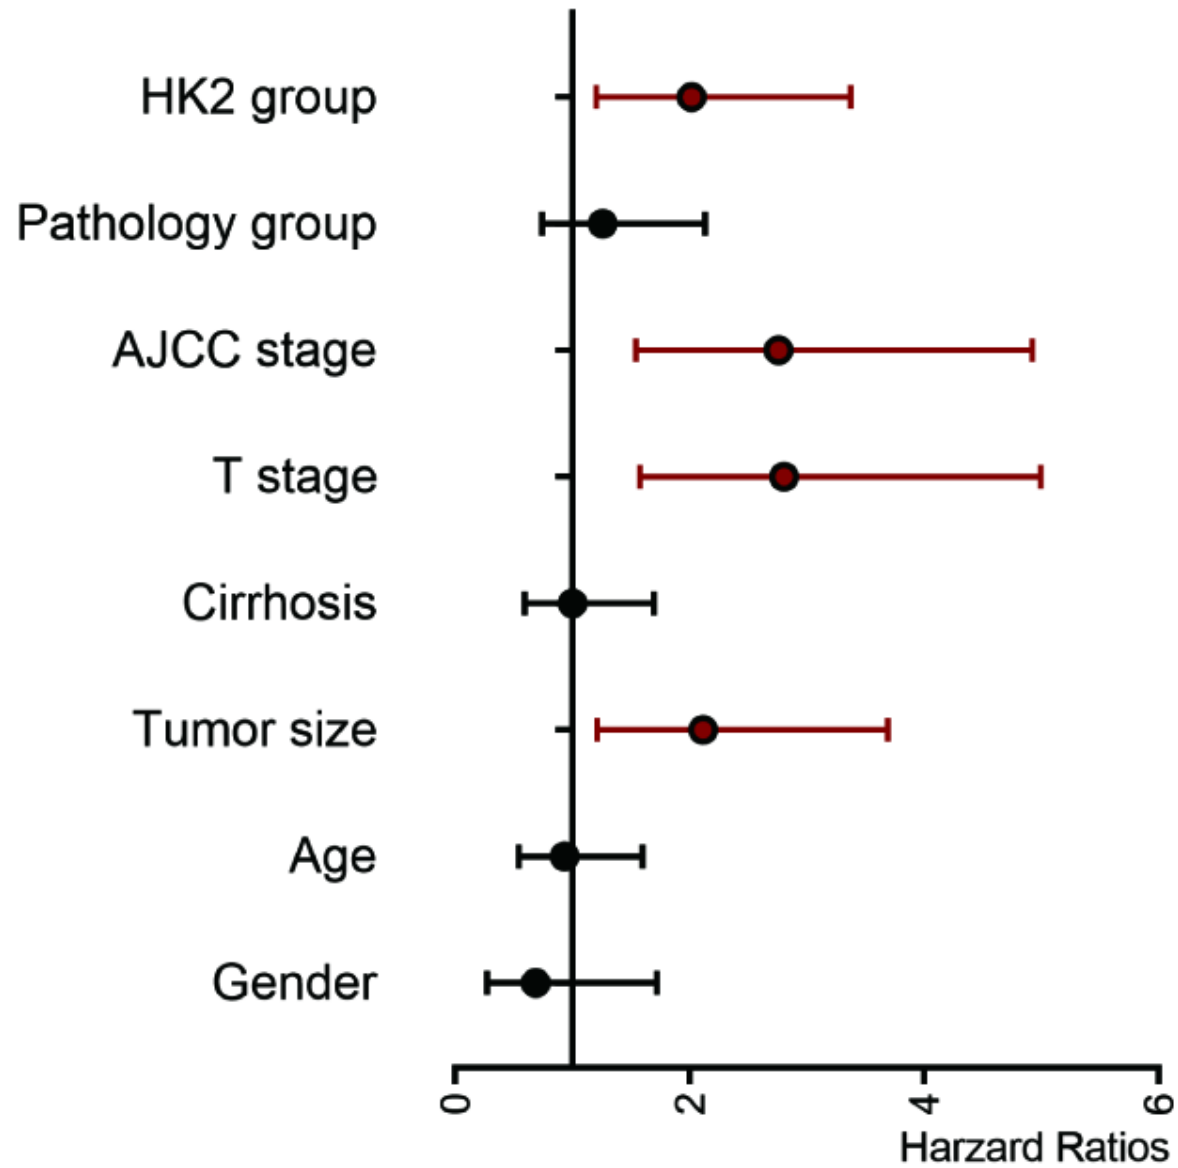

H

Multivariate analysis

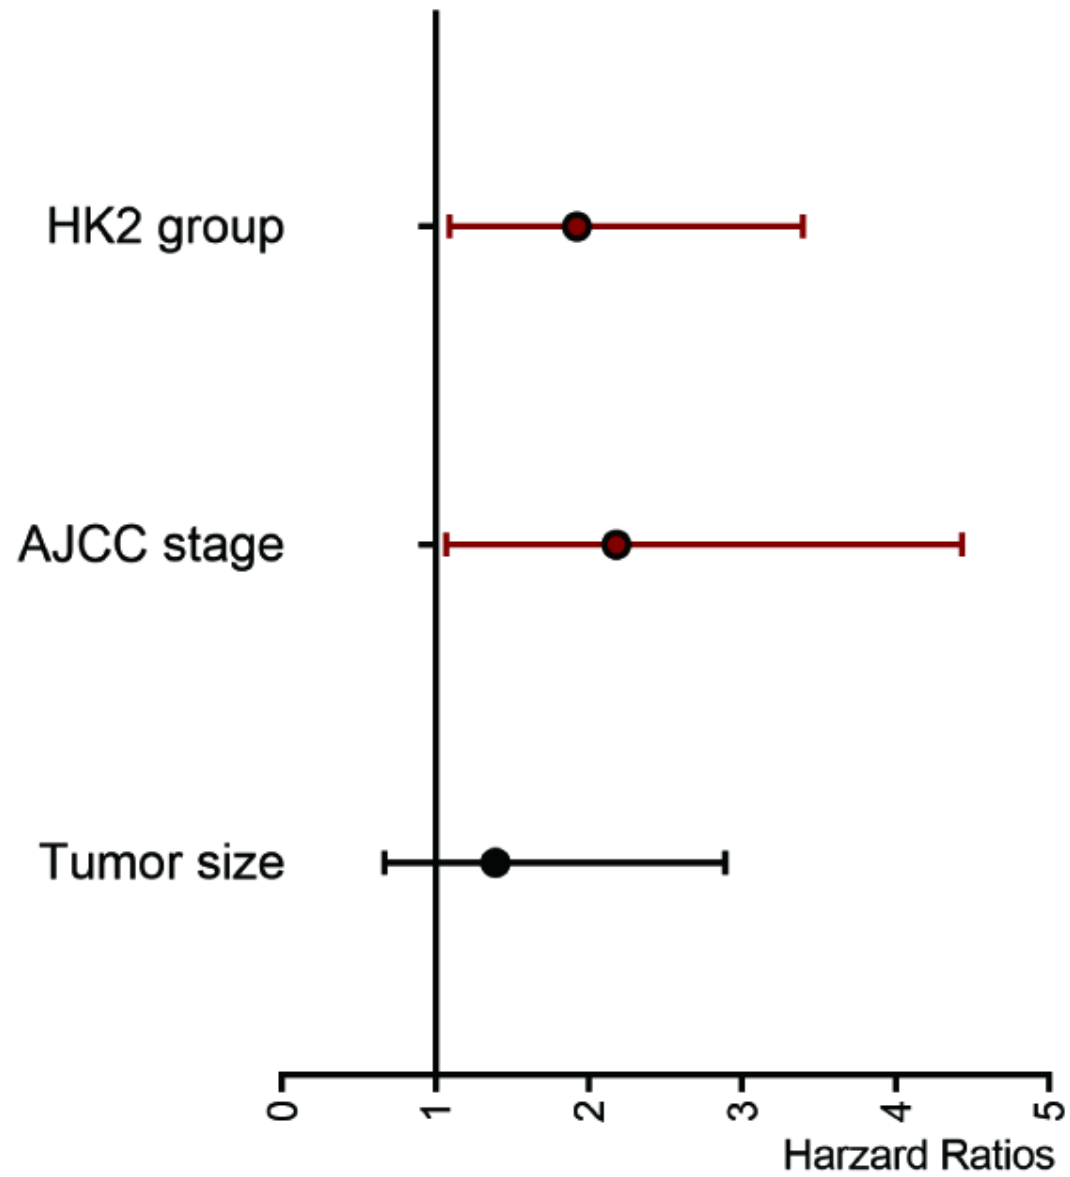

Supplement: 41419_2023_6009_MOESM1_ESM.pdf [file 41419_2023_6009_MOESM1_ESM.pdf]
