# Supplementary material for: Hexokinase 2 confers radio-resistance in hepatocellular carcinoma by promoting autophagy-dependent degradation of AIMP2
Source: PubMed Central journal article supplement (PMC10390495; doi:10.1038/s41419-023-06009-2), 2023-08-01

A

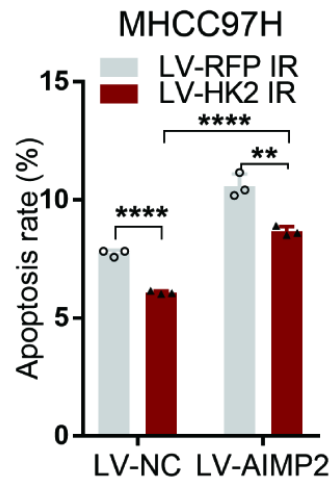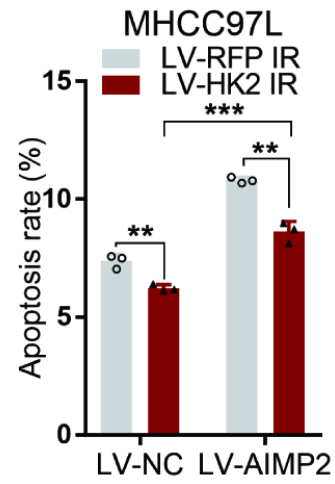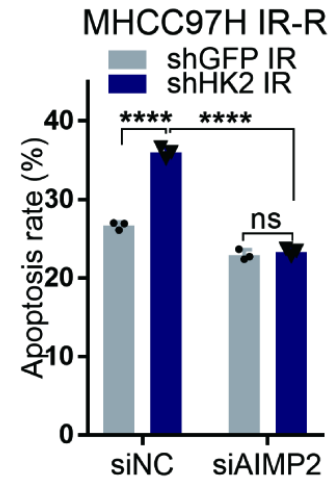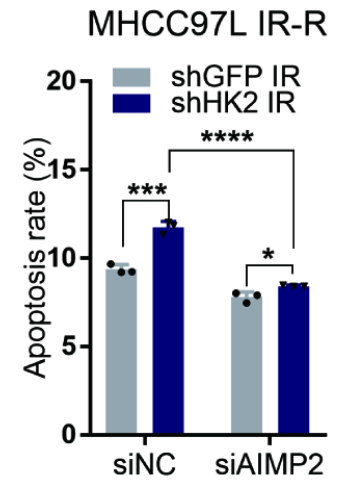

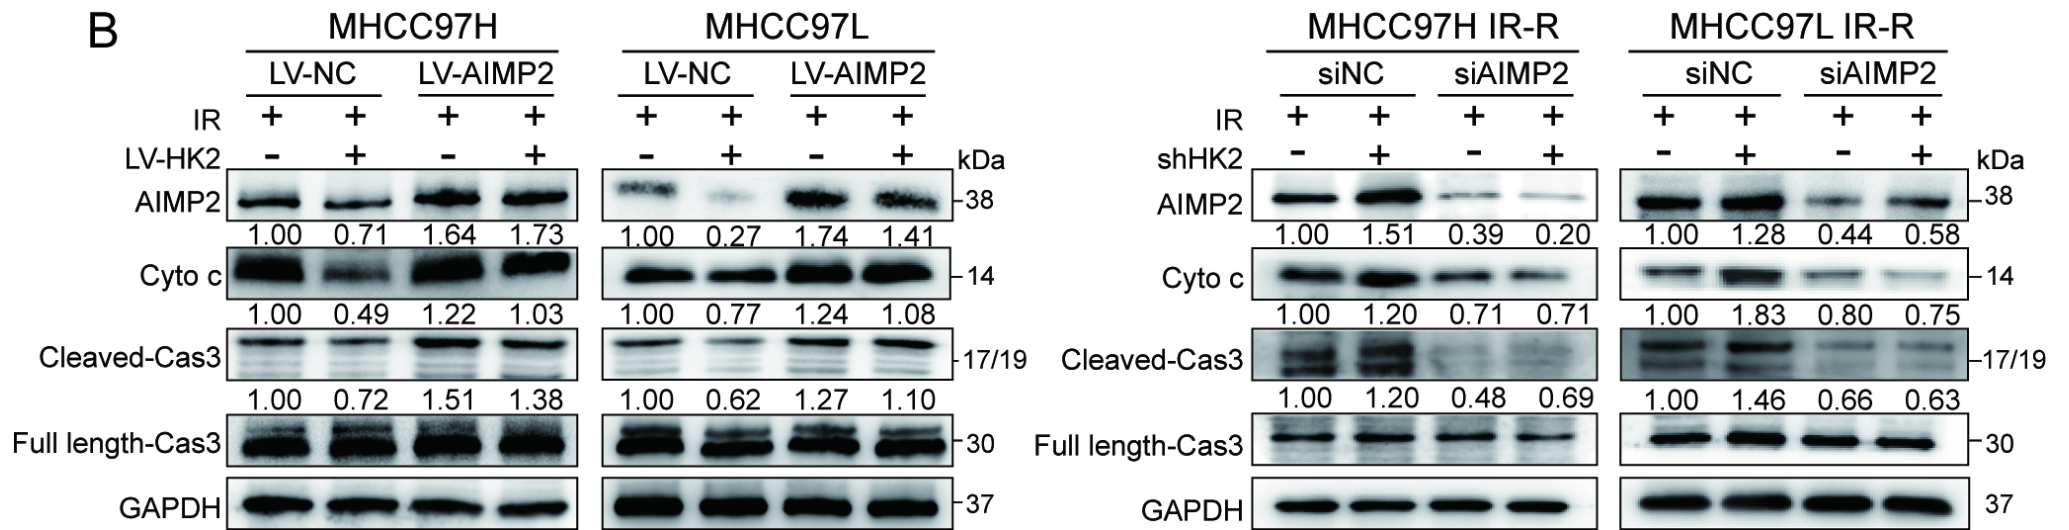

C

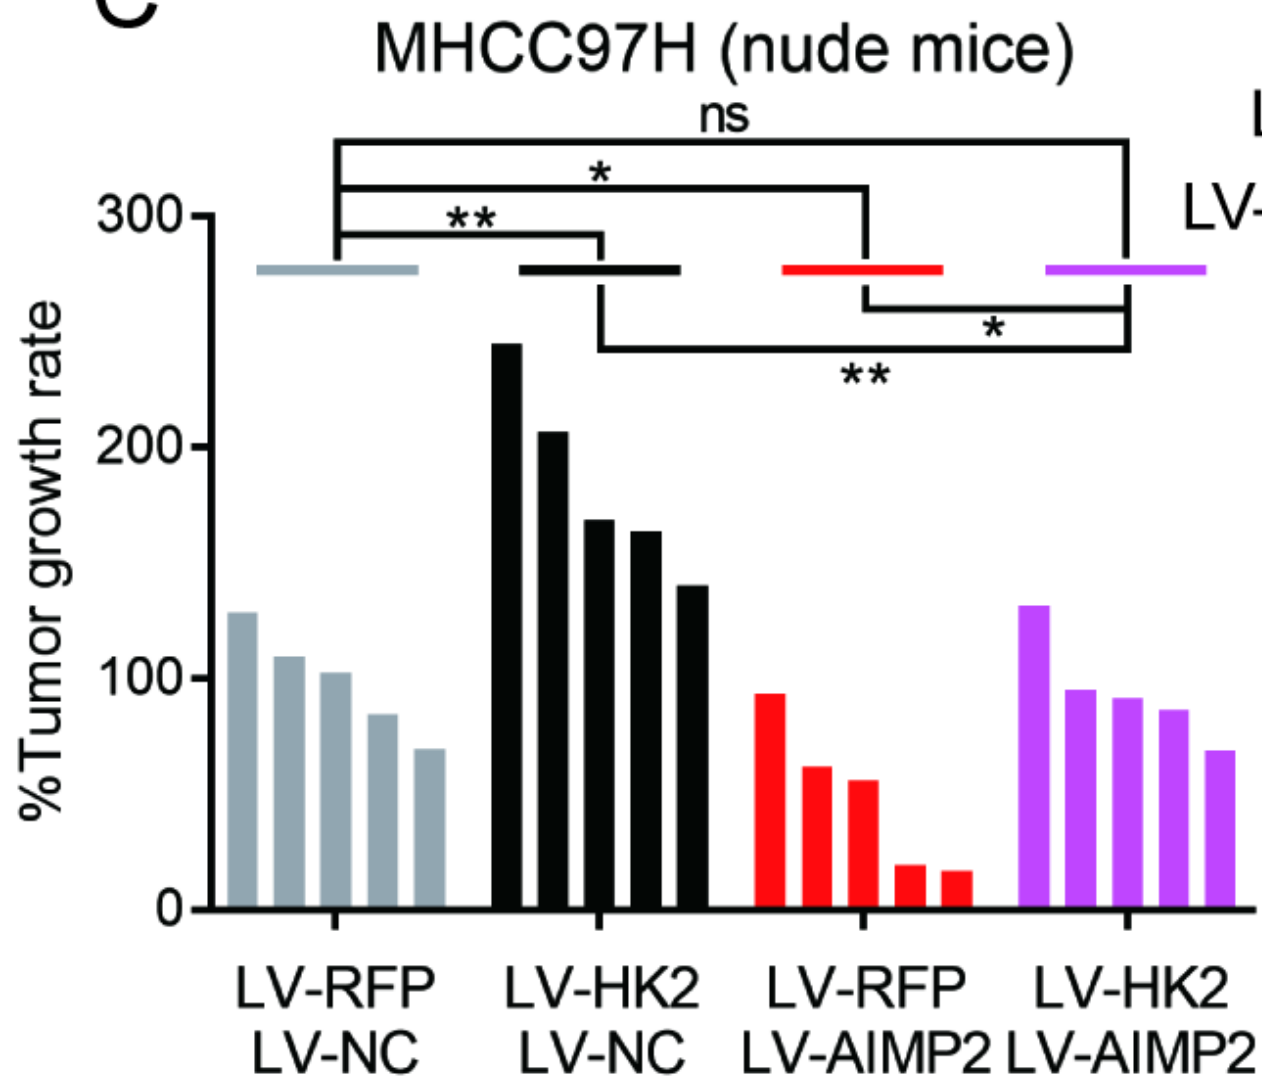

|          |   |   |   |   |
|----------|---|---|---|---|
| IR       | + | + | + | + |
| LV-HK2   | - | + | - | + |
| LV-AIMP2 | - | - | + | + |

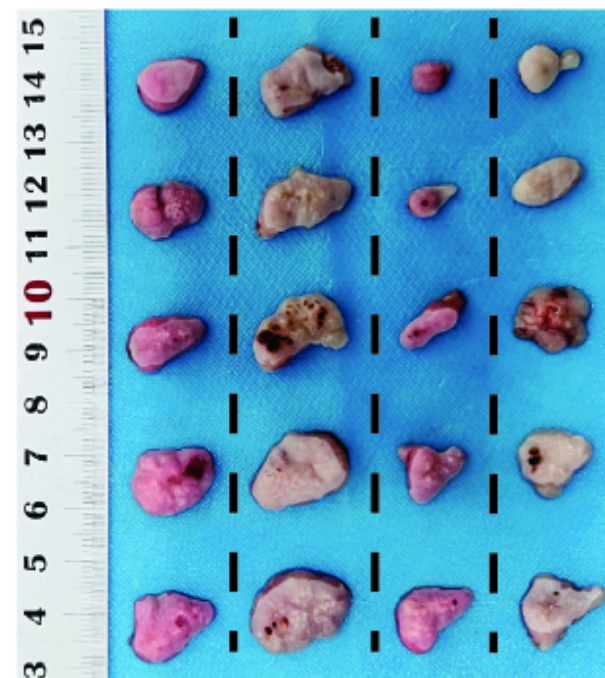

D

MHCC97H

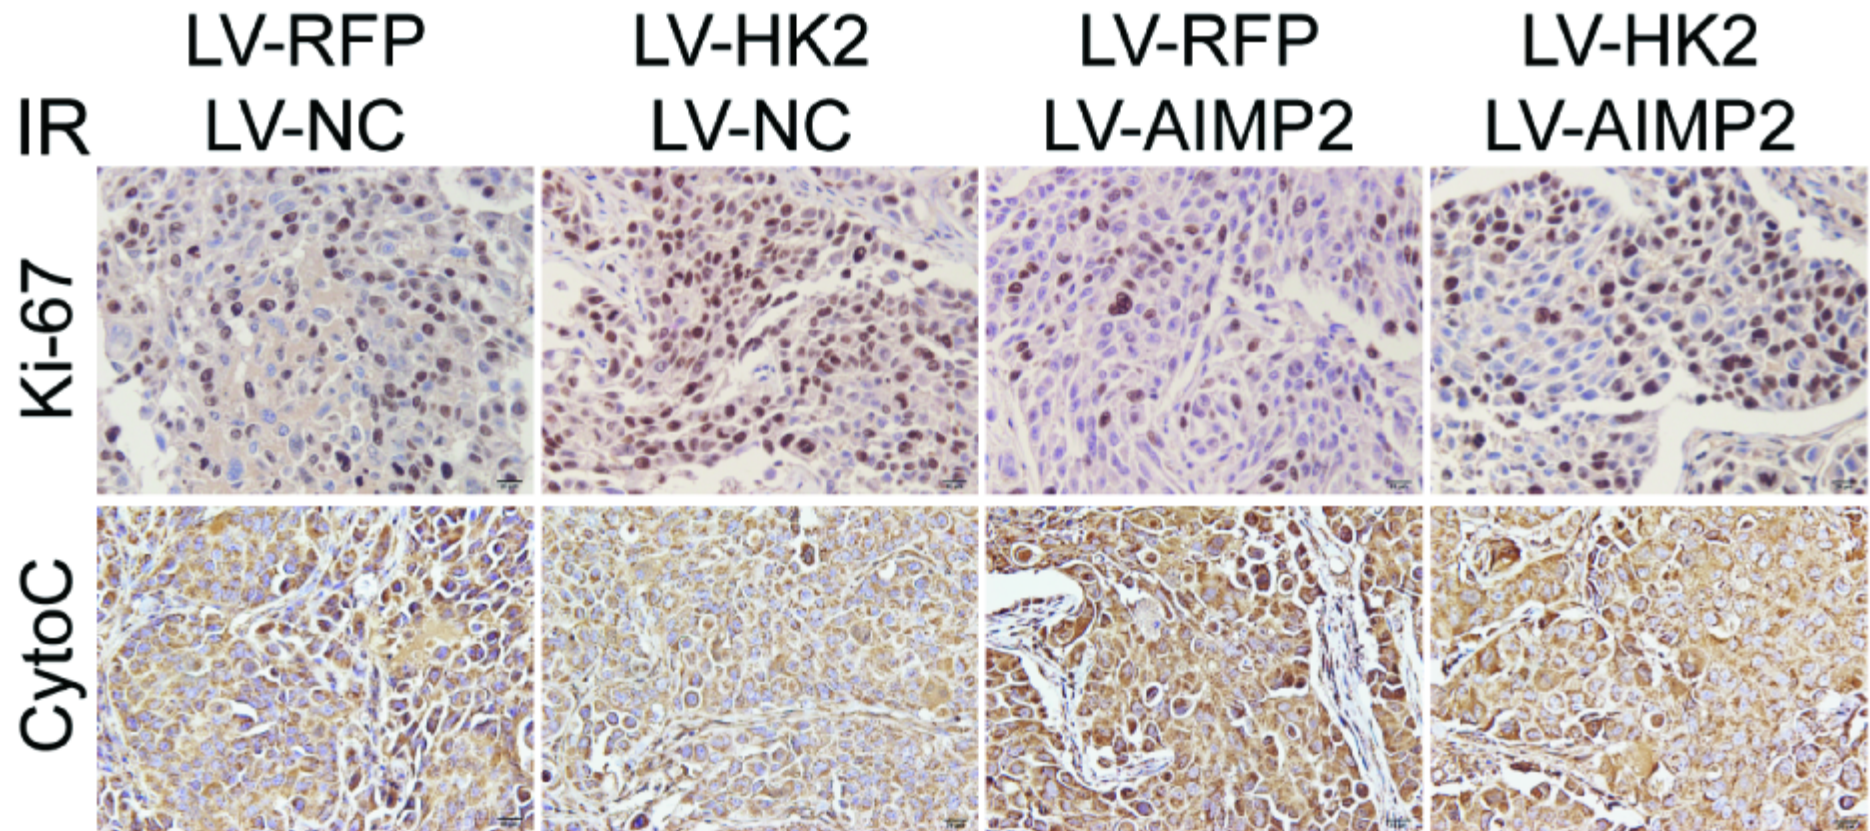

Supplement: 41419_2023_6009_MOESM5_ESM.pdf [file 41419_2023_6009_MOESM5_ESM.pdf]
