# Supplementary material for: Hexokinase 2 confers radio-resistance in hepatocellular carcinoma by promoting autophagy-dependent degradation of AIMP2
Source: PubMed Central journal article supplement (PMC10390495; doi:10.1038/s41419-023-06009-2), 2023-08-01

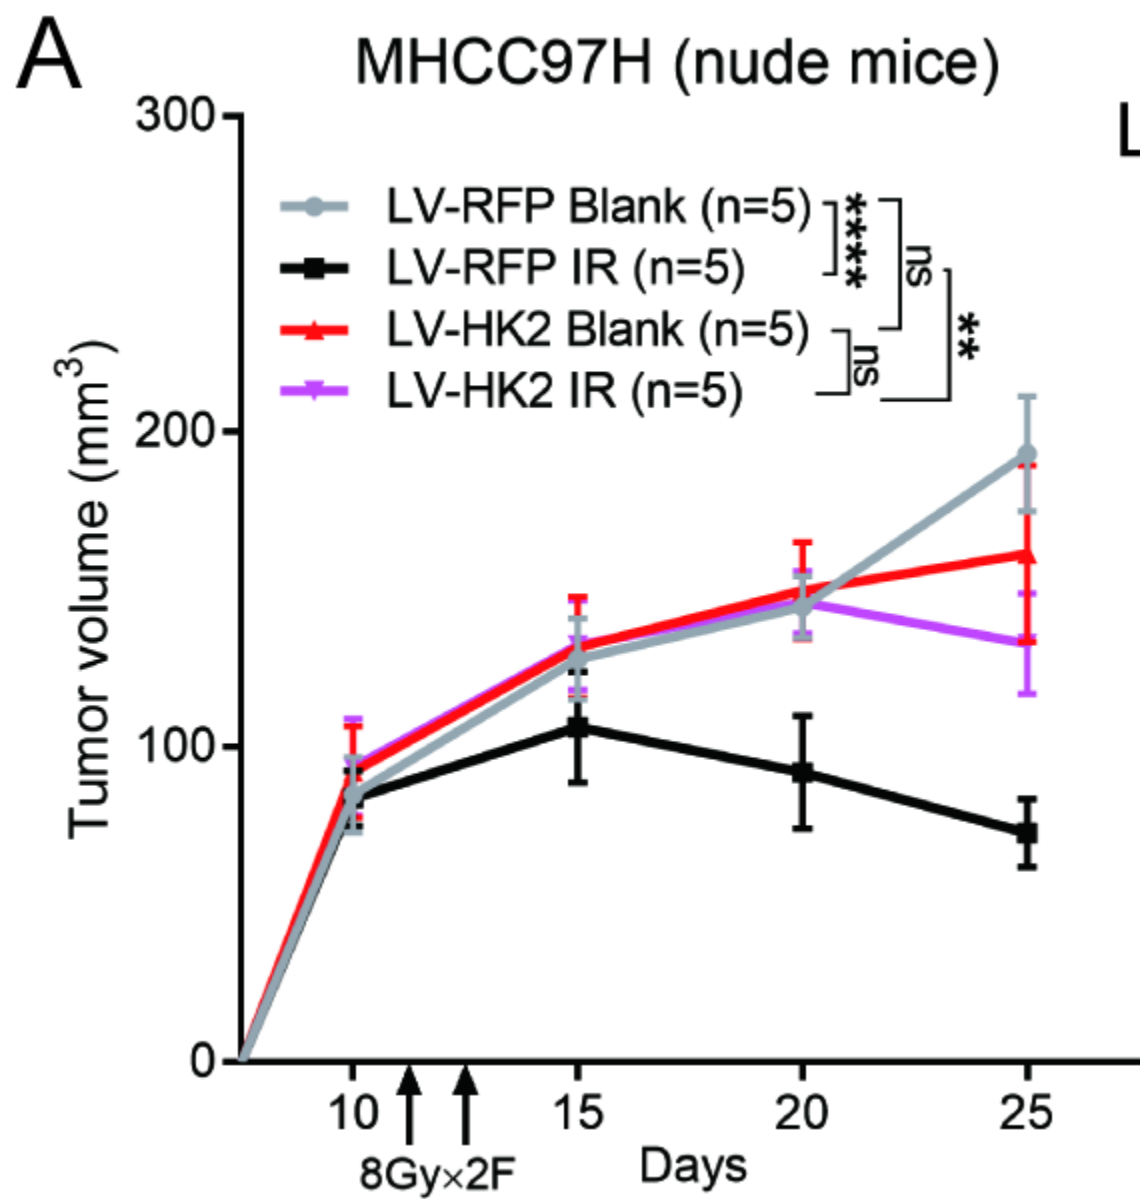

| LV-HK2 | - | - | + | + |
|--------|---|---|---|---|
| IR     | - | + | - | + |

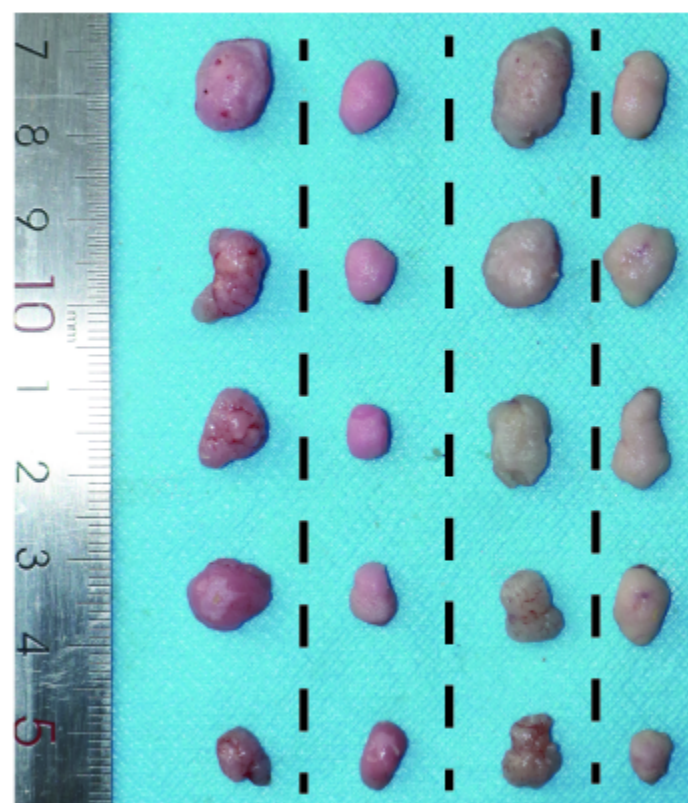

**B**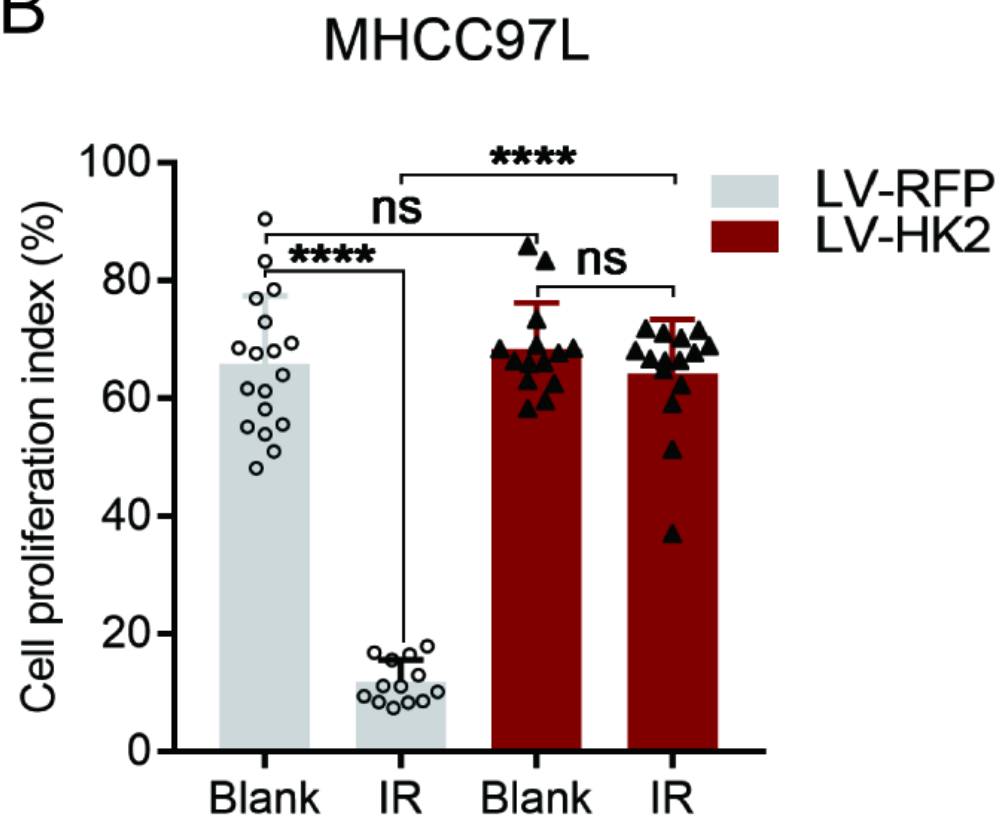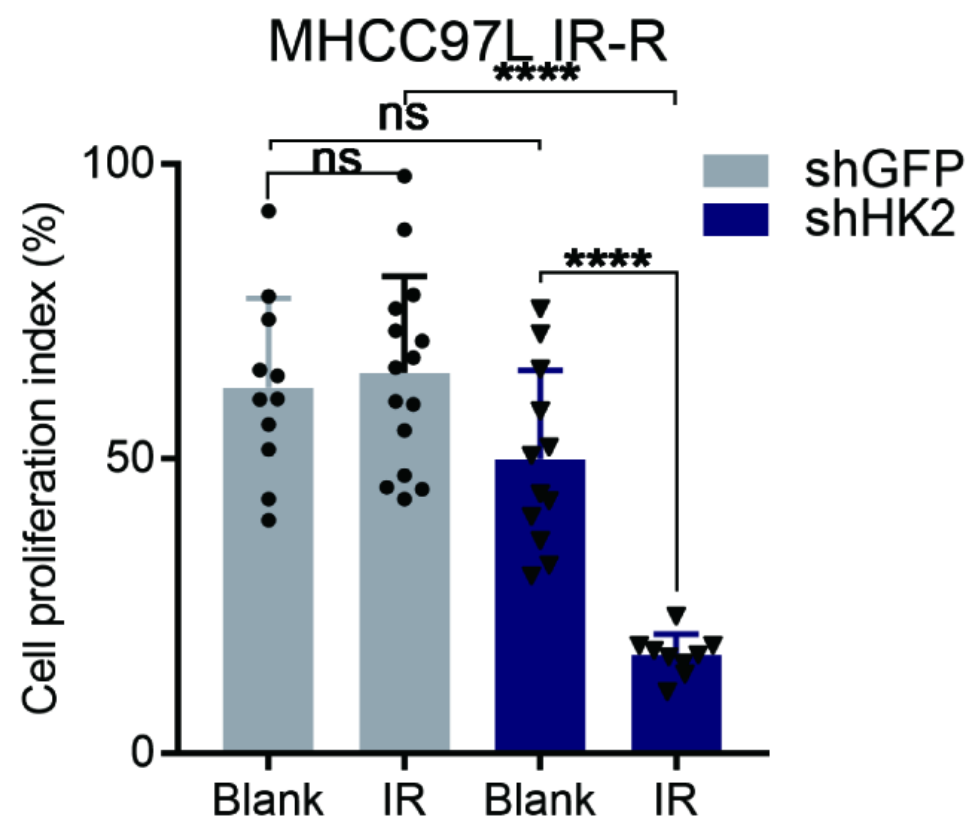

C

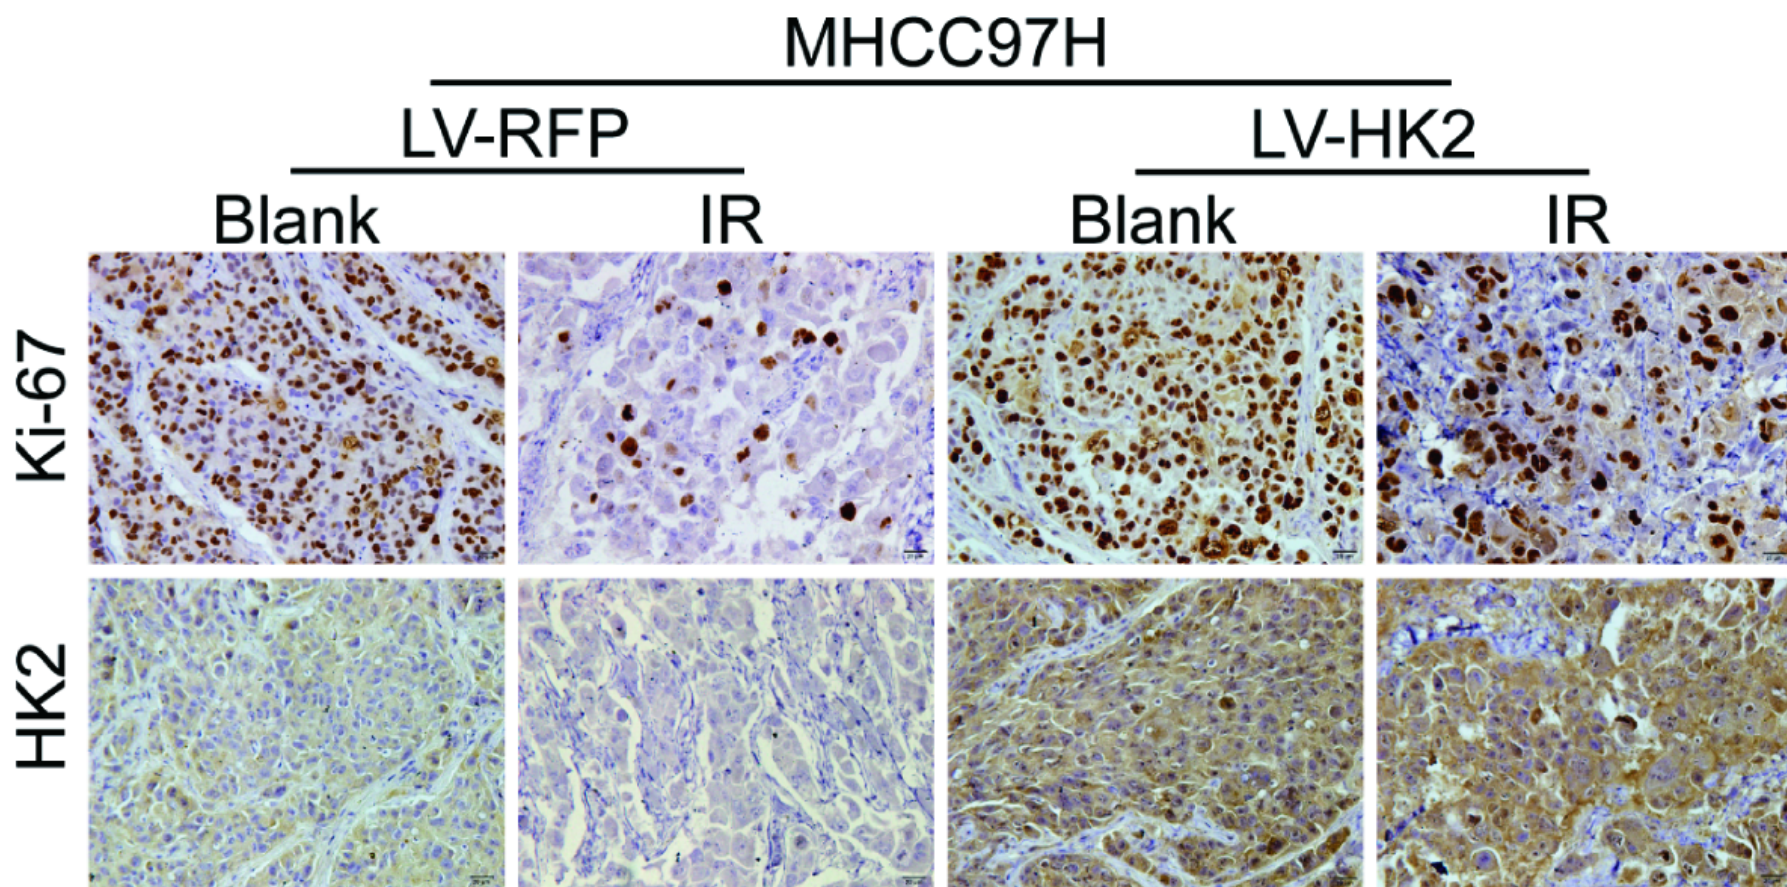

D

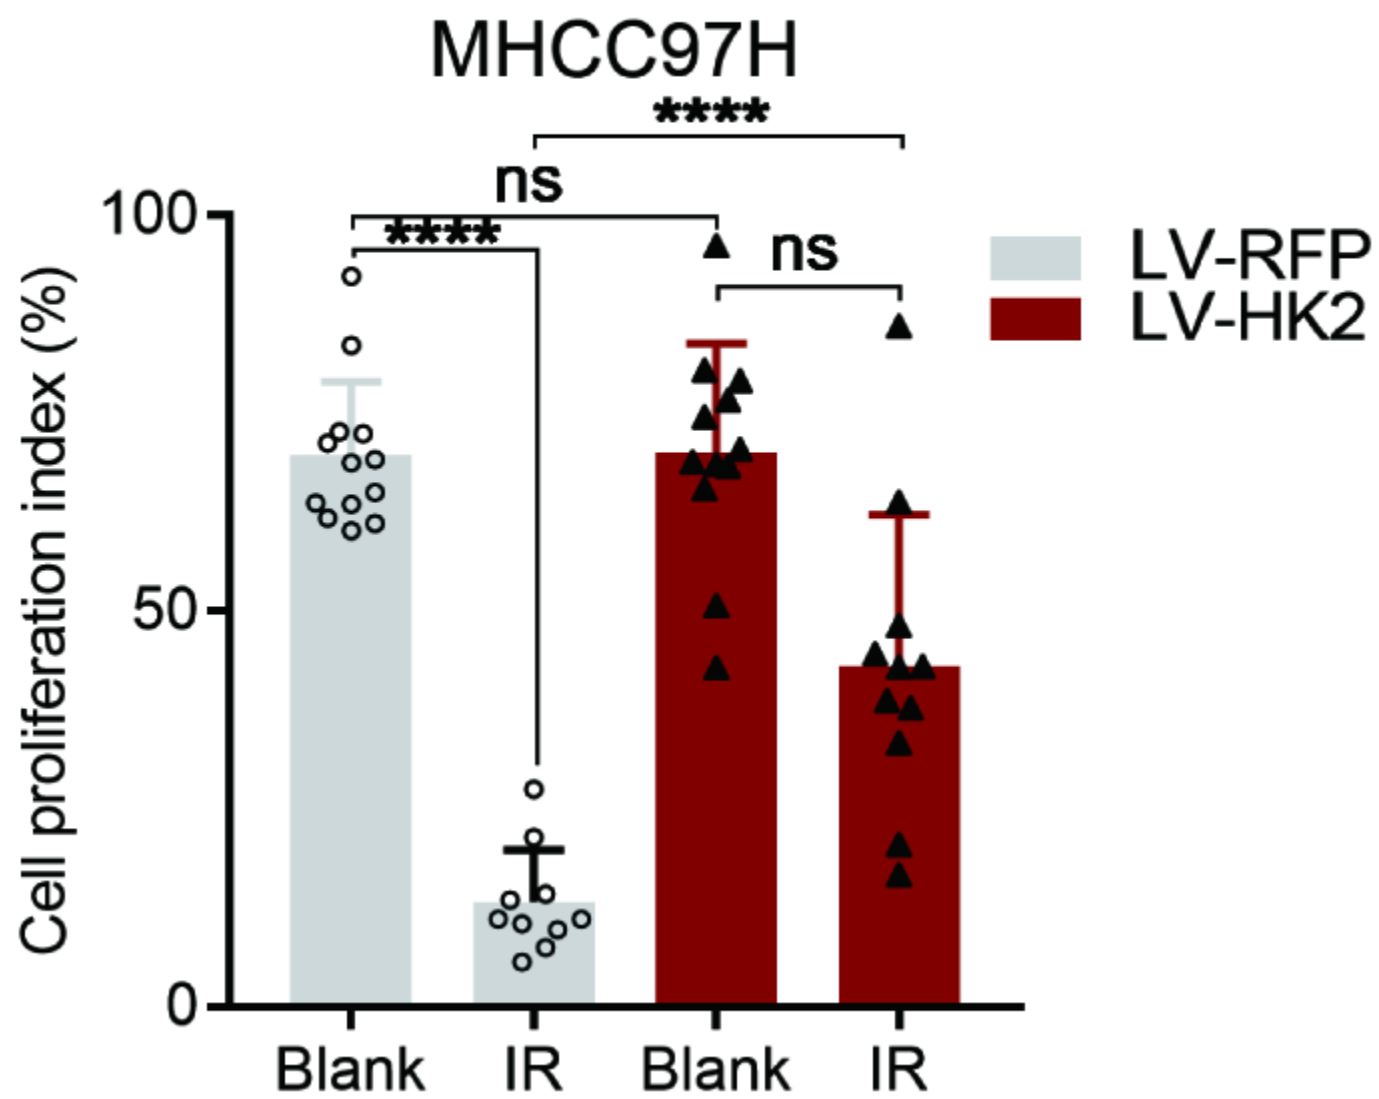

F

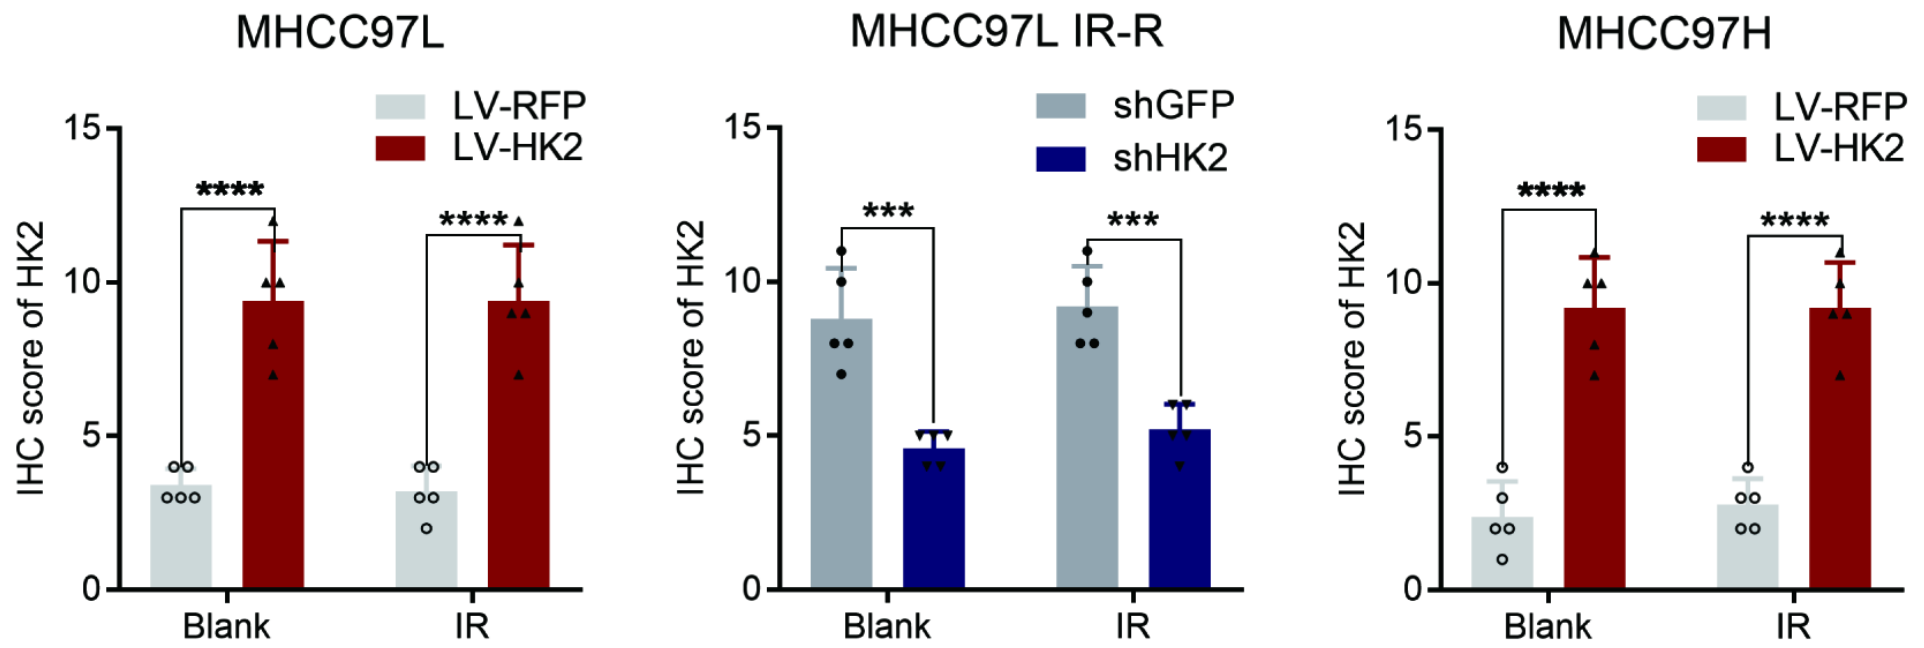

F

H22 cells (nude mice)

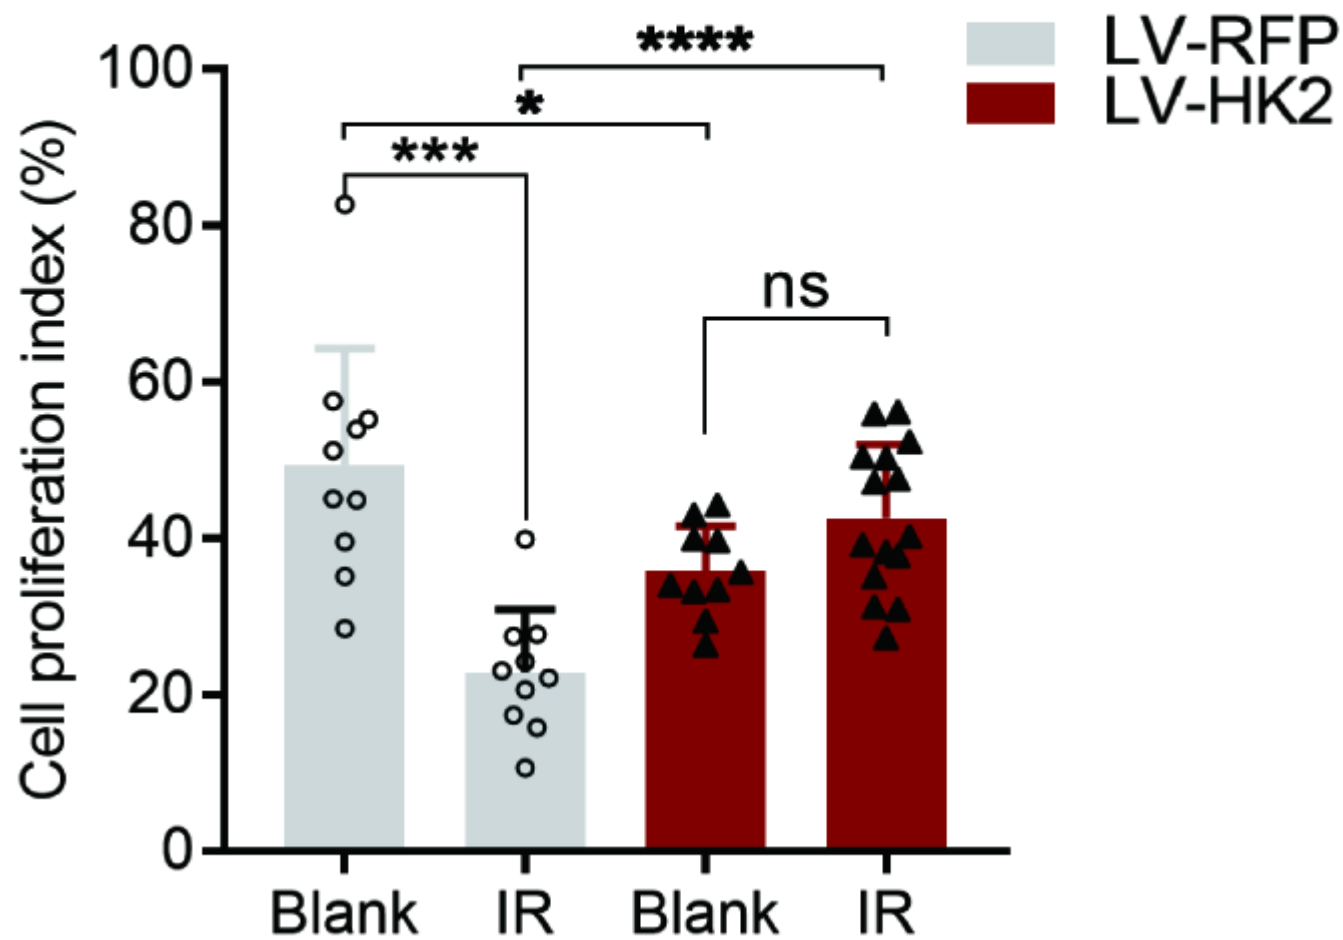

**G**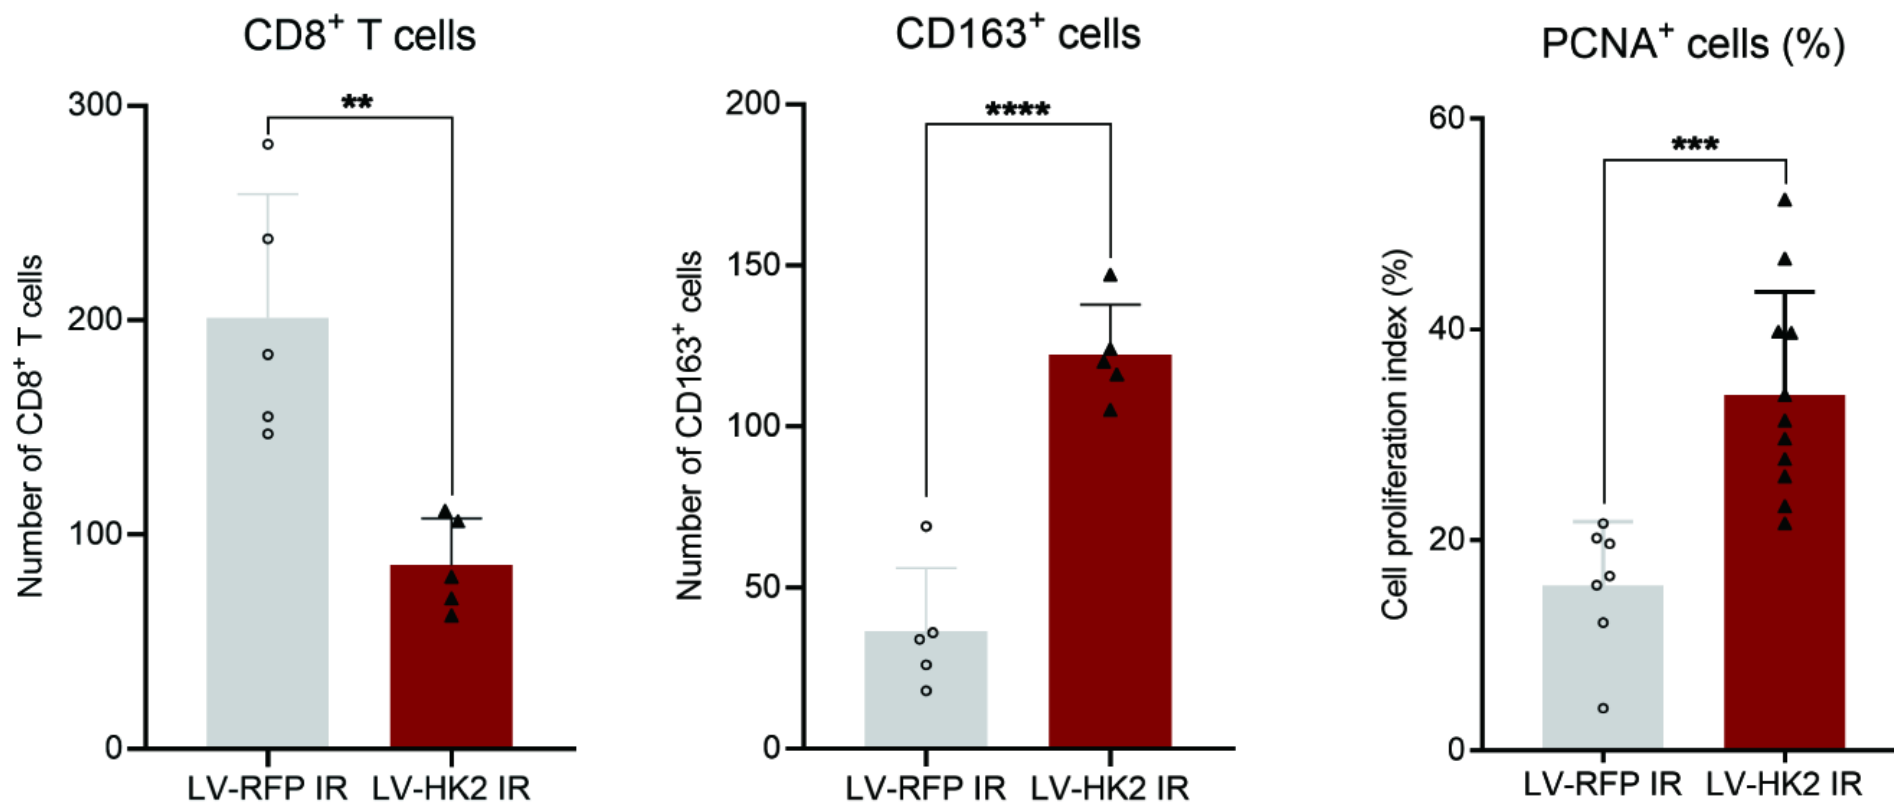

Supplement: 41419_2023_6009_MOESM16_ESM.pdf [file 41419_2023_6009_MOESM16_ESM.pdf]
